# Supplementary material for: A survey of RNA secondary structural propensity encoded within human herpesvirus genomes: global comparisons and local motifs
Source: PeerJ journal article supplement (doi:10.7717/peerj.9882), 2020-09-10
Supplement: FigureS2.oriPregion.pdf [file FigureS2.oriPregion.pdf]

NC\_007605.1

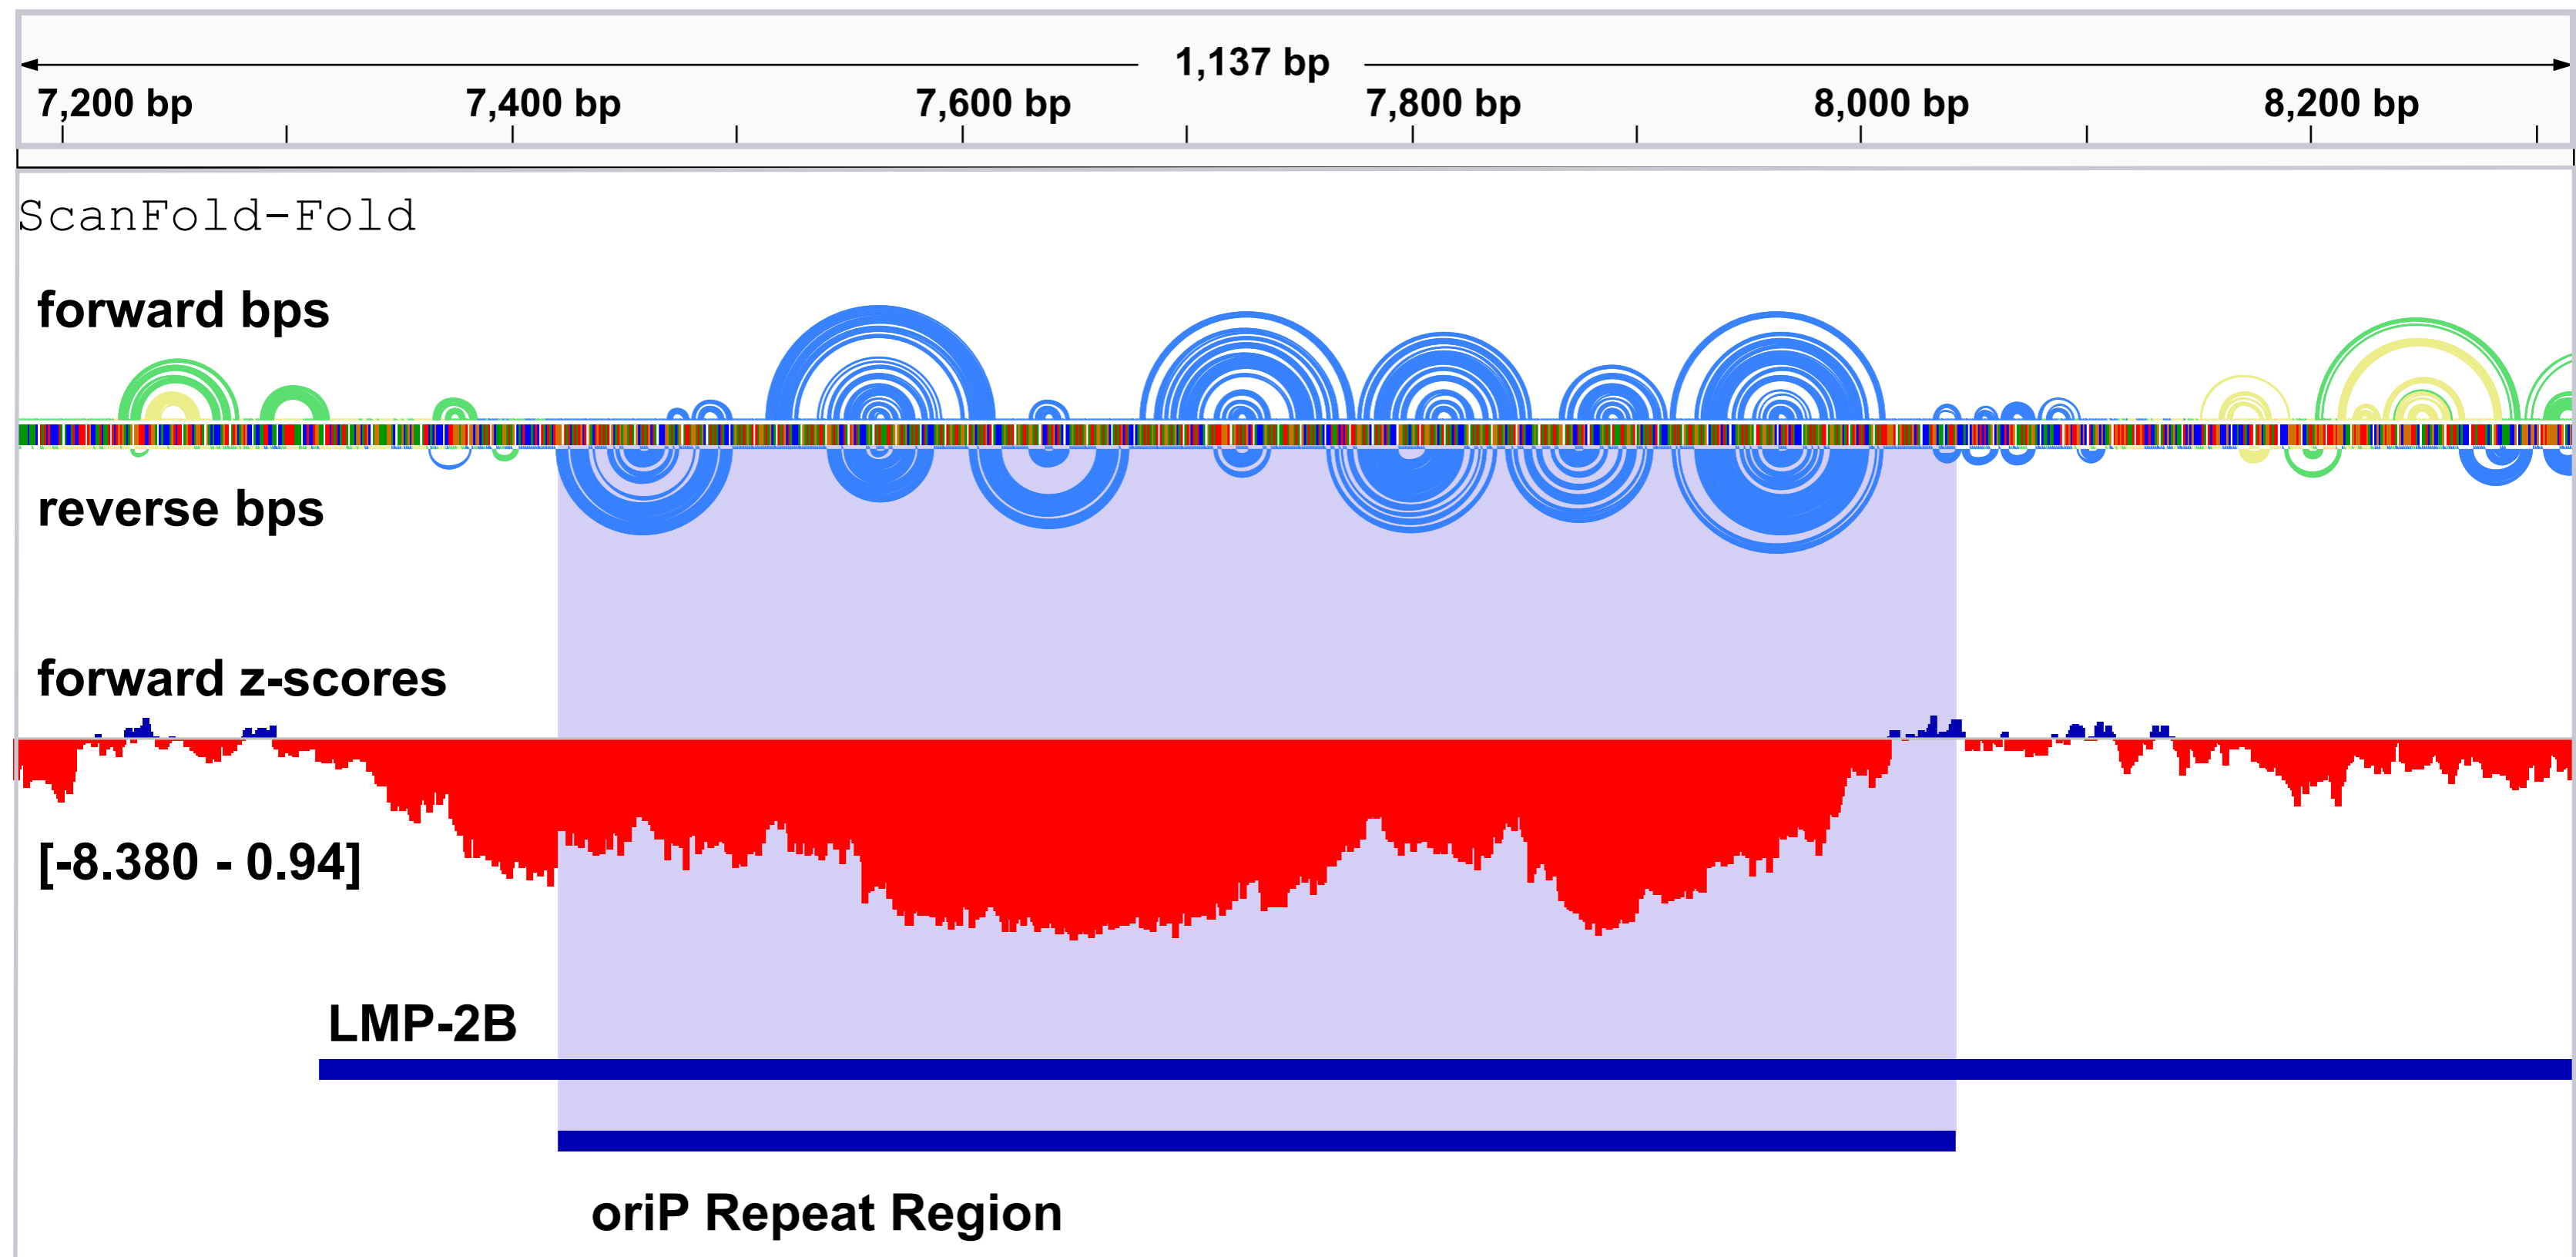

**Supplemental Figure 2: Results for the oriP Region of the EBV genome.** Shown is an IGV visualization of results. EBV-1 genome coordinates are followed by ScanFold-Fold predicted base pairs for both the forward and reverse sequences are represented as arcs (colored blue and green for bp with average z-score  $< -2$  and  $-1$ , respectively, and yellow for bp with negative average z-scores  $> -1$ ), and the genome sequence (A, C, G, and T are in green, blue, orange and red, respectively). Below this is a bar-graph showing the forward window z-score values predicted by ScanFold-Scan (each bar sits at the 1st nt of the window and is colored red or blue for negative/positive values, respectively; the range of values are indicated in brackets).
