# Supplementary material for: A survey of RNA secondary structural propensity encoded within human herpesvirus genomes: global comparisons and local motifs
Source: PeerJ. 2020 Sep 10;8:e9882. doi: 10.7717/peerj.9882 (PMC7487152; doi:10.7717/peerj.9882)
Supplement: Supplemental Information 7 — Predicted miRNAs are listed along with sequence and positional information of the corresponding target (BFRF1 3 UTR). miRNA binding regions can be cross referenced to ScanFold predicted structures and to RBP sites, which facilitates hypothesis generation regarding the function of a motif and/or region. [file peerj-08-9882-s007.xlsx]

## Sheet: Sheet1
Target:	Name of sequence input for miRDuplex.	Target	i	j	i-j sequence	miRNA	miRNA sequence	duplex sequnce	duplex structure	i-j subfragment	miRNA subfragment	interaction energy	duplex energy	break target structure	break miRNA structure
i:	First nucleotide postition of the miRNA binding region.	BFRF1_3'_UTR_	152	222	UGCAUGCGGCCGGUGGUCCUGCGGGGGGUGACGGUCAGGCAGCUCCUGUAUUUAACUUUGCGGACAGAGG	hsa-miR-4750-3p_MIMAT0022979_Homo_sapiens_miR-4750-3p	CCUGACCCACCCCCUCCCGCAG	CUGCGGGGGGUGACGGUCAGG&CCUGACCCACCCCCUCCCGCAG	((((((((((((..(((((((&))))))))))))))...)))))	19,39	2,23	-21.13	-34.5	13.18	0.19
j:	Last nucleotide position of the miRNA binding region.	BFRF1_3'_UTR_	350	420	UAUCAGACGCGUUAUGGCACGCCGGCUGCCCAAGCCCACCCUCCAGGGGAGGCUGGAGGCGGAUUUUCCA	hsa-miR-3620-5p_MIMAT0022967_Homo_sapiens_miR-3620-5p	GUGGGCUGGGCUGGGCUGGGCC	GGCACGCCGGCUGCCCAAGCCCAC&GUGGGCUGGGCUGGGCUGGGCC	(((...((((((((((.(((((((&)))))))))))..)))))))))	16,39	2,23	-12.89	-34.49	11.95	9.65
i-j sequence:	The RNA sequence between i and j.	BFRF1_3'_UTR_	104	174	UCCCGCCUCUUGGAUGCCAUCAUCCCCUGCUUGGGACCCGACCGCACUUGCAUGCGGCCGGUGGUCCUGC	hsa-miR-4281_MIMAT0016907_Homo_sapiens_miR-4281	GGGUCCCGGGGAGGGGGG	UCCCCUGCUUGGGACCC&GGGUCCCGGGGAGGGGG	.(((((.((((((((((&)))))))))).))))).	23,39	2,18	-17.44	-34.11	10.61	6.06
miRNA:	The specific miRNA which is predicted to target the region.	BFRF1_3'_UTR_	18	88	CUGAGCCACCGAGCGCCCGCUCGGGCUGGCGGCCCCGAAUCCGGGCAGUGCUGCCGCACAACGCGGCCUA	hsa-miR-6727-5p_MIMAT0027355_Homo_sapiens_miR-6727-5p	CUCGGGGCAGGCGGCUGGGAGCG	GCUCGGGCUGGCGGCCCCGA&UCGGGGCAGGCGGCUGGGAGC	((((.(((((.(.(((((((&))))))).).)))))..))))	19,38	3,23	-11.07	-33.12	16.93	5.12
miRNA sequence:	The miRNA sequence, listed 5ʹ to 3ʹ	BFRF1_3'_UTR_	360	430	GUUAUGGCACGCCGGCUGCCCAAGCCCACCCUCCAGGGGAGGCUGGAGGCGGAUUUUCCAGACAGUCCCC	hsa-miR-6791-5p_MIMAT0027482_Homo_sapiens_miR-6791-5p	CCCCUGGGGCUGGGCAGGCGGA	CCGGCUGCCCAAGCCC&GGGCUGGGCAGGCGG	(((.((((((.(((((&))))))))))).)))	12,27	8,22	-14.52	-31.63	9	8.11
duplex sequnce:	The portion of the Target sequence and miRNA sequence which are complementary (e.g. Target_Sequence&miRNA_Sequence)	BFRF1_3'_UTR_	143	213	GACCGCACUUGCAUGCGGCCGGUGGUCCUGCGGGGGGUGACGGUCAGGCAGCUCCUGUAUUUAACUUUGC	hsa-miR-4640-3p_MIMAT0019700_Homo_sapiens_miR-4640-3p	CACCCCCUGUUUCCUGGCCCAC	GGCCGGUGGUCCUGCGGGGGGUG&CACCCCCUGUUUCCUGGCC	((((((.((....((((((((((&)))))))))).))))))))	17,39	2,20	-12.73	-31.58	17.91	0.94
duplex structure:	Dot-bracket notation of the base-pairing between the Target sequence and the miRNA sequence	BFRF1_3'_UTR_	73	143	GCACAACGCGGCCUACGAGCUCGACCGUGGCUCCCGCCUCUUGGAUGCCAUCAUCCCCUGCUUGGGACCC	hsa-miR-663a_MIMAT0003326_Homo_sapiens_miR-663a	AGGCGGGGCGCCGCGGGACCGC	CCGUGGCUCCCGCCU&AGGCGGGGCGCCGCGG	(((((((((((((((&)))))))).)))))))	25,39	2,17	-14.46	-31.43	9.05	7.92
i-j subfragment:	Subfragment positions of the corresponding i-j sequence which is complementary to the miRNA	BFRF1_3'_UTR_	252	322	GCCAAGCUCCAGAGGACGCCCGCGACGAGCCUCACCUGUUCUCCUCCUGUUUAGAGGUAGAAUUGCCACC	hsa-miR-125a-3p_MIMAT0004602_Homo_sapiens_miR-125a-3p	ACAGGUGAGGUUCUUGGGAGCC	GCCCGCGACGAGCCUCACCUGU&ACAGGUGAGGUUCUUGGGAGC	((((.(((.(((((((((((((&)))))))))))))))))).))	18,39	2,22	-20.07	-31.29	6.78	4.44
miRNA subfragment:	Subfragment positions of the corresponding miRNA sequence which is complementary to the Target	BFRF1_3'_UTR_	7	77	CCAGAGGCUGGCUGAGCCACCGAGCGCCCGCUCGGGCUGGCGGCCCCGAAUCCGGGCAGUGCUGCCGCAC	hsa-miR-3940-3p_MIMAT0018356_Homo_sapiens_miR-3940-3p	CAGCCCGGAUCCCAGCCCACUU	GGGCUGGCGGCCCCGAAUCCGGGC&GCCCGGAUCCCAGCCC	(((((((.(.......((((((((&))))))))))))))))	34,57	4,19	-10.46	-30.77	19.03	1.28
interaction energy:	Overall energy for a specific Target-miRNA interaction (interaction energy=duplex energy+break target structure+break miRNA structure)	BFRF1_3'_UTR_	75	145	ACAACGCGGCCUACGAGCUCGACCGUGGCUCCCGCCUCUUGGAUGCCAUCAUCCCCUGCUUGGGACCCGA	hsa-miR-6087_MIMAT0023712_Homo_sapiens_miR-6087	UGAGGCGGGGGGGCGAGC	GCUCGACCGUGGCUCCCGCCUC&GAGGCGGGGGGGCGAGC	(((((.((....((((((((((&)))))))))))))))))	17,38	3,19	-15.46	-30.73	13.1	2.17
duplex energy:	Minimum free energy of a completely complementary Target-miRNA interaction	BFRF1_3'_UTR_	0	70	UGGGCUGCCAGAGGCUGGCUGAGCCACCGAGCGCCCGCUCGGGCUGGCGGCCCCGAAUCCGGGCAGUGCU	hsa-miR-3157-5p_MIMAT0015031_Homo_sapiens_miR-3157-5p	UUCAGCCAGGCUAGUGCAGUCU	GGGCUGCCAGAGGCUGGCUGA&UCAGCCAGGCUAGUGCAGUCU	(((((((...((.((((((((&)))))))).))...)))))))	2,22	3,23	-12.86	-30.07	14.3	2.9
break target structure:	Energy gained from loss of completely complementary base pairs	BFRF1_3'_UTR_	163	233	GGUGGUCCUGCGGGGGGUGACGGUCAGGCAGCUCCUGUAUUUAACUUUGCGGACAGAGGCCAGAGCCGUU	hsa-miR-4700-3p_MIMAT0019797_Homo_sapiens_miR-4700-3p	CACAGGACUGACUCCUCACCCCAGUG	GGGGUGACGGUCAGGCAGCUCCUGU&ACAGGACUGACUCCUCACCCC	(((((((.((((((.....((((((&))))))))))))..)))))))	14,38	3,23	-13.01	-29.84	12.25	4.58
break miRNA structure:	Energy gained from loss of completely complementary base pairs	BFRF1_3'_UTR_	157	227	GCGGCCGGUGGUCCUGCGGGGGGUGACGGUCAGGCAGCUCCUGUAUUUAACUUUGCGGACAGAGGCCAGA	hsa-miR-6882-3p_MIMAT0027665_Homo_sapiens_miR-6882-3p	UGCUGCCUCUCCUCUUGCCUGCAG	UGCGGGGGGUGACGGUCAGGCAGC&GCUGCCUCUCCUCUUGCCUGCA	((((((.((.((.((..(((((((&)))))))..)))))).))))))	15,38	3,24	-11.9	-29.62	15.02	2.7
		BFRF1_3'_UTR_	0	70	UGGGCUGCCAGAGGCUGGCUGAGCCACCGAGCGCCCGCUCGGGCUGGCGGCCCCGAAUCCGGGCAGUGCU	hsa-miR-6858-3p_MIMAT0027617_Homo_sapiens_miR-6858-3p	CAGCCAGCCCCUGCUCACCCCU	GGGCUGCCAGAGGCUGGCUG&CAGCCAGCCCCUGCUCACCCC	(((.((.(((.(((((((((&))))))))).)))..))))).	2,21	2,22	-13.34	-29.26	14.12	1.8
		BFRF1_3'_UTR_	350	420	UAUCAGACGCGUUAUGGCACGCCGGCUGCCCAAGCCCACCCUCCAGGGGAGGCUGGAGGCGGAUUUUCCA	hsa-miR-4674_MIMAT0019756_Homo_sapiens_miR-4674	CUGGGCUCGGGACGCGCGGCU	GCCGGCUGCCCAAGCCCA&UGGGCUCGGGACGCGCGGC	((((((..(((.((((((&)))))).)))..)).))))	21,38	3,21	-13.38	-28.73	9.89	5.45
		BFRF1_3'_UTR_	544	606	UGCAGAGGACUUUUGGGGUGCCUCGGCGCCAACGCGCCAUAGACAAGAGGCAGAGAGCCAGU	hsa-miR-4634_MIMAT0019691_Homo_sapiens_miR-4634	CGGCGCGACCGGCCCGGGG	CCUCGGCGCCAACGCGCC&GGCGCGACCGGCCCGGGG	((((((.(((..((((((&))))))...)))))))))	21,38	3,20	-5.73	-28.71	16.25	6.74
		BFRF1_3'_UTR_	70	140	GCCGCACAACGCGGCCUACGAGCUCGACCGUGGCUCCCGCCUCUUGGAUGCCAUCAUCCCCUGCUUGGGA	hsa-miR-6726-5p_MIMAT0027353_Homo_sapiens_miR-6726-5p	CGGGAGCUGGGGUCUGCAGGU	ACGAGCUCGACCGUGGCUCCCG&CGGGAGCUGGGGUCUGCAGGU	((..((..((((.(((((((((&))))))))).)))).))..))	18,39	2,22	-15.41	-28.55	10.48	2.67
		BFRF1_3'_UTR_	373	443	GGCUGCCCAAGCCCACCCUCCAGGGGAGGCUGGAGGCGGAUUUUCCAGACAGUCCCCUGCUUCCUAAAUU	hsa-miR-1281_MIMAT0005939_Homo_sapiens_miR-1281	UCGCCUCCUCCUCUCCC	GGGGAGGCUGGAGGCG&CGCCUCCUCCUCUCC	(((((((..(((((((&))))))).)))))))	23,38	3,17	-9.92	-28.5	18.58	0.01
		BFRF1_3'_UTR_	16	86	GGCUGAGCCACCGAGCGCCCGCUCGGGCUGGCGGCCCCGAAUCCGGGCAGUGCUGCCGCACAACGCGGCC	hsa-miR-6762-5p_MIMAT0027424_Homo_sapiens_miR-6762-5p	CGGGGCCAUGGAGCAGCCUGUGU	CUCGGGCUGGCGGCCCCG&CGGGGCCAUGGAGCAGCCUGUG	..................&......................	22,39	2,23	-8.76	-28.45	15.15	4.54
		BFRF1_3'_UTR_	352	422	UCAGACGCGUUAUGGCACGCCGGCUGCCCAAGCCCACCCUCCAGGGGAGGCUGGAGGCGGAUUUUCCAGA	hsa-miR-6769b-5p_MIMAT0027620_Homo_sapiens_miR-6769b-5p	UGGUGGGUGGGGAGGAGAAGUGC	GCACGCCGGCUGCCCAAGCCCACC&GGUGGGUGGGGAGGAGAAGUGC	((((..(..((.(((..(((((((&)))))))))).))..)..))))	15,38	3,24	-14.03	-28.28	14.21	0.04
		BFRF1_3'_UTR_	352	422	UCAGACGCGUUAUGGCACGCCGGCUGCCCAAGCCCACCCUCCAGGGGAGGCUGGAGGCGGAUUUUCCAGA	hsa-miR-6769a-5p_MIMAT0027438_Homo_sapiens_miR-6769a-5p	AGGUGGGUAUGGAGGAGCCCU	GGCUGCCCAAGCCCACC&GGUGGGUAUGGAGGAGCC	((((.((((.(((((((&))))))).))).).))))	22,38	3,20	-12.2	-27.94	10.35	5.39
		BFRF1_3'_UTR_	263	333	GAGGACGCCCGCGACGAGCCUCACCUGUUCUCCUCCUGUUUAGAGGUAGAAUUGCCACCUGGUGAGCGGU	hsa-miR-4459_MIMAT0018981_Homo_sapiens_miR-4459	CCAGGAGGCGGAGGAGGUGGAG	UCACCUGUUCUCCUCCUG&CAGGAGGCGGAGGAGGUGG	.(((((.(((((((((((&))))))).)))).))))).	21,38	3,21	-16.71	-27.44	9.14	1.58
		BFRF1_3'_UTR_	73	143	GCACAACGCGGCCUACGAGCUCGACCGUGGCUCCCGCCUCUUGGAUGCCAUCAUCCCCUGCUUGGGACCC	hsa-miR-6787-5p_MIMAT0027474_Homo_sapiens_miR-6787-5p	UGGCGGGGGUAGAGCUGGCUGC	GCGGCCUACGAGCUCGACCGUGGC&GCGGGGGUAGAGCUGGCUGC	((((((....(((((.(((.(.((&)).).))).)))))))))))	8,31	4,23	-11.09	-27.33	10.4	5.85
		BFRF1_3'_UTR_	33	103	CCCGCUCGGGCUGGCGGCCCCGAAUCCGGGCAGUGCUGCCGCACAACGCGGCCUACGAGCUCGACCGUGG	hsa-miR-383-3p_MIMAT0026485_Homo_sapiens_miR-383-3p	ACAGCACUGCCUGGUCAGA	CCGGGCAGUGCUG&CAGCACUGCCUGG	(((((((((((((&)))))))))))))	26,38	3,15	-16.45	-27.3	9.26	1.59
		BFRF1_3'_UTR_	96	166	ACCGUGGCUCCCGCCUCUUGGAUGCCAUCAUCCCCUGCUUGGGACCCGACCGCACUUGCAUGCGGCCGGU	hsa-miR-6722-3p_MIMAT0025854_Homo_sapiens_miR-6722-3p	UGCAGGGGUCGGGUGGGCCAGG	CUUGGAUGCCAUCAUCCCCUGC&GCAGGGGUCGGGUGGGCCAGG	(((((...(((((..(((((((&)))))))...))))).)))))	17,38	3,23	-11.61	-27.16	10.07	5.48
		BFRF1_3'_UTR_	350	420	UAUCAGACGCGUUAUGGCACGCCGGCUGCCCAAGCCCACCCUCCAGGGGAGGCUGGAGGCGGAUUUUCCA	hsa-miR-1587_MIMAT0019077_Homo_sapiens_miR-1587	UUGGGCUGGGCUGGGUUGGG	CCGGCUGCCCAAGCCCA&UGGGCUGGGCUGGGUUGG	((((((((((.((((((&))))))))))..))))))	22,38	3,20	-14.66	-27.05	9.71	2.67
		BFRF1_3'_UTR_	70	140	GCCGCACAACGCGGCCUACGAGCUCGACCGUGGCUCCCGCCUCUUGGAUGCCAUCAUCCCCUGCUUGGGA	hsa-miR-6827-5p_MIMAT0027554_Homo_sapiens_miR-6827-5p	UGGGAGCCAUGAGGGUCUGUGC	UACGAGCUCGACCGUGGCUCCC&GGGAGCCAUGAGGGUCUGUG	((((.((((...((((((((((&)))))))))).)))).))))	17,38	3,22	-11.02	-26.93	10.41	5.49
		BFRF1_3'_UTR_	70	140	GCCGCACAACGCGGCCUACGAGCUCGACCGUGGCUCCCGCCUCUUGGAUGCCAUCAUCCCCUGCUUGGGA	hsa-miR-6090_MIMAT0023715_Homo_sapiens_miR-6090	GGGGAGCGAGGGGCGGGGC	UCCCGCCUCUUGGAUGCC&GGGGAGCGAGGGGCGGGG	.(((((((((((..(.((&)).)..))))))))))).	35,52	2,19	-17.15	-26.9	8.08	1.67
		BFRF1_3'_UTR_	95	165	GACCGUGGCUCCCGCCUCUUGGAUGCCAUCAUCCCCUGCUUGGGACCCGACCGCACUUGCAUGCGGCCGG	hsa-miR-6798-5p_MIMAT0027496_Homo_sapiens_miR-6798-5p	CCAGGGGGAUGGGCGAGCUUGGG	CCGUGGCUCCCGCCUCUUGG&CCAGGGGGAUGGGCGAGCUUGG	(((.((((((((((((((((&)))))))).))))..)))))))	3,22	2,23	-11.1	-26.89	10.56	5.23
		BFRF1_3'_UTR_	155	225	AUGCGGCCGGUGGUCCUGCGGGGGGUGACGGUCAGGCAGCUCCUGUAUUUAACUUUGCGGACAGAGGCCA	hsa-miR-6894-3p_MIMAT0027689_Homo_sapiens_miR-6894-3p	UUGCCUGCCCUCUUCCUCCAG	GGGGGGUGACGGUCAGGCA&UGCCUGCCCUCUUCCUCC	((((((.((.((.((((((&)))))))).)).))))))	20,38	3,20	-13.03	-26.04	12.92	0.09
		BFRF1_3'_UTR_	210	280	UGCGGACAGAGGCCAGAGCCGUUUGCUCCAUCUGUCAGCAACGCCAAGCUCCAGAGGACGCCCGCGACGA	hsa-miR-4526_MIMAT0019065_Homo_sapiens_miR-4526	GCUGACAGCAGGGCUGGCCGCU	AGCCGUUUGCUCCAUCUGUCAGC&GCUGACAGCAGGGCUGGCCGCU	(((.(((.((.((..((((((((&))))))))..)))).))).)))	17,39	2,23	-7.69	-26.02	12.2	6.13
		BFRF1_3'_UTR_	487	557	AGGCUCAAAGAAGUUACCUGGUAUUUCUGACAUCCCAGUUCUGCUACGAAGAGUACGUGCAGAGGACUUU	hsa-miR-6506-5p_MIMAT0025468_Homo_sapiens_miR-6506-5p	ACUGGGAUGUCACUGAAUAUGGU	ACCUGGUAUUUCUGACAUCCCAGU&ACUGGGAUGUCACUGAAUAUGGU	(((..((((((.((((((((((((&))))))))))))..)))))))))	16,39	2,24	-18.94	-25.68	5.91	0.82
		BFRF1_3'_UTR_	16	86	GGCUGAGCCACCGAGCGCCCGCUCGGGCUGGCGGCCCCGAAUCCGGGCAGUGCUGCCGCACAACGCGGCC	hsa-miR-128-1-5p_MIMAT0026477_Homo_sapiens_miR-128-1-5p	CGGGGCCGUAGCACUGUCUGAGA	GCUGGCGGCCCCG&CGGGGCCGUAGC	(((.(((((((((&))))))))))))	27,39	2,13	-13.31	-25.48	9.15	3.01
		BFRF1_3'_UTR_	192	262	AGCUCCUGUAUUUAACUUUGCGGACAGAGGCCAGAGCCGUUUGCUCCAUCUGUCAGCAACGCCAAGCUCC	hsa-miR-760_MIMAT0004957_Homo_sapiens_miR-760	CGGCUCUGGGUCUGUGGGGA	ACAGAGGCCAGAGCCG&CGGCUCUGGGUCUGU	(((((..(((((((((&))))))))).)))))	24,39	2,16	-12.25	-25.38	10.27	2.86
		BFRF1_3'_UTR_	92	162	CUCGACCGUGGCUCCCGCCUCUUGGAUGCCAUCAUCCCCUGCUUGGGACCCGACCGCACUUGCAUGCGGC	hsa-miR-5187-5p_MIMAT0021117_Homo_sapiens_miR-5187-5p	UGGGAUGAGGGAUUGAAGUGGA	CCUCUUGGAUGCCAUCAUCCC&GGGAUGAGGGAUUGAAGUGG	((.(((.(((.((.(((((((&))))))))).))).))).))	18,38	3,22	-17.06	-25.15	8	0.1
		BFRF1_3'_UTR_	248	318	CAACGCCAAGCUCCAGAGGACGCCCGCGACGAGCCUCACCUGUUCUCCUCCUGUUUAGAGGUAGAAUUGC	hsa-miR-6765-5p_MIMAT0027430_Homo_sapiens_miR-6765-5p	GUGAGGCGGGGCCAGGAGGGUGUGU	ACGCCCGCGACGAGCCUCACCU&AGGCGGGGCCAGGAGGGUGU	((((((....(..(((((.(((&))).)))))..)..))))))	20,41	5,24	-12.66	-25.09	7.2	5.24
		BFRF1_3'_UTR_	261	331	CAGAGGACGCCCGCGACGAGCCUCACCUGUUCUCCUCCUGUUUAGAGGUAGAAUUGCCACCUGGUGAGCG	hsa-miR-765_MIMAT0003945_Homo_sapiens_miR-765	UGGAGGAGAAGGAAGGUGAUG	UCACCUGUUCUCCUCC&GGAGGAGAAGGAAGGUGA	((((((.(((((((((&)))))))))...))))))	23,38	3,20	-16.03	-25.01	8.97	0.01
		BFRF1_3'_UTR_	0	70	UGGGCUGCCAGAGGCUGGCUGAGCCACCGAGCGCCCGCUCGGGCUGGCGGCCCCGAAUCCGGGCAGUGCU	hsa-miR-6786-5p_MIMAT0027472_Homo_sapiens_miR-6786-5p	GCGGUGGGGCCGGAGGGGCGU	GCUGGCGGCCCCGAAUCCG&CGGUGGGGCCGGAGGGGC	(((..((((((((...(((&)))))))))))....)))	43,61	3,20	-9.15	-24.98	10.35	5.49
		BFRF1_3'_UTR_	126	196	UCCCCUGCUUGGGACCCGACCGCACUUGCAUGCGGCCGGUGGUCCUGCGGGGGGUGACGGUCAGGCAGCU	hsa-miR-1908-3p_MIMAT0026916_Homo_sapiens_miR-1908-3p	CCGGCCGCCGGCUCCGCCCCG	GGGGUGACGGUCAGGCAGCU&GGCCGCCGGCUCCGCCCC	((((((..((((.(((.(((&))).))))))).))))))	51,70	4,21	-9.19	-24.9	11.09	4.62
		BFRF1_3'_UTR_	399	469	AGGCUGGAGGCGGAUUUUCCAGACAGUCCCCUGCUUCCUAAAUUUCAAGAGCUGAACCAGAAUAAUCUCC	hsa-miR-671-5p_MIMAT0003880_Homo_sapiens_miR-671-5p	AGGAAGCCCUGGAGGGGCUGGAG	CAGUCCCCUGCUUCCU&AGGAAGCCCUGGAGGGGCUG	((((((((((((((((&)))))))...)).)))))))	24,39	2,21	-8.79	-24.81	6.95	9.07
		BFRF1_3'_UTR_	97	167	CCGUGGCUCCCGCCUCUUGGAUGCCAUCAUCCCCUGCUUGGGACCCGACCGCACUUGCAUGCGGCCGGUG	hsa-miR-6510-5p_MIMAT0025476_Homo_sapiens_miR-6510-5p	CAGCAGGGGAGAGAGAGGAGUC	CCUCUUGGAUGCCAUCAUCCCCUGC&GCAGGGGAGAGAGAGG	((((((........((.((((((((&))))))))))))))))	13,37	4,19	-13.59	-24.67	10.92	0.17
		BFRF1_3'_UTR_	28	98	GAGCGCCCGCUCGGGCUGGCGGCCCCGAAUCCGGGCAGUGCUGCCGCACAACGCGGCCUACGAGCUCGAC	hsa-miR-324-3p_MIMAT0000762_Homo_sapiens_miR-324-3p	ACUGCCCCAGGUGCUGCUGG	GGCGGCCCCGAAUCCGGGCAGU&ACUGCCCCAGGUGCUGCU	((((((.((......(((((((&)))))))..)).))))))	18,39	2,19	-7	-24.55	12.92	4.63
		BFRF1_3'_UTR_	51	121	CCCGAAUCCGGGCAGUGCUGCCGCACAACGCGGCCUACGAGCUCGACCGUGGCUCCCGCCUCUUGGAUGC	hsa-miR-6806-5p_MIMAT0027512_Homo_sapiens_miR-6806-5p	UGUAGGCAUGAGGCAGGGCCCAGG	CCGUGGCUCCCGCCUCUUGGAUGC&GUAGGCAUGAGGCAGGGCCCAGG	((..(((.((.(((((.((..(((&)))..)).))))).)))))..))	47,70	3,25	-13.62	-24.52	6.97	3.93
		BFRF1_3'_UTR_	237	307	CCAUCUGUCAGCAACGCCAAGCUCCAGAGGACGCCCGCGACGAGCCUCACCUGUUCUCCUCCUGUUUAGA	hsa-miR-4767_MIMAT0019919_Homo_sapiens_miR-4767	CGCGGGCGCUCCUGGCCGCCGCC	AGGACGCCCGCG&CGCGGGCGCUCCU	((((((((((((&)))))))).))))	28,39	2,14	-10.91	-24.51	5.47	8.13
		BFRF1_3'_UTR_	28	98	GAGCGCCCGCUCGGGCUGGCGGCCCCGAAUCCGGGCAGUGCUGCCGCACAACGCGGCCUACGAGCUCGAC	hsa-miR-1913_MIMAT0007888_Homo_sapiens_miR-1913	UCUGCCCCCUCCGCUGCUGCCA	UGGCGGCCCCGAAUCCGGGCAG&CUGCCCCCUCCGCUGCUGCCA	(((((((..((.....((((((&))))))....))..)))))))	17,38	3,23	-10.32	-24.45	12.88	1.25
		BFRF1_3'_UTR_	536	606	AGAGUACGUGCAGAGGACUUUUGGGGUGCCUCGGCGCCAACGCGCCAUAGACAAGAGGCAGAGAGCCAGU	hsa-miR-566_MIMAT0003230_Homo_sapiens_miR-566	GGGCGCCUGUGAUCCCAAC	UUGGGGUGCCUCGGCGCC&GGCGCCUGUGAUCCCAA	.((((((..(..((((((&)))))).)..)))))).	21,38	3,19	-5.35	-24.38	16.02	3.01
		BFRF1_3'_UTR_	360	430	GUUAUGGCACGCCGGCUGCCCAAGCCCACCCUCCAGGGGAGGCUGGAGGCGGAUUUUCCAGACAGUCCCC	hsa-miR-4292_MIMAT0016919_Homo_sapiens_miR-4292	CCCCUGGGCCGGCCUUGG	CCAAGCCCACCCUCCAGGGG&CCCCUGGGCCGGCCUUGG	(((((.((....((((((((&))))))))..)).)))))	20,39	2,19	-7.95	-24.26	12.47	3.84
		BFRF1_3'_UTR_	249	319	AACGCCAAGCUCCAGAGGACGCCCGCGACGAGCCUCACCUGUUCUCCUCCUGUUUAGAGGUAGAAUUGCC	hsa-miR-4316_MIMAT0016867_Homo_sapiens_miR-4316	GGUGAGGCUAGCUGGUG	CGCCCGCGACGAGCCUCACC&GGUGAGGCUAGCUGGUG	((((.((....(((((((((&))))))))).)).))))	20,39	2,18	-16.93	-24.18	6.48	0.76
		BFRF1_3'_UTR_	353	423	CAGACGCGUUAUGGCACGCCGGCUGCCCAAGCCCACCCUCCAGGGGAGGCUGGAGGCGGAUUUUCCAGAC	hsa-miR-6756-5p_MIMAT0027412_Homo_sapiens_miR-6756-5p	AGGGUGGGGCUGGAGGUGGGGCU	AGCCCACCCUCCAG&CUGGAGGUGGGGCU	(((((..(((((((&)))))))..)))))	30,43	11,24	-13.29	-24.16	7.49	3.38
		BFRF1_3'_UTR_	73	143	GCACAACGCGGCCUACGAGCUCGACCGUGGCUCCCGCCUCUUGGAUGCCAUCAUCCCCUGCUUGGGACCC	hsa-miR-1908-5p_MIMAT0007881_Homo_sapiens_miR-1908-5p	CGGCGGGGACGGCGAUUGGUC	GACCGUGGCUCCCGCC&GGCGGGGACGGCGAUUGGUC	((((((.(((((((((&))))))...))).)).))))	23,38	3,22	-9.69	-24.15	9.32	5.14
		BFRF1_3'_UTR_	357	427	CGCGUUAUGGCACGCCGGCUGCCCAAGCCCACCCUCCAGGGGAGGCUGGAGGCGGAUUUUCCAGACAGUC	hsa-miR-4443_MIMAT0018961_Homo_sapiens_miR-4443	UUGGAGGCGUGGGUUUU	AAGCCCACCCUCCA&UGGAGGCGUGGGUUU	((((((((((((((&)))))).))))))))	25,38	3,17	-14.76	-24.1	7.52	1.82
		BFRF1_3'_UTR_	201	271	AUUUAACUUUGCGGACAGAGGCCAGAGCCGUUUGCUCCAUCUGUCAGCAACGCCAAGCUCCAGAGGACGC	hsa-miR-6081_MIMAT0023706_Homo_sapiens_miR-6081	AGGAGCAGUGCCGGCCAAGGCGCC	GCCAGAGCCGUUUGCUCC&GGAGCAGUGCCGGCCAAGGC	(((...((((.(((((((&)))))))...))))...)))	21,38	3,22	-9.7	-24.05	5.84	8.51
		BFRF1_3'_UTR_	235	305	CUCCAUCUGUCAGCAACGCCAAGCUCCAGAGGACGCCCGCGACGAGCCUCACCUGUUCUCCUCCUGUUUA	hsa-miR-1268b_MIMAT0018925_Homo_sapiens_miR-1268b	CGGGCGUGGUGGUGGGGGUG	ACGCCCGCGACGAGCCU&GGGCGUGGUGGUGGGGGU	((.(((((.((.(((((&)))).).)).))))).))	33,49	3,20	-18.43	-23.98	4.46	1.09
		BFRF1_3'_UTR_	261	331	CAGAGGACGCCCGCGACGAGCCUCACCUGUUCUCCUCCUGUUUAGAGGUAGAAUUGCCACCUGGUGAGCG	hsa-miR-766-5p_MIMAT0022714_Homo_sapiens_miR-766-5p	AGGAGGAAUUGGUGCUGGUCUU	GACGAGCCUCACCUGUUCUCCUCCU&AGGAGGAAUUGGUGCUGGUC	(((.(((...(((.((..(((((((&))))))))).)))))).)))	15,39	2,21	-12.23	-23.79	10.68	0.88
		BFRF1_3'_UTR_	346	416	UCUCUAUCAGACGCGUUAUGGCACGCCGGCUGCCCAAGCCCACCCUCCAGGGGAGGCUGGAGGCGGAUUU	hsa-miR-6774-5p_MIMAT0027448_Homo_sapiens_miR-6774-5p	ACUUGGGCAGGAGGGACCCUGUAUG	CGUUAUGGCACGCCGGCUGCCCAAG&CUUGGGCAGGAGGGACCCUGUAUG	.........................&........................	14,38	3,26	-6.21	-23.78	10.78	6.79
		BFRF1_3'_UTR_	190	260	GCAGCUCCUGUAUUUAACUUUGCGGACAGAGGCCAGAGCCGUUUGCUCCAUCUGUCAGCAACGCCAAGCU	hsa-miR-330-5p_MIMAT0004693_Homo_sapiens_miR-330-5p	UCUCUGGGCCUGUGUCUUAGGC	GGACAGAGGCCAGAG&CUCUGGGCCUGUGUCU	(((((.(((((((((&)))))).))).)))))	24,38	3,18	-6.26	-23.7	12.23	5.21
		BFRF1_3'_UTR_	136	206	GGGACCCGACCGCACUUGCAUGCGGCCGGUGGUCCUGCGGGGGGUGACGGUCAGGCAGCUCCUGUAUUUA	hsa-miR-1286_MIMAT0005877_Homo_sapiens_miR-1286	UGCAGGACCAAGAUGAGCCCU	GGCCGGUGGUCCUGC&GCAGGACCAAGAUGAGCC	(((((.(((((((((&)))))))))...)).)))	24,38	3,20	-8.29	-23.6	13.65	1.66
		BFRF1_3'_UTR_	8	78	CAGAGGCUGGCUGAGCCACCGAGCGCCCGCUCGGGCUGGCGGCCCCGAAUCCGGGCAGUGCUGCCGCACA	hsa-miR-4690-3p_MIMAT0019780_Homo_sapiens_miR-4690-3p	GCAGCCCAGCUGAGGCCUCUG	CAGAGGCUGGCUGAGC&GCCCAGCUGAGGCCUCUG	(((((((((((((.((&)).)))))..))))))))	1,16	5,22	-13.44	-23.58	6.13	4.01
		BFRF1_3'_UTR_	47	117	CGGCCCCGAAUCCGGGCAGUGCUGCCGCACAACGCGGCCUACGAGCUCGACCGUGGCUCCCGCCUCUUGG	hsa-miR-3648_MIMAT0018068_Homo_sapiens_miR-3648	AGCCGCGGGGAUCGCCGAGGG	CCUACGAGCUCGACCGUGGCU&AGCCGCGGGGAUCGCCGAGG	(((.((.((((..((((((((&)))))))).))..)))))))	38,58	2,21	-6.31	-23.53	9.87	7.35
		BFRF1_3'_UTR_	138	208	GACCCGACCGCACUUGCAUGCGGCCGGUGGUCCUGCGGGGGGUGACGGUCAGGCAGCUCCUGUAUUUAAC	hsa-miR-6886-5p_MIMAT0027672_Homo_sapiens_miR-6886-5p	CCCGCAGGUGAGAUGAGGGCU	GGCCGGUGGUCCUGCGGG&CCCGCAGGUGAGAUGAGGGCU	((((......((((((((&)))))))).........))))	22,39	2,22	-5.28	-23.45	13.59	4.58
		BFRF1_3'_UTR_	342	412	GCCGUCUCUAUCAGACGCGUUAUGGCACGCCGGCUGCCCAAGCCCACCCUCCAGGGGAGGCUGGAGGCGG	hsa-miR-885-3p_MIMAT0004948_Homo_sapiens_miR-885-3p	AGGCAGCGGGGUGUAGUGGAUA	GCACGCCGGCUGCC&GGCAGCGGGGUGU	((((.((.((((((&)))))).))))))	25,38	3,15	-14.2	-23.42	7.89	1.33
		BFRF1_3'_UTR_	155	225	AUGCGGCCGGUGGUCCUGCGGGGGGUGACGGUCAGGCAGCUCCUGUAUUUAACUUUGCGGACAGAGGCCA	hsa-miR-6514-3p_MIMAT0025485_Homo_sapiens_miR-6514-3p	CUGCCUGUUCUUCCACUCCAG	GGGGUGACGGUCAGGCAG&CUGCCUGUUCUUCCACUCC	((((((..((.(((((((&)))))))..))..))))))	22,39	2,20	-11.17	-23.25	11.74	0.34
		BFRF1_3'_UTR_	560	606	GGUGCCUCGGCGCCAACGCGCCAUAGACAAGAGGCAGAGAGCCAGU	hsa-miR-5001-3p_MIMAT0021022_Homo_sapiens_miR-5001-3p	UUCUGCCUCUGUCCAGGUCCUU	GCCAUAGACAAGAGGCAGA&UCUGCCUCUGUCCAGGU	(((...(((.(((((((((&))))))))))))..)))	20,38	3,19	-12.53	-23.24	7.88	2.82
		BFRF1_3'_UTR_	250	320	ACGCCAAGCUCCAGAGGACGCCCGCGACGAGCCUCACCUGUUCUCCUCCUGUUUAGAGGUAGAAUUGCCA	hsa-miR-4710_MIMAT0019815_Homo_sapiens_miR-4710	GGGUGAGGGCAGGUGGUU	UCACCUGUUCUCCUCC&GGGUGAGGGCAGGUGG	.((((((((((((((.&))).))))))))))).	34,49	2,17	-17.14	-23.23	5.74	0.35
		BFRF1_3'_UTR_	0	70	UGGGCUGCCAGAGGCUGGCUGAGCCACCGAGCGCCCGCUCGGGCUGGCGGCCCCGAAUCCGGGCAGUGCU	hsa-miR-24-3p_MIMAT0000080_Homo_sapiens_miR-24-3p	UGGCUCAGUUCAGCAGGAACAG	GCUGGCUGAGCCA&UGGCUCAGUUCAGC	(((((((((((((&))))))))).))))	14,26	2,15	-11.84	-23.15	8.44	2.86
		BFRF1_3'_UTR_	262	332	AGAGGACGCCCGCGACGAGCCUCACCUGUUCUCCUCCUGUUUAGAGGUAGAAUUGCCACCUGGUGAGCGG	hsa-miR-4695-5p_MIMAT0019788_Homo_sapiens_miR-4695-5p	CAGGAGGCAGUGGGCGAGCAGG	CGCCCGCGACGAGCCUCACCUG&CAGGAGGCAGUGGGCG	(((((((.....((((..((((&)))))))).)))))))	7,28	2,17	-16	-22.99	5.5	1.49
		BFRF1_3'_UTR_	300	370	GUUUAGAGGUAGAAUUGCCACCUGGUGAGCGGUGUGCGGGCUGCCGUCUCUAUCAGACGCGUUAUGGCAC	ebv-miR-BART11-3p_MIMAT0003422	ACGCACACCAGGCUGACUGCC	GGUAGAAUUGCCACCUGGUGAGCG&CGCACACCAGGCUGACUGCC	(((((....(((...(((((.(((&))).))))))))...)))))	8,31	3,22	-10.66	-22.96	8.91	3.39
		BFRF1_3'_UTR_	536	606	AGAGUACGUGCAGAGGACUUUUGGGGUGCCUCGGCGCCAACGCGCCAUAGACAAGAGGCAGAGAGCCAGU	hsa-miR-6789-3p_MIMAT0027479_Homo_sapiens_miR-6789-3p	CGGCGCCCGUGUCUCCUCCAG	GAGGACUUUUGGGGUGCC&GGCGCCCGUGUCUCCUC	(((((......(((((((&))))))).....)))))	13,30	3,19	-11.41	-22.92	9.43	2.08
		BFRF1_3'_UTR_	247	317	GCAACGCCAAGCUCCAGAGGACGCCCGCGACGAGCCUCACCUGUUCUCCUCCUGUUUAGAGGUAGAAUUG	hsa-miR-2467-5p_MIMAT0019952_Homo_sapiens_miR-2467-5p	UGAGGCUCUGUUAGCCUUGGCUC	GCCCGCGACGAGCCUCA&UGAGGCUCUGUUAGCCUUGGC	(((.(((((((((((((&)))))))).))).))...)))	23,39	2,22	-9.94	-22.9	5.82	7.14
		BFRF1_3'_UTR_	369	439	CGCCGGCUGCCCAAGCCCACCCUCCAGGGGAGGCUGGAGGCGGAUUUUCCAGACAGUCCCCUGCUUCCUA	hsa-miR-6512-3p_MIMAT0025481_Homo_sapiens_miR-6512-3p	UUCCAGCCCUUCUAAUGGUAGG	CCUCCAGGGGAGGCUGG&CCAGCCCUUCUAAUGGUAGG	((((((.((((((((((&)))))).))))..))).)))	21,37	4,23	-6.79	-22.82	13.22	2.81
		BFRF1_3'_UTR_	37	107	CUCGGGCUGGCGGCCCCGAAUCCGGGCAGUGCUGCCGCACAACGCGGCCUACGAGCUCGACCGUGGCUCC	hsa-miR-6820-5p_MIMAT0027540_Homo_sapiens_miR-6820-5p	UGCGGCAGAGCUGGGGUCA	GGCCUACGAGCUCGACCGU&GCGGCAGAGCUGGGGUC	((((..(.(((((..((((&))))..))))).)))))	46,64	3,19	-11.55	-22.82	7.83	3.44
		BFRF1_3'_UTR_	349	419	CUAUCAGACGCGUUAUGGCACGCCGGCUGCCCAAGCCCACCCUCCAGGGGAGGCUGGAGGCGGAUUUUCC	hsa-miR-27a-5p_MIMAT0004501_Homo_sapiens_miR-27a-5p	AGGGCUUAGCUGCUUGUGAGCA	GCACGCCGGCUGCCCAAGCCC&GGGCUUAGCUGCUUGUGAGC	((.(((.(((.((..((((((&)))))).)).))).))).))	18,38	3,22	-5.67	-22.67	11.92	5.08
		BFRF1_3'_UTR_	396	466	GGGAGGCUGGAGGCGGAUUUUCCAGACAGUCCCCUGCUUCCUAAAUUUCAAGAGCUGAACCAGAAUAAUC	hsa-miR-6510-5p_MIMAT0025476_Homo_sapiens_miR-6510-5p	CAGCAGGGGAGAGAGAGGAGUC	UUCCAGACAGUCCCCUGCU&AGCAGGGGAGAGAGAGGAG	.(((...(..(((((((((&)))))))))..)...))).	20,38	3,21	-11.93	-22.54	10.44	0.17
		BFRF1_3'_UTR_	535	605	AAGAGUACGUGCAGAGGACUUUUGGGGUGCCUCGGCGCCAACGCGCCAUAGACAAGAGGCAGAGAGCCAG	hsa-miR-3195_MIMAT0015079_Homo_sapiens_miR-3195	CGCGCCGGGCCCGGGUU	GGUGCCUCGGCGC&GCGCCGGGCCC	((.(((.((((((&)))))))))))	26,38	3,13	-3.71	-22.53	14.8	4.02
		BFRF1_3'_UTR_	96	166	ACCGUGGCUCCCGCCUCUUGGAUGCCAUCAUCCCCUGCUUGGGACCCGACCGCACUUGCAUGCGGCCGGU	hsa-miR-1909-3p_MIMAT0007883_Homo_sapiens_miR-1909-3p	CGCAGGGGCCGGGUGCUCACCG	GUGGCUCCCGCCUCU&AGGGGCCGGGUGCUCAC	(((((.(((((((((&)))))).))).)).)))	4,18	5,21	-10.04	-22.46	8.21	4.21
		BFRF1_3'_UTR_	351	421	AUCAGACGCGUUAUGGCACGCCGGCUGCCCAAGCCCACCCUCCAGGGGAGGCUGGAGGCGGAUUUUCCAG	hsa-miR-4417_MIMAT0018929_Homo_sapiens_miR-4417	GGUGGGCUUCCCGGAGGG	CCCUCCAGGGGAG&CUUCCCGGAGGG	((((((.((((((&))))))))))))	38,50	8,19	-9.19	-22.31	9.77	3.35
		BFRF1_3'_UTR_	141	211	CCGACCGCACUUGCAUGCGGCCGGUGGUCCUGCGGGGGGUGACGGUCAGGCAGCUCCUGUAUUUAACUUU	hsa-miR-6840-5p_MIMAT0027582_Homo_sapiens_miR-6840-5p	ACCCCCGGGCAAAGACCUGCAGAU	GGUCCUGCGGGGGGU&ACCCCCGGGCAAAGACC	((((.(((.((((((&))))))..)))..))))	26,40	2,18	-7.3	-22.25	11.18	3.76
		BFRF1_3'_UTR_	356	426	ACGCGUUAUGGCACGCCGGCUGCCCAAGCCCACCCUCCAGGGGAGGCUGGAGGCGGAUUUUCCAGACAGU	hsa-miR-6797-5p_MIMAT0027494_Homo_sapiens_miR-6797-5p	AGGAGGGAAGGGGCUGAGAACAGGA	AGCCCACCCUCC&GGAGGGAAGGGGCU	(((((.((((((&))))))...)))))	27,38	3,16	-13.3	-22.21	7.62	1.28
		BFRF1_3'_UTR_	40	110	GGGCUGGCGGCCCCGAAUCCGGGCAGUGCUGCCGCACAACGCGGCCUACGAGCUCGACCGUGGCUCCCGC	hsa-miR-147b_MIMAT0004928_Homo_sapiens_miR-147b	GUGUGCGGAAAUGCUUCUGCUA	GGCAGUGCUGCCGCACA&UGUGCGGAAAUGCUUCUGCU	(((((.((..(((((((&)))))))....))..)))))	22,38	3,22	-4.18	-22.15	11.45	6.52
		BFRF1_3'_UTR_	486	556	GAGGCUCAAAGAAGUUACCUGGUAUUUCUGACAUCCCAGUUCUGCUACGAAGAGUACGUGCAGAGGACUU	hsa-miR-6728-5p_MIMAT0027357_Homo_sapiens_miR-6728-5p	UUGGGAUGGUAGGACCAGAGGGG	CUGGUAUUUCUGACAUCCCAG&UUGGGAUGGUAGGACCAG	(((((...(((..(((((((.&.)))))))..))))))))	19,39	2,19	-13.64	-22.1	5.47	2.99
		BFRF1_3'_UTR_	160	230	GCCGGUGGUCCUGCGGGGGGUGACGGUCAGGCAGCUCCUGUAUUUAACUUUGCGGACAGAGGCCAGAGCC	hsa-miR-4633-3p_MIMAT0019690_Homo_sapiens_miR-4633-3p	AGGAGCUAGCCAGGCAUAUGCA	GUGACGGUCAGGCAGCUCCU&AGGAGCUAGCCAGGCAUAUGC	....................&.....................	20,39	2,22	-11.79	-21.88	7.67	2.42
		BFRF1_3'_UTR_	247	317	GCAACGCCAAGCUCCAGAGGACGCCCGCGACGAGCCUCACCUGUUCUCCUCCUGUUUAGAGGUAGAAUUG	hsa-miR-3188_MIMAT0015070_Homo_sapiens_miR-3188	AGAGGCUUUGUGCGGAUACGGGG	CCGCGACGAGCCUC&GAGGCUUUGUGCGG	((((.(((((((((&))))))).))))))	25,38	3,16	-14.4	-21.85	4.6	2.85
		BFRF1_3'_UTR_	567	606	CGGCGCCAACGCGCCAUAGACAAGAGGCAGAGAGCCAGU	hsa-miR-3064-5p_MIMAT0019864_Homo_sapiens_miR-3064-5p	UCUGGCUGUUGUGGUGUGCAA	CGCGCCAUAGACAAGAGGCAGA&UCUGGCUGUUGUGGUGUG	((((((....((((.((.((((&)))).)).))))))))))	10,31	2,19	-9.81	-21.79	10.52	1.46
		BFRF1_3'_UTR_	395	465	GGGGAGGCUGGAGGCGGAUUUUCCAGACAGUCCCCUGCUUCCUAAAUUUCAAGAGCUGAACCAGAAUAAU	hsa-miR-6722-3p_MIMAT0025854_Homo_sapiens_miR-6722-3p	UGCAGGGGUCGGGUGGGCCAGG	UCCAGACAGUCCCCUGC&GCAGGGGUCGGGUGGG	.(((..(.(.(((((((&))))))).))..))).	22,38	3,18	-5.39	-21.63	10.77	5.48
		BFRF1_3'_UTR_	235	305	CUCCAUCUGUCAGCAACGCCAAGCUCCAGAGGACGCCCGCGACGAGCCUCACCUGUUCUCCUCCUGUUUA	hsa-miR-1268a_MIMAT0005922_Homo_sapiens_miR-1268a	CGGGCGUGGUGGUGGGGG	CGCCCGCGACGAGCCU&GGGCGUGGUGGUGGGGG	(.(((((.((.(((((&)))).).)).))))).)	34,49	3,19	-17.34	-21.58	3.28	0.96
		BFRF1_3'_UTR_	567	606	CGGCGCCAACGCGCCAUAGACAAGAGGCAGAGAGCCAGU	hsa-miR-149-5p_MIMAT0000450_Homo_sapiens_miR-149-5p	UCUGGCUCCGUGUCUUCACUCCC	GAGGCAGAGAGCCAG&CUGGCUCCGUGUCUU	((((((..(((((((&)))))))..))))))	24,38	3,17	-15.25	-21.53	4.06	2.21
		BFRF1_3'_UTR_	261	331	CAGAGGACGCCCGCGACGAGCCUCACCUGUUCUCCUCCUGUUUAGAGGUAGAAUUGCCACCUGGUGAGCG	hsa-miR-7154-3p_MIMAT0028219_Homo_sapiens_miR-7154-3p	AGGAGGACAAGUUGUGGGAU	CCCGCGACGAGCCUC&GAGGACAAGUUGUGGG	((((((((..(((((&)))).)..))))))))	10,24	4,19	-15.86	-21.5	5.33	0.32
		BFRF1_3'_UTR_	357	427	CGCGUUAUGGCACGCCGGCUGCCCAAGCCCACCCUCCAGGGGAGGCUGGAGGCGGAUUUUCCAGACAGUC	hsa-miR-6515-5p_MIMAT0025486_Homo_sapiens_miR-6515-5p	UUGGAGGGUGUGGAAGACAUC	CCCACCCUCCA&UGGAGGGUGUGG	(((((((((((&))))))))).))	28,38	3,14	-10.66	-21.3	7.52	3.12
		BFRF1_3'_UTR_	396	466	GGGAGGCUGGAGGCGGAUUUUCCAGACAGUCCCCUGCUUCCUAAAUUUCAAGAGCUGAACCAGAAUAAUC	hsa-miR-6165_MIMAT0024782_Homo_sapiens_miR-6165	CAGCAGGAGGUGAGGGGAG	UCCCCUGCUUCCU&AGGAGGUGAGGGGA	(((((((((((((&))))))).))))))	30,42	6,19	-10.59	-21.23	9.73	0.9
		BFRF1_3'_UTR_	222	292	CCAGAGCCGUUUGCUCCAUCUGUCAGCAACGCCAAGCUCCAGAGGACGCCCGCGACGAGCCUCACCUGUU	hsa-miR-4538_MIMAT0019081_Homo_sapiens_miR-4538	GAGCUUGGAUGAGCUGGGCUGA	UCAGCAACGCCAAGCUC&GAGCUUGGAUGAGCUGG	.((((....((((((((&))))))))....)))).	23,39	2,18	-10.06	-21.04	4.67	6.3
		BFRF1_3'_UTR_	396	466	GGGAGGCUGGAGGCGGAUUUUCCAGACAGUCCCCUGCUUCCUAAAUUUCAAGAGCUGAACCAGAAUAAUC	hsa-miR-4690-5p_MIMAT0019779_Homo_sapiens_miR-4690-5p	GAGCAGGCGAGGCUGGGCUGAA	CAGACAGUCCCCUGCU&AGCAGGCGAGGCUGGGCUG	(((.((((((((((((&)))))).).)))))..)))	23,38	3,21	-5.68	-20.99	10.41	4.89
		BFRF1_3'_UTR_	390	460	CUCCAGGGGAGGCUGGAGGCGGAUUUUCCAGACAGUCCCCUGCUUCCUAAAUUUCAAGAGCUGAACCAGA	hsa-miR-4740-5p_MIMAT0019869_Homo_sapiens_miR-4740-5p	AGGACUGAUCCUCUCGGGCAGG	GCUGGAGGCGGAUUUUCC&GGACUGAUCCUCUCGGGC	(((.((((.(((((.(((&)))..))))))))).)))	12,29	3,20	-5.32	-20.86	10.39	5.15
		BFRF1_3'_UTR_	0	70	UGGGCUGCCAGAGGCUGGCUGAGCCACCGAGCGCCCGCUCGGGCUGGCGGCCCCGAAUCCGGGCAGUGCU	hsa-miR-3178_MIMAT0015055_Homo_sapiens_miR-3178	GGGGCGCGGCCGGAUCG	CGAAUCCGGGCAGUGCU&GGCGCGGCCGGAUCG	((.((((((.(.(((((&)))))).))))))))	54,70	4,18	-16.46	-20.76	1.27	3.04
		BFRF1_3'_UTR_	368	438	ACGCCGGCUGCCCAAGCCCACCCUCCAGGGGAGGCUGGAGGCGGAUUUUCCAGACAGUCCCCUGCUUCCU	hsa-miR-6849-3p_MIMAT0027599_Homo_sapiens_miR-6849-3p	ACCAGCCUGUGUCCACCUCCAG	CUGGAGGCGGAUUUUCCAGACAG&CUGUGUCCACCUCCAG	.......................&................	35,57	8,23	-9.67	-20.74	10.55	0.52
		BFRF1_3'_UTR_	547	606	AGAGGACUUUUGGGGUGCCUCGGCGCCAACGCGCCAUAGACAAGAGGCAGAGAGCCAGU	hsa-miR-8074_MIMAT0031001_Homo_sapiens_miR-8074	CUAUGGCGAGACUGGCAUGUACUC	GCCAACGCGCCAUAG&CUAUGGCGAGACUGGC	((((...((((((((&))))))))....))))	25,39	2,17	-8.69	-20.74	8.35	3.7
		BFRF1_3'_UTR_	4	74	CUGCCAGAGGCUGGCUGAGCCACCGAGCGCCCGCUCGGGCUGGCGGCCCCGAAUCCGGGCAGUGCUGCCG	hsa-miR-615-3p_MIMAT0003283_Homo_sapiens_miR-615-3p	UCCGAGCCUGGGUCUCCCUCUU	GAGCGCCCGCUCGG&CCGAGCCUGGGUCUC	(((.((((((((((&))))))..)))))))	25,38	3,17	-5.13	-20.66	12.39	3.14
		BFRF1_3'_UTR_	231	301	UUUGCUCCAUCUGUCAGCAACGCCAAGCUCCAGAGGACGCCCGCGACGAGCCUCACCUGUUCUCCUCCUG	hsa-miR-3909_MIMAT0018183_Homo_sapiens_miR-3909	UGUCCUCUAGGGCCUGCAGUCU	GCCAAGCUCCAGAGGAC&GUCCUCUAGGGCCUGC	.................&................	22,38	3,18	-8.65	-20.62	8.41	3.56
		BFRF1_3'_UTR_	261	331	CAGAGGACGCCCGCGACGAGCCUCACCUGUUCUCCUCCUGUUUAGAGGUAGAAUUGCCACCUGGUGAGCG	hsa-miR-6894-5p_MIMAT0027688_Homo_sapiens_miR-6894-5p	AGGAGGAUGGAGAGCUGGGCCAGA	CCUGUUCUCCUCCU&AGGAUGGAGAGCUGG	((.(((((((((((&)))).))))))).))	26,39	5,19	-12.8	-20.52	6.23	1.49
		BFRF1_3'_UTR_	47	117	CGGCCCCGAAUCCGGGCAGUGCUGCCGCACAACGCGGCCUACGAGCUCGACCGUGGCUCCCGCCUCUUGG	hsa-miR-6869-3p_MIMAT0027639_Homo_sapiens_miR-6869-3p	CGCCGCGCGCAUCGGCUCAGC	GAGCUCGACCGUGGC&GCCGCGCGCAUCGGCUC	((((.((((((((((&)))))).)..)))))))	43,57	3,19	-8.12	-20.51	7.26	5.13
		BFRF1_3'_UTR_	263	333	GAGGACGCCCGCGACGAGCCUCACCUGUUCUCCUCCUGUUUAGAGGUAGAAUUGCCACCUGGUGAGCGGU	hsa-miR-4433a-3p_MIMAT0018949_Homo_sapiens_miR-4433a-3p	ACAGGAGUGGGGGUGGGACAU	CCUGUUCUCCUCCUGU&ACAGGAGUGGGGGUGGG	((((((((((((((((&))))))).)))))))))	24,39	2,18	-13.9	-20.49	6.02	0.57
		BFRF1_3'_UTR_	85	155	CUACGAGCUCGACCGUGGCUCCCGCCUCUUGGAUGCCAUCAUCCCCUGCUUGGGACCCGACCGCACUUGC	hsa-miR-4642_MIMAT0019702_Homo_sapiens_miR-4642	AUGGCAUCGUCCCCUGGUGGCU	CCGCCUCUUGGAUGCCAU&AUGGCAUCGUCCCCUGGUGG	(((((.....((((((((&)))))))).......)))))	22,39	2,21	-5.88	-20.41	9.69	4.83
		BFRF1_3'_UTR_	173	243	CGGGGGGUGACGGUCAGGCAGCUCCUGUAUUUAACUUUGCGGACAGAGGCCAGAGCCGUUUGCUCCAUCU	hsa-miR-548at-5p_MIMAT0022277_Homo_sapiens_miR-548at-5p	AAAAGUUAUUGCGGUUUUGGCU	GCCAGAGCCGUUUGCU&AGUUAUUGCGGUUUUGGC	(((((((((((..(((&)))....)))))))))))	49,64	5,22	-6.5	-20.36	12.3	1.57
		BFRF1_3'_UTR_	16	86	GGCUGAGCCACCGAGCGCCCGCUCGGGCUGGCGGCCCCGAAUCCGGGCAGUGCUGCCGCACAACGCGGCC	hsa-miR-6845-5p_MIMAT0027590_Homo_sapiens_miR-6845-5p	CGGGGCCAGAGCAGAGAGC	GCUGGCGGCCCCG&CGGGGCCAGAGC	(((...(((((((&)))))))..)))	27,39	2,13	-10.36	-20.34	9.15	0.83
		BFRF1_3'_UTR_	250	320	ACGCCAAGCUCCAGAGGACGCCCGCGACGAGCCUCACCUGUUCUCCUCCUGUUUAGAGGUAGAAUUGCCA	hsa-miR-4792_MIMAT0019964_Homo_sapiens_miR-4792	CGGUGAGCGCUCGCUGGC	CGAGCCUCACC&GGUGAGCGCUCG	(((((((((((&)))))).)))))	28,38	3,14	-12.6	-20.3	1.46	6.24
		BFRF1_3'_UTR_	159	229	GGCCGGUGGUCCUGCGGGGGGUGACGGUCAGGCAGCUCCUGUAUUUAACUUUGCGGACAGAGGCCAGAGC	hsa-miR-3160-3p_MIMAT0015034_Homo_sapiens_miR-3160-3p	AGAGCUGAGACUAGAAAGCCCA	GGGUGACGGUCAGGCAGCUC&GAGCUGAGACUAGAAAGCCC	((((...((((...((((((&)))))).)))).....))))	19,38	3,22	-7.32	-20.27	10.76	2.19
		BFRF1_3'_UTR_	239	309	AUCUGUCAGCAACGCCAAGCUCCAGAGGACGCCCGCGACGAGCCUCACCUGUUCUCCUCCUGUUUAGAGG	hsa-miR-3124-5p_MIMAT0014986_Homo_sapiens_miR-3124-5p	UUCGCGGGCGAAGGCAAAGUC	CGCCCGCGA&UCGCGGGCG	(((((((((&)))))))))	30,38	3,11	-15.07	-20.2	2.53	2.6
		BFRF1_3'_UTR_	486	556	GAGGCUCAAAGAAGUUACCUGGUAUUUCUGACAUCCCAGUUCUGCUACGAAGAGUACGUGCAGAGGACUU	hsa-miR-769-3p_MIMAT0003887_Homo_sapiens_miR-769-3p	CUGGGAUCUCCGGGGUCUUGGUU	ACCUGGUAUUUCUGACAUCCCAG&CUGGGAUCUCCGGGGUCUUGGU	(((.((.(((((.((.(((((((&))))))).)).))))))).)))	17,39	2,23	-7.77	-20.12	5.52	6.83
		BFRF1_3'_UTR_	69	139	UGCCGCACAACGCGGCCUACGAGCUCGACCGUGGCUCCCGCCUCUUGGAUGCCAUCAUCCCCUGCUUGGG	hsa-miR-505-5p_MIMAT0004776_Homo_sapiens_miR-505-5p	GGGAGCCAGGAAGUAUUGAUGU	CGUGGCUCCC&GGGAGCCAGG	(.((((((((&)))))))).)	30,39	2,11	-10.69	-20.1	8.85	0.56
		BFRF1_3'_UTR_	411	481	GAUUUUCCAGACAGUCCCCUGCUUCCUAAAUUUCAAGAGCUGAACCAGAAUAAUCUCCCCAAUGAUGUUU	hsa-miR-526b-5p_MIMAT0002835_Homo_sapiens_miR-526b-5p	CUCUUGAGGGAAGCACUUUCUGU	UGCUUCCUAAAUUUCAAGAG&CUCUUGAGGGAAGCA	((((((((.....(((((((&)))))))))))))))	20,39	2,16	-14.36	-20.03	2.96	2.71
		BFRF1_3'_UTR_	356	426	ACGCGUUAUGGCACGCCGGCUGCCCAAGCCCACCCUCCAGGGGAGGCUGGAGGCGGAUUUUCCAGACAGU	hsa-miR-1249-5p_MIMAT0032029_Homo_sapiens_miR-1249-5p	AGGAGGGAGGAGAUGGGCCAAGUU	GCCCACCCUCC&GGAGGGAGGAGAUGGGC	(((((((((((&))))))......)))))	28,38	3,19	-11.33	-20.01	7.62	1.06
		BFRF1_3'_UTR_	260	330	CCAGAGGACGCCCGCGACGAGCCUCACCUGUUCUCCUCCUGUUUAGAGGUAGAAUUGCCACCUGGUGAGC	hsa-miR-3150b-3p_MIMAT0018194_Homo_sapiens_miR-3150b-3p	UGAGGAGAUCGUCGAGGUUGG	CGCCCGCGACGAGCCUCA&UGAGGAGAUCGUCGAGGUUG	..................&....................	9,26	2,21	-12.08	-20.01	6.1	1.83
		BFRF1_3'_UTR_	235	305	CUCCAUCUGUCAGCAACGCCAAGCUCCAGAGGACGCCCGCGACGAGCCUCACCUGUUCUCCUCCUGUUUA	hsa-miR-585-3p_MIMAT0003250_Homo_sapiens_miR-585-3p	UGGGCGUAUCUGUAUGCUA	AGCUCCAGAGGACGCCC&GGGCGUAUCUGUAUGCU	(((..((((..((((((&)))))).))))...)))	22,38	3,19	-6.74	-19.97	8.34	4.88
		BFRF1_3'_UTR_	252	322	GCCAAGCUCCAGAGGACGCCCGCGACGAGCCUCACCUGUUCUCCUCCUGUUUAGAGGUAGAAUUGCCACC	hsa-miR-3934-5p_MIMAT0018349_Homo_sapiens_miR-3934-5p	UCAGGUGUGGAAACUGAGGCAG	GCCUCACCUGUUCUCCUCCUG&CAGGUGUGGAAACUGAGGC	((((((....((((.(.((((&)))).).))))..))))))	29,49	3,21	-8.65	-19.96	8.02	3.29
		BFRF1_3'_UTR_	390	460	CUCCAGGGGAGGCUGGAGGCGGAUUUUCCAGACAGUCCCCUGCUUCCUAAAUUUCAAGAGCUGAACCAGA	hsa-miR-4515_MIMAT0019052_Homo_sapiens_miR-4515	AGGACUGGACUCCCGGCAGCCC	GGCUGGAGGCGGAUUUUCCAG&CUGGACUCCCGGCAGCC	(((((..((.((....(((((&))))))).))..)))))	11,31	6,22	-4.39	-19.93	10.43	5.11
		BFRF1_3'_UTR_	70	140	GCCGCACAACGCGGCCUACGAGCUCGACCGUGGCUCCCGCCUCUUGGAUGCCAUCAUCCCCUGCUUGGGA	hsa-miR-5591-5p_MIMAT0022301_Homo_sapiens_miR-5591-5p	UGGGAGCUAAGCUAUGGGUAU	GCUCGACCGUGGCUCCC&GGGAGCUAAGCUAUGGGU	(((((....((((((((&)))))))).....)))))	22,38	3,20	-8.09	-19.87	10.39	1.38
		BFRF1_3'_UTR_	381	451	AAGCCCACCCUCCAGGGGAGGCUGGAGGCGGAUUUUCCAGACAGUCCCCUGCUUCCUAAAUUUCAAGAGC	hsa-miR-6124_MIMAT0024597_Homo_sapiens_miR-6124	GGGAAAAGGAAGGGGGAGGA	UCCCCUGCUUCCUAAAUUUC&GGAAAAGGAAGGGGGAGGA	....................&...................	45,64	3,21	-11.33	-19.86	8.54	0
		BFRF1_3'_UTR_	203	273	UUAACUUUGCGGACAGAGGCCAGAGCCGUUUGCUCCAUCUGUCAGCAACGCCAAGCUCCAGAGGACGCCC	hsa-miR-6514-5p_MIMAT0025484_Homo_sapiens_miR-6514-5p	UAUGGAGUGGACUUUCAGCUGGC	GCCAAGCUCCAGAGGACGCCC&GGAGUGGACUUUCAGCUGGC	(((.((((..((((..(((((&)).)))..)))).)))))))	50,70	5,24	-14.76	-19.82	3.38	1.68
		BFRF1_3'_UTR_	159	229	GGCCGGUGGUCCUGCGGGGGGUGACGGUCAGGCAGCUCCUGUAUUUAACUUUGCGGACAGAGGCCAGAGC	hsa-miR-558_MIMAT0003222_Homo_sapiens_miR-558	UGAGCUGCUGUACCAAAAU	GGUCAGGCAGCUC&GAGCUGCUGUACC	(((..((((((((&))))))))..)))	26,38	3,15	-12.31	-19.75	7.1	0.35
		BFRF1_3'_UTR_	258	328	CUCCAGAGGACGCCCGCGACGAGCCUCACCUGUUCUCCUCCUGUUUAGAGGUAGAAUUGCCACCUGGUGA	hsa-miR-4516_MIMAT0019053_Homo_sapiens_miR-4516	GGGAGAAGGGUCGGGGC	GCCCGCGACGAGCCUCACC&GGGAGAAGGGUCGGGGC	((((.((((....(((.((&)))))....))))))))	12,30	2,18	-14.14	-19.75	5.22	0.39
		BFRF1_3'_UTR_	487	557	AGGCUCAAAGAAGUUACCUGGUAUUUCUGACAUCCCAGUUCUGCUACGAAGAGUACGUGCAGAGGACUUU	hsa-miR-4646-5p_MIMAT0019707_Homo_sapiens_miR-4646-5p	ACUGGGAAGAGGAGCUGAGGGA	CCUGGUAUUUCUGACAUCCCAGU&ACUGGGAAGAGGAGCUGAGG	((((((.(((((....(((((((&)))))))))))).))).)))	17,39	2,21	-11.48	-19.75	5.91	2.36
		BFRF1_3'_UTR_	10	80	GAGGCUGGCUGAGCCACCGAGCGCCCGCUCGGGCUGGCGGCCCCGAAUCCGGGCAGUGCUGCCGCACAAC	hsa-miR-3194-5p_MIMAT0015078_Homo_sapiens_miR-3194-5p	GGCCAGCCACCAGGAGGGCUG	GGCUGGCUGAGCC&GGCCAGCCACC	.............&...........	3,15	2,12	-4.85	-19.71	6.13	8.72
		BFRF1_3'_UTR_	565	606	CUCGGCGCCAACGCGCCAUAGACAAGAGGCAGAGAGCCAGU	hsa-miR-6822-3p_MIMAT0027545_Homo_sapiens_miR-6822-3p	AGGCUCUAACUGGCUUUCCCUGCA	GCAGAGAGCCAGU&ACUGGCUUUCCCUGC	(((((((((((((&))))))))))..)))	29,41	10,24	-12.54	-19.71	3.83	3.34
		BFRF1_3'_UTR_	391	461	UCCAGGGGAGGCUGGAGGCGGAUUUUCCAGACAGUCCCCUGCUUCCUAAAUUUCAAGAGCUGAACCAGAA	hsa-miR-3199_MIMAT0015084_Homo_sapiens_miR-3199	AGGGACUGCCUUAGGAGAAAGUU	UUUUCCAGACAGUCCC&GGGACUGCCUUAGGAGAA	.(((((((.(((((((&))))))).))..))))).	23,38	3,20	-10.83	-19.59	6.03	2.73
		BFRF1_3'_UTR_	241	311	CUGUCAGCAACGCCAAGCUCCAGAGGACGCCCGCGACGAGCCUCACCUGUUCUCCUCCUGUUUAGAGGUA	hsa-miR-1181_MIMAT0005826_Homo_sapiens_miR-1181	CCGUCGCCGCCACCCGAGCCG	GCUCCAGAGGACGCCCGCGACG&CGUCGCCGCCACCCGAGC	((((..(.((.((...((((((&)))))))))).)..))))	17,38	3,20	-9.63	-19.54	8.07	1.85
		BFRF1_3'_UTR_	343	413	CCGUCUCUAUCAGACGCGUUAUGGCACGCCGGCUGCCCAAGCCCACCCUCCAGGGGAGGCUGGAGGCGGA	hsa-miR-6721-5p_MIMAT0025852_Homo_sapiens_miR-6721-5p	UGGGCAGGGGCUUAUUGUAGGAG	GCCGGCUGCCCA&UGGGCAGGGGC	(((..(((((((&))))))).)))	28,39	2,12	-11.58	-19.5	4.8	3.13
		BFRF1_3'_UTR_	247	317	GCAACGCCAAGCUCCAGAGGACGCCCGCGACGAGCCUCACCUGUUCUCCUCCUGUUUAGAGGUAGAAUUG	hsa-miR-485-5p_MIMAT0002175_Homo_sapiens_miR-485-5p	AGAGGCUGGCCGUGAUGAAUUC	CGCGACGAGCCUC&GAGGCUGGCCGUG	((((.(.((((((&)))))).).))))	26,38	3,15	-14.12	-19.42	4.6	0.7
		BFRF1_3'_UTR_	93	163	UCGACCGUGGCUCCCGCCUCUUGGAUGCCAUCAUCCCCUGCUUGGGACCCGACCGCACUUGCAUGCGGCC	hsa-miR-4450_MIMAT0018971_Homo_sapiens_miR-4450	UGGGGAUUUGGAGAAGUGGUGA	GCCUCUUGGAUGCCAUCAUCCCC&GGGGAUUUGGAGAAGUGGU	(((.(((.....(((..((((((&)))))).)))..))).)))	16,38	3,21	-10.55	-19.41	8.57	0.28
		BFRF1_3'_UTR_	161	231	CCGGUGGUCCUGCGGGGGGUGACGGUCAGGCAGCUCCUGUAUUUAACUUUGCGGACAGAGGCCAGAGCCG	hsa-miR-3139_MIMAT0015007_Homo_sapiens_miR-3139	UAGGAGCUCAACAGAUGCCUGUU	CAGGCAGCUCCUG&UAGGAGCUCAACAGAUGCCUG	(((((((((((((&))))))))........)))))	27,39	2,22	-8.7	-19.24	7.02	3.51
		BFRF1_3'_UTR_	299	369	UGUUUAGAGGUAGAAUUGCCACCUGGUGAGCGGUGUGCGGGCUGCCGUCUCUAUCAGACGCGUUAUGGCA	hsa-miR-8064_MIMAT0030991_Homo_sapiens_miR-8064	AGCACACUGAGCGAGCGGAC	CUGGUGAGCGGUGUGC&GCACACUGAGCGAGCGG	(((.((..((((((((&))))))))..).).)))	23,38	3,19	-7.84	-19.23	10.09	1.3
		BFRF1_3'_UTR_	40	110	GGGCUGGCGGCCCCGAAUCCGGGCAGUGCUGCCGCACAACGCGGCCUACGAGCUCGACCGUGGCUCCCGC	hsa-miR-210-3p_MIMAT0000267_Homo_sapiens_miR-210-3p	CUGUGCGUGUGACAGCGGCUGA	CAGUGCUGCCGCACA&UGUGCGUGUGACAGCGGCUG	...............&....................	24,38	3,22	-5.93	-19.21	9.8	3.48
		BFRF1_3'_UTR_	557	606	UGGGGUGCCUCGGCGCCAACGCGCCAUAGACAAGAGGCAGAGAGCCAGU	hsa-miR-6781-3p_MIMAT0027463_Homo_sapiens_miR-6781-3p	UGCCUCUUUUCCACGGCCUCAG	GCCAUAGACAAGAGGCA&UGCCUCUUUUCCACGGC	(((...((.((((((((&)))))))).))...)))	23,39	2,18	-6.88	-19.2	9.88	2.44
		BFRF1_3'_UTR_	387	457	ACCCUCCAGGGGAGGCUGGAGGCGGAUUUUCCAGACAGUCCCCUGCUUCCUAAAUUUCAAGAGCUGAACC	hsa-miR-3120-5p_MIMAT0019198_Homo_sapiens_miR-3120-5p	CCUGUCUGUGCCUGCUGUACA	GCUGGAGGCGGAUUUUCCAGACAG&CUGUCUGUGCCUGCUGU	((.(.(((((.......(((((((&)))))))))))).).))	15,38	3,19	-5.87	-19.18	10.45	2.87
		BFRF1_3'_UTR_	524	594	GUUCUGCUACGAAGAGUACGUGCAGAGGACUUUUGGGGUGCCUCGGCGCCAACGCGCCAUAGACAAGAGG	hsa-miR-6793-3p_MIMAT0027487_Homo_sapiens_miR-6793-3p	UCCCCAACCCCUGCCCGCAG	CGUGCAGAGGACUUUUGGGG&CCCCAACCCCUGCCCG	((.((((.((....((((((&)))))))).)))).))	19,38	3,18	-9.52	-19.18	9.2	0.46
		BFRF1_3'_UTR_	471	541	AAUGAUGUUUUUCGGGAGGCUCAAAGAAGUUACCUGGUAUUUCUGACAUCCCAGUUCUGCUACGAAGAGU	hsa-miR-1911-3p_MIMAT0007886_Homo_sapiens_miR-1911-3p	CACCAGGCAUUGUGGUCUCC	GGAGGCUCAAAGAAGUUACCUGGU&ACCAGGCAUUGUGGUCUCC	((((((((((.(......((((((&))))))).))).)))))))	15,38	3,21	-7.05	-19.17	8.77	3.35
		BFRF1_3'_UTR_	384	454	CCCACCCUCCAGGGGAGGCUGGAGGCGGAUUUUCCAGACAGUCCCCUGCUUCCUAAAUUUCAAGAGCUGA	hsa-miR-5706_MIMAT0022500_Homo_sapiens_miR-5706	UUCUGGAUAACAUGCUGAAGCU	GGCUGGAGGCGGAUUUUCCAGA&UCUGGAUAACAUGCUGAAGCU	((((...((((.....((((((&)))))).....))))..))))	17,38	3,23	-7.42	-19.12	10.66	1.04
		BFRF1_3'_UTR_	386	456	CACCCUCCAGGGGAGGCUGGAGGCGGAUUUUCCAGACAGUCCCCUGCUUCCUAAAUUUCAAGAGCUGAAC	hsa-miR-632_MIMAT0003302_Homo_sapiens_miR-632	GUGUCUGCUUCCUGUGGGA	UCCAGGGGAGGC&GCUUCCUGUGGG	.(((.(((((((&))))))).))).	6,17	8,19	-7.17	-19.11	9.06	2.88
		BFRF1_3'_UTR_	17	87	GCUGAGCCACCGAGCGCCCGCUCGGGCUGGCGGCCCCGAAUCCGGGCAGUGCUGCCGCACAACGCGGCCU	hsa-miR-4508_MIMAT0019045_Homo_sapiens_miR-4508	GCGGGGCUGGGCGCGCG	GCUGAGCCACCG&CGGGGCUGGGC	(((.((((.(((&))))))).)))	1,12	3,13	-8.14	-19.11	4.7	6.26
		BFRF1_3'_UTR_	223	293	CAGAGCCGUUUGCUCCAUCUGUCAGCAACGCCAAGCUCCAGAGGACGCCCGCGACGAGCCUCACCUGUUC	hsa-miR-27b-5p_MIMAT0004588_Homo_sapiens_miR-27b-5p	AGAGCUUAGCUGAUUGGUGAAC	CAUCUGUCAGCAACGCCAAGCUC&GAGCUUAGCUGAUUGGUG	((((.((((((......((((((&)))))).)))))).))))	16,38	3,20	-10.79	-19.1	6.9	1.41
		BFRF1_3'_UTR_	256	326	AGCUCCAGAGGACGCCCGCGACGAGCCUCACCUGUUCUCCUCCUGUUUAGAGGUAGAAUUGCCACCUGGU	hsa-miR-4773_MIMAT0019928_Homo_sapiens_miR-4773	CAGAACAGGAGCAUAGAAAGGC	CCUGUUCUCCUCCUGUUU&GAACAGGAGCAUAGAAAGG	(((.((((.(((((((((&)))))))))...)))))))	31,48	4,22	-13.57	-19.05	5.21	0.27
		BFRF1_3'_UTR_	546	606	CAGAGGACUUUUGGGGUGCCUCGGCGCCAACGCGCCAUAGACAAGAGGCAGAGAGCCAGU	hsa-miR-652-3p_MIMAT0003322_Homo_sapiens_miR-652-3p	AAUGGCGCCACUAGGGUUGUG	AGGACUUUUGGGGUGCC&GGCGCCACUAGGGUUGU	.................&.................	4,20	5,21	-6.92	-19.03	8.37	3.75
		BFRF1_3'_UTR_	101	171	GGCUCCCGCCUCUUGGAUGCCAUCAUCCCCUGCUUGGGACCCGACCGCACUUGCAUGCGGCCGGUGGUCC	hsa-miR-6814-5p_MIMAT0027528_Homo_sapiens_miR-6814-5p	UCCCAAGGGUGAGAUGCUGCCA	GGCUCCCGCCUCUUGG&CCAAGGGUGAGAUGCUGCC	................&...................	1,16	4,22	-8.86	-19.02	7.5	2.66
		BFRF1_3'_UTR_	35	105	CGCUCGGGCUGGCGGCCCCGAAUCCGGGCAGUGCUGCCGCACAACGCGGCCUACGAGCUCGACCGUGGCU	hsa-miR-885-3p_MIMAT0004948_Homo_sapiens_miR-885-3p	AGGCAGCGGGGUGUAGUGGAUA	GCACAACGCGGCCU&AGGCAGCGGGGUGU	((((..(((.((((&)))).)))..))))	39,52	2,15	-12.13	-19.01	5.55	1.33
		BFRF1_3'_UTR_	210	280	UGCGGACAGAGGCCAGAGCCGUUUGCUCCAUCUGUCAGCAACGCCAAGCUCCAGAGGACGCCCGCGACGA	hsa-miR-3660_MIMAT0018081_Homo_sapiens_miR-3660	ACUGACAGGAGAGCAUUUUGA	UGCUCCAUCUGUCAG&CUGACAGGAGAGCA	(((((..((((((((&)))))))).)))))	24,38	3,16	-7.92	-18.99	9.76	1.31
		BFRF1_3'_UTR_	392	462	CCAGGGGAGGCUGGAGGCGGAUUUUCCAGACAGUCCCCUGCUUCCUAAAUUUCAAGAGCUGAACCAGAAU	hsa-miR-3191-3p_MIMAT0015075_Homo_sapiens_miR-3191-3p	UGGGGACGUAGCUGGCCAGACAG	CCAGACAGUCCCC&GGGGACGUAGCUGG	((((...((((((&))))))....))))	26,38	3,16	-7.43	-18.83	9.1	2.31
		BFRF1_3'_UTR_	516	586	ACAUCCCAGUUCUGCUACGAAGAGUACGUGCAGAGGACUUUUGGGGUGCCUCGGCGCCAACGCGCCAUAG	hsa-miR-6852-3p_MIMAT0027605_Homo_sapiens_miR-6852-3p	UGUCCUCUGUUCCUCAG	GAGUACGUGCAGAGGAC&GUCCUCUGUUCCUC	(((...(.(((((((((&))))))))).))))	22,38	3,16	-7.75	-18.74	10.42	0.57
		BFRF1_3'_UTR_	5	75	UGCCAGAGGCUGGCUGAGCCACCGAGCGCCCGCUCGGGCUGGCGGCCCCGAAUCCGGGCAGUGCUGCCGC	hsa-miR-4740-3p_MIMAT0019870_Homo_sapiens_miR-4740-3p	GCCCGAGAGGAUCCGUCCCUGC	CCGCUCGGGC&GCCCGAGAGG	((.(((((((&))))))).))	30,39	2,11	-4.71	-18.71	10.91	3.08
		BFRF1_3'_UTR_	455	525	CCAGAAUAAUCUCCCCAAUGAUGUUUUUCGGGAGGCUCAAAGAAGUUACCUGGUAUUUCUGACAUCCCAG	hsa-miR-6823-3p_MIMAT0027547_Homo_sapiens_miR-6823-3p	UGAGCCUCUCCUUCCCUCCAG	GGGAGGCUCA&UGAGCCUCUC	((((((((((&))))))))))	30,39	2,11	-11.3	-18.7	6.82	0.59
		BFRF1_3'_UTR_	392	462	CCAGGGGAGGCUGGAGGCGGAUUUUCCAGACAGUCCCCUGCUUCCUAAAUUUCAAGAGCUGAACCAGAAU	hsa-miR-4652-5p_MIMAT0019716_Homo_sapiens_miR-4652-5p	AGGGGACUGGUUAAUAGAACUA	CAGUCCCCU&AGGGGACUG	(((((((((&)))))))))	31,39	2,10	-8.52	-18.6	8.24	1.84
		BFRF1_3'_UTR_	97	167	CCGUGGCUCCCGCCUCUUGGAUGCCAUCAUCCCCUGCUUGGGACCCGACCGCACUUGCAUGCGGCCGGUG	hsa-miR-6165_MIMAT0024782_Homo_sapiens_miR-6165	CAGCAGGAGGUGAGGGGAG	UCCCGCCUCUUG&CAGGAGGUGAGGG	.(((((((((((&))))))))).)).	8,19	5,17	-13.19	-18.6	4.52	0.9
		BFRF1_3'_UTR_	513	583	CUGACAUCCCAGUUCUGCUACGAAGAGUACGUGCAGAGGACUUUUGGGGUGCCUCGGCGCCAACGCGCCA	hsa-miR-6728-3p_MIMAT0027358_Homo_sapiens_miR-6728-3p	UCUCUGCUCUGCUCUCCCCAG	CUGCUACGAAGAGUACGUGCAGAG&CUCUGCUCUGCUCUCCCCAG	........................&....................	15,38	3,22	-7.76	-18.55	10.5	0.3
		BFRF1_3'_UTR_	91	161	GCUCGACCGUGGCUCCCGCCUCUUGGAUGCCAUCAUCCCCUGCUUGGGACCCGACCGCACUUGCAUGCGG	hsa-miR-6744-5p_MIMAT0027389_Homo_sapiens_miR-6744-5p	UGGAUGACAGUGGAGGCCU	GCCUCUUGGAUGCCAUCAUCC&GGAUGACAGUGGAGGC	((((((.....((..((((((&))))))..))))))))	18,38	3,18	-9.4	-18.54	8.48	0.67
		BFRF1_3'_UTR_	400	470	GGCUGGAGGCGGAUUUUCCAGACAGUCCCCUGCUUCCUAAAUUUCAAGAGCUGAACCAGAAUAAUCUCCC	hsa-miR-4476_MIMAT0019003_Homo_sapiens_miR-4476	CAGGAAGGAUUUAGGGACAGGC	CCUGCUUCCUAAAUUUCAAGAGCUG&CAGGAAGGAUUUAGGGACAGG	((((.(((((((((((......(((&)))...)))))))))))))))	29,53	2,22	-11.73	-18.52	6.71	0.08
		BFRF1_3'_UTR_	262	332	AGAGGACGCCCGCGACGAGCCUCACCUGUUCUCCUCCUGUUUAGAGGUAGAAUUGCCACCUGGUGAGCGG	hsa-miR-4779_MIMAT0019938_Homo_sapiens_miR-4779	UAGGAGGGAAUAGUAAAAGCAG	CUGUUCUCCUCCUG&UAGGAGGGAAUAG	((((((.(((((((&)))))))))))))	26,39	2,14	-12.41	-18.52	5.98	0.13
		BFRF1_3'_UTR_	222	292	CCAGAGCCGUUUGCUCCAUCUGUCAGCAACGCCAAGCUCCAGAGGACGCCCGCGACGAGCCUCACCUGUU	hsa-miR-4453_MIMAT0018975_Homo_sapiens_miR-4453	GAGCUUGGUCUGUAGCGGUU	GCAACGCCAAGCUC&GAGCUUGGUCUGUAGC	((.(((((((((((&)))))))))..)).))	26,39	2,17	-11.22	-18.29	4.67	2.39
		BFRF1_3'_UTR_	258	328	CUCCAGAGGACGCCCGCGACGAGCCUCACCUGUUCUCCUCCUGUUUAGAGGUAGAAUUGCCACCUGGUGA	hsa-miR-5703_MIMAT0022496_Homo_sapiens_miR-5703	AGGAGAAGUCGGGAAGGU	GCCUCACCUGUUCUCCU&AGGAGAAGUCGGGAAGGU	((((..((..(((((((&)))))))...))..))))	23,39	2,19	-8.8	-18.27	9.17	0.31
		BFRF1_3'_UTR_	568	606	GGCGCCAACGCGCCAUAGACAAGAGGCAGAGAGCCAGU	hsa-miR-892b_MIMAT0004918_Homo_sapiens_miR-892b	CACUGGCUCCUUUCUGGGUAGA	ACAAGAGGCAGAGAGCCAGU&ACUGGCUCCUUUCUGGGU	....................&..................	19,38	3,20	-10.54	-18.25	4.06	3.64
		BFRF1_3'_UTR_	17	87	GCUGAGCCACCGAGCGCCCGCUCGGGCUGGCGGCCCCGAAUCCGGGCAGUGCUGCCGCACAACGCGGCCU	hsa-miR-6775-5p_MIMAT0027450_Homo_sapiens_miR-6775-5p	UCGGGGCAUGGGGGAGGGAGGCUGG	GGCCCCGAAUCCGGGCAGUGCU&GGCAUGGGGGAGGGAGGCU	((((((...(((.....(((((&)))))...))).)).))))	32,53	6,24	-8.23	-18.24	8.11	1.89
		BFRF1_3'_UTR_	159	229	GGCCGGUGGUCCUGCGGGGGGUGACGGUCAGGCAGCUCCUGUAUUUAACUUUGCGGACAGAGGCCAGAGC	hsa-miR-4487_MIMAT0019021_Homo_sapiens_miR-4487	AGAGCUGGCUGAAGGGCAG	UCAGGCAGCUC&GAGCUGGCUGA	((((.((((((&)))))).))))	28,38	3,13	-10.07	-18.2	4.61	3.52
		BFRF1_3'_UTR_	252	322	GCCAAGCUCCAGAGGACGCCCGCGACGAGCCUCACCUGUUCUCCUCCUGUUUAGAGGUAGAAUUGCCACC	hsa-miR-764_MIMAT0010367_Homo_sapiens_miR-764	GCAGGUGCUCACUUGUCCUCCU	GACGAGCCUCACCUGU&GCAGGUGCUCACUUGUC	((((((...(((((((&)))))))....))))))	24,39	2,18	-8.74	-18.01	4.84	4.44
		BFRF1_3'_UTR_	372	442	CGGCUGCCCAAGCCCACCCUCCAGGGGAGGCUGGAGGCGGAUUUUCCAGACAGUCCCCUGCUUCCUAAAU	hsa-miR-6791-3p_MIMAT0027483_Homo_sapiens_miR-6791-3p	UGCCUCCUUGGUCUCCGGCAG	CCCUCCAGGGGAGGC&GCCUCCUUGGUCUCCGG	...............&.................	17,31	3,19	-4.83	-17.95	8.99	4.14
		BFRF1_3'_UTR_	390	460	CUCCAGGGGAGGCUGGAGGCGGAUUUUCCAGACAGUCCCCUGCUUCCUAAAUUUCAAGAGCUGAACCAGA	hsa-miR-1288-3p_MIMAT0005942_Homo_sapiens_miR-1288-3p	UGGACUGCCCUGAUCUGGAGA	UUUCCAGACAGUCC&GGACUGCCCUGAUCUGGAGA	((((((((((((((&))))))......))))))))	25,38	3,22	-10.1	-17.82	5.73	1.99
		BFRF1_3'_UTR_	16	86	GGCUGAGCCACCGAGCGCCCGCUCGGGCUGGCGGCCCCGAAUCCGGGCAGUGCUGCCGCACAACGCGGCC	hsa-miR-128-2-5p_MIMAT0031095_Homo_sapiens_miR-128-2-5p	GGGGGCCGAUACACUGUACGAGA	CGGCCCC&GGGGCCG	(((((((&)))))))	32,38	3,9	-8.63	-17.8	8.17	1.01
		BFRF1_3'_UTR_	225	295	GAGCCGUUUGCUCCAUCUGUCAGCAACGCCAAGCUCCAGAGGACGCCCGCGACGAGCCUCACCUGUUCUC	hsa-miR-6874-5p_MIMAT0027648_Homo_sapiens_miR-6874-5p	AUGGAGCUGGAACCAGAUCAGGC	UCUGUCAGCAACGCCAAGCUCCA&UGGAGCUGGAACCAGAUCAGG	.(((((.......((.(((((((&))))))))).....)).))).	16,38	3,23	-7.29	-17.74	7.29	3.17
		BFRF1_3'_UTR_	133	203	CUUGGGACCCGACCGCACUUGCAUGCGGCCGGUGGUCCUGCGGGGGGUGACGGUCAGGCAGCUCCUGUAU	hsa-miR-3619-3p_MIMAT0019219_Homo_sapiens_miR-3619-3p	GGGACCAUCCUGCCUGCUGUGG	ACGGUCAGGCAG&CUGCCUGCUGU	((((.(((((((&)))))))))))	50,61	11,21	-9.82	-17.73	5.07	2.84
		BFRF1_3'_UTR_	145	215	CCGCACUUGCAUGCGGCCGGUGGUCCUGCGGGGGGUGACGGUCAGGCAGCUCCUGUAUUUAACUUUGCGG	hsa-miR-6802-3p_MIMAT0027505_Homo_sapiens_miR-6802-3p	UUCACCCCUCUCACCUAAGCAG	GGGGGGUGA&UCACCCCUC	(((((((((&)))))))))	30,38	3,11	-12.02	-17.7	5.63	0.05
		BFRF1_3'_UTR_	516	586	ACAUCCCAGUUCUGCUACGAAGAGUACGUGCAGAGGACUUUUGGGGUGCCUCGGCGCCAACGCGCCAUAG	hsa-miR-3909_MIMAT0018183_Homo_sapiens_miR-3909	UGUCCUCUAGGGCCUGCAGUCU	GUACGUGCAGAGGAC&GUCCUCUAGGGCCUGC	(((.((.((((((((&))))))).).)).)))	24,38	3,18	-3.83	-17.65	10.25	3.56
		BFRF1_3'_UTR_	346	416	UCUCUAUCAGACGCGUUAUGGCACGCCGGCUGCCCAAGCCCACCCUCCAGGGGAGGCUGGAGGCGGAUUU	hsa-miR-635_MIMAT0003305_Homo_sapiens_miR-635	ACUUGGGCACUGAAACAAUGUCC	CGGCUGCCCAAG&CUUGGGCACUG	(((.((((((((&)))))))))))	27,38	3,13	-6.31	-17.61	6.87	4.43
		BFRF1_3'_UTR_	289	359	GUUCUCCUCCUGUUUAGAGGUAGAAUUGCCACCUGGUGAGCGGUGUGCGGGCUGCCGUCUCUAUCAGACG	hsa-miR-4733-3p_MIMAT0019858_Homo_sapiens_miR-4733-3p	CCACCAGGUCUAGCAUUGGGAU	UGCCACCUGGUG&CACCAGGUCUAGCA	(((.((((((((&))))))))...)))	27,38	3,16	-9.02	-17.52	4.86	3.63
		BFRF1_3'_UTR_	453	523	AACCAGAAUAAUCUCCCCAAUGAUGUUUUUCGGGAGGCUCAAAGAAGUUACCUGGUAUUUCUGACAUCCC	hsa-miR-6829-3p_MIMAT0027559_Homo_sapiens_miR-6829-3p	UGCCUCCUCCGUGGCCUCAG	UGAUGUUUUUCGGGAGGC&GCCUCCUCCGUGGCCUCA	(((.(((....(((((((&)))))))....))).)))	21,38	3,20	-4.32	-17.45	8.9	4.22
		BFRF1_3'_UTR_	565	606	CUCGGCGCCAACGCGCCAUAGACAAGAGGCAGAGAGCCAGU	hsa-miR-760_MIMAT0004957_Homo_sapiens_miR-760	CGGCUCUGGGUCUGUGGGGA	CAAGAGGCAGAGAGCC&GGCUCUGGGUCUGUGG	................&................	23,38	3,18	-10.46	-17.38	4.07	2.85
		BFRF1_3'_UTR_	391	461	UCCAGGGGAGGCUGGAGGCGGAUUUUCCAGACAGUCCCCUGCUUCCUAAAUUUCAAGAGCUGAACCAGAA	hsa-miR-365a-5p_MIMAT0009199_Homo_sapiens_miR-365a-5p	AGGGACUUUUGGGGGCAGAUGUG	UUUCCAGACAGUCCC&GGGACUUUUGGGGG	.(((((((.((((((&))))))))))))).	24,38	3,16	-8.53	-17.36	6.03	2.8
		BFRF1_3'_UTR_	511	581	UUCUGACAUCCCAGUUCUGCUACGAAGAGUACGUGCAGAGGACUUUUGGGGUGCCUCGGCGCCAACGCGC	hsa-miR-4793-3p_MIMAT0019966_Homo_sapiens_miR-4793-3p	UCUGCACUGUGAGUUGGCUGGCU	GCUACGAAGAGUACGUGCAG&CUGCACUGUGAGUUGGCUGGC	((((.(..((.(((((((((&)))))).)))..))..)))))	19,38	3,23	-8.23	-17.33	6.44	2.67
		BFRF1_3'_UTR_	146	216	CGCACUUGCAUGCGGCCGGUGGUCCUGCGGGGGGUGACGGUCAGGCAGCUCCUGUAUUUAACUUUGCGGA	hsa-miR-6879-3p_MIMAT0027659_Homo_sapiens_miR-6879-3p	UGUCACCCGCUCCUUGCCCAG	GGGGGGUGAC&GUCACCCGCU	((.(((((((&))))))).))	29,38	3,12	-10.27	-17.3	5.98	1.06
		BFRF1_3'_UTR_	253	323	CCAAGCUCCAGAGGACGCCCGCGACGAGCCUCACCUGUUCUCCUCCUGUUUAGAGGUAGAAUUGCCACCU	hsa-miR-552-3p_MIMAT0003215_Homo_sapiens_miR-552-3p	AACAGGUGACUGGUUAGACAA	GACGAGCCUCACCUGUU&AACAGGUGACUGGUU	(((.((..(((((((((&))))))))))).)))	23,39	2,16	-8.03	-17.28	6.44	2.8
		BFRF1_3'_UTR_	0	70	UGGGCUGCCAGAGGCUGGCUGAGCCACCGAGCGCCCGCUCGGGCUGGCGGCCCCGAAUCCGGGCAGUGCU	hsa-miR-6787-3p_MIMAT0027475_Homo_sapiens_miR-6787-3p	UCUCAGCUGCUGCCCUCUCCAG	GGGCAGUGCU&AGCUGCUGCCC	((((((((((&))).)))))))	61,70	6,16	-14.89	-17.25	1.22	1.14
		BFRF1_3'_UTR_	34	104	CCGCUCGGGCUGGCGGCCCCGAAUCCGGGCAGUGCUGCCGCACAACGCGGCCUACGAGCUCGACCGUGGC	hsa-miR-103a-3p_MIMAT0000101_Homo_sapiens_miR-103a-3p	AGCAGCAUUGUACAGGGCUAUGA	GCAGUGCUGC&GCAGCAUUGU	((((((((((&))))))))))	29,38	3,12	-8.99	-17.2	6.47	1.75
		BFRF1_3'_UTR_	34	104	CCGCUCGGGCUGGCGGCCCCGAAUCCGGGCAGUGCUGCCGCACAACGCGGCCUACGAGCUCGACCGUGGC	hsa-miR-107_MIMAT0000104_Homo_sapiens_miR-107	AGCAGCAUUGUACAGGGCUAUCA	GCAGUGCUGC&GCAGCAUUGU	((((((((((&))))))))))	29,38	3,12	-9.09	-17.2	6.47	1.64
		BFRF1_3'_UTR_	370	440	GCCGGCUGCCCAAGCCCACCCUCCAGGGGAGGCUGGAGGCGGAUUUUCCAGACAGUCCCCUGCUUCCUAA	hsa-miR-766-3p_MIMAT0003888_Homo_sapiens_miR-766-3p	ACUCCAGCCCCACAGCCUCAGC	GGCUGGAG&CUCCAGCC	((((((((&))))))))	31,38	3,10	-7.71	-17.2	8.97	0.52
		BFRF1_3'_UTR_	487	557	AGGCUCAAAGAAGUUACCUGGUAUUUCUGACAUCCCAGUUCUGCUACGAAGAGUACGUGCAGAGGACUUU	hsa-miR-3192-5p_MIMAT0015076_Homo_sapiens_miR-3192-5p	UCUGGGAGGUUGUAGCAGUGGAA	CCUGGUAUUUCUGACAUCCCAG&CUGGGAGGUUGUAGCAGUG	......................&...................	17,38	3,21	-10.95	-17.14	5.06	1.12
		BFRF1_3'_UTR_	485	555	GGAGGCUCAAAGAAGUUACCUGGUAUUUCUGACAUCCCAGUUCUGCUACGAAGAGUACGUGCAGAGGACU	hsa-miR-5187-5p_MIMAT0021117_Homo_sapiens_miR-5187-5p	UGGGAUGAGGGAUUGAAGUGGA	CCUGGUAUUUCUGACAUCCCA&UGGGAUGAGGGAUUGAAGUGG	((...((.((((..(((((((&))))))).)))).))....))	19,39	2,22	-10.4	-17.1	6.59	0.1
		BFRF1_3'_UTR_	399	469	AGGCUGGAGGCGGAUUUUCCAGACAGUCCCCUGCUUCCUAAAUUUCAAGAGCUGAACCAGAAUAAUCUCC	hsa-miR-6828-5p_MIMAT0027556_Homo_sapiens_miR-6828-5p	AGGAAGCAAGAGAACCCUGUGG	ACAGUCCCCUGCUUCCU&AGGAAGCAAGAGAACCCUGU	((((((.(.((((((((&)))))))).).))...))))	23,39	2,21	-8.83	-17.09	6.95	1.31
		BFRF1_3'_UTR_	89	159	GAGCUCGACCGUGGCUCCCGCCUCUUGGAUGCCAUCAUCCCCUGCUUGGGACCCGACCGCACUUGCAUGC	hsa-miR-1272_MIMAT0005925_Homo_sapiens_miR-1272	GAUGAUGAUGGCAGCAAAUUCUGAAA	UGCCAUCAUC&GAUGAUGGCA	((((((((((&))))))))))	30,39	5,14	-10.71	-17	5.21	1.09
		BFRF1_3'_UTR_	360	430	GUUAUGGCACGCCGGCUGCCCAAGCCCACCCUCCAGGGGAGGCUGGAGGCGGAUUUUCCAGACAGUCCCC	hsa-miR-4308_MIMAT0016861_Homo_sapiens_miR-4308	UCCCUGGAGUUUCUUCUU	CUCCAGGG&CCCUGGAG	((((((((&))))))))	31,38	3,10	-7.7	-17	8.13	1.17
		BFRF1_3'_UTR_	365	435	GGCACGCCGGCUGCCCAAGCCCACCCUCCAGGGGAGGCUGGAGGCGGAUUUUCCAGACAGUCCCCUGCUU	hsa-miR-6778-3p_MIMAT0027457_Homo_sapiens_miR-6778-3p	UGCCUCCCUGACAUUCCACAG	GGGGAGGC&GCCUCCCU	((((((((&))))))))	31,38	3,10	-9.18	-17	7.28	0.54
		BFRF1_3'_UTR_	372	442	CGGCUGCCCAAGCCCACCCUCCAGGGGAGGCUGGAGGCGGAUUUUCCAGACAGUCCCCUGCUUCCUAAAU	hsa-miR-6778-3p_MIMAT0027457_Homo_sapiens_miR-6778-3p	UGCCUCCCUGACAUUCCACAG	GGGGAGGC&GCCUCCCU	((((((((&))))))))	24,31	3,10	-8.6	-17	7.86	0.54
		BFRF1_3'_UTR_	17	87	GCUGAGCCACCGAGCGCCCGCUCGGGCUGGCGGCCCCGAAUCCGGGCAGUGCUGCCGCACAACGCGGCCU	hsa-miR-5090_MIMAT0021082_Homo_sapiens_miR-5090	CCGGGGCAGAUUGGUGUAGGGUG	CACCGAGCGCCC&GGGCAGAUUGGUG	((((((..((((&))))...))))))	8,19	5,17	-6.81	-16.91	7.19	2.91
		BFRF1_3'_UTR_	83	153	GCCUACGAGCUCGACCGUGGCUCCCGCCUCUUGGAUGCCAUCAUCCCCUGCUUGGGACCCGACCGCACUU	hsa-miR-324-5p_MIMAT0000761_Homo_sapiens_miR-324-5p	CGCAUCCCCUAGGGCAUUGGUGU	CCCGCCUCUUGGAUGC&GCAUCCCCUAGGGCAUUGG	................&...................	23,38	3,21	-5.6	-16.84	7.26	3.97
		BFRF1_3'_UTR_	391	461	UCCAGGGGAGGCUGGAGGCGGAUUUUCCAGACAGUCCCCUGCUUCCUAAAUUUCAAGAGCUGAACCAGAA	hsa-miR-8052_MIMAT0030979_Homo_sapiens_miR-8052	CGGGACUGUAGAGGGCAUGAGC	UCCAGACAGUCCC&GGGACUGUAGAGGG	.((..((((((((&))))))))...)).	26,38	3,16	-9.54	-16.83	6.03	1.26
		BFRF1_3'_UTR_	50	120	CCCCGAAUCCGGGCAGUGCUGCCGCACAACGCGGCCUACGAGCUCGACCGUGGCUCCCGCCUCUUGGAUG	hsa-miR-1295a_MIMAT0005885_Homo_sapiens_miR-1295a	UUAGGCCGCAGAUCUGGGUGA	GCGGCCUA&UAGGCCGC	((((((((&))))))))	31,38	3,10	-7.24	-16.8	6.53	3.03
		BFRF1_3'_UTR_	15	85	UGGCUGAGCCACCGAGCGCCCGCUCGGGCUGGCGGCCCCGAAUCCGGGCAGUGCUGCCGCACAACGCGGC	hsa-miR-6877-5p_MIMAT0027654_Homo_sapiens_miR-6877-5p	AGGGCCGAAGGGUGGAAGCUGC	CUGGCGGCCC&GGGCCGAAGG	((..((((((&))))))..))	29,38	3,12	-7.07	-16.7	6.79	2.84
		BFRF1_3'_UTR_	247	317	GCAACGCCAAGCUCCAGAGGACGCCCGCGACGAGCCUCACCUGUUCUCCUCCUGUUUAGAGGUAGAAUUG	hsa-miR-6884-5p_MIMAT0027668_Homo_sapiens_miR-6884-5p	AGAGGCUGAGAAGGUGAUGUUG	CGCCCGCGACGAGCCUC&GAGGCUGAGAAGGUG	((((..(....((((((&))))))..)..))))	22,38	3,17	-9.81	-16.67	5.99	0.87
		BFRF1_3'_UTR_	162	232	CGGUGGUCCUGCGGGGGGUGACGGUCAGGCAGCUCCUGUAUUUAACUUUGCGGACAGAGGCCAGAGCCGU	hsa-miR-4433a-3p_MIMAT0018949_Homo_sapiens_miR-4433a-3p	ACAGGAGUGGGGGUGGGACAU	GUCAGGCAGCUCCUGU&ACAGGAGUGGGGGUGGGAC	(((..((.((((((((&))))))))....))..)))	24,39	2,20	-9.04	-16.66	7.05	0.57
		BFRF1_3'_UTR_	57	127	UCCGGGCAGUGCUGCCGCACAACGCGGCCUACGAGCUCGACCGUGGCUCCCGCCUCUUGGAUGCCAUCAU	hsa-miR-3670_MIMAT0018093_Homo_sapiens_miR-3670	AGAGCUCACAGCUGUCCUUCUCUA	GCGGCCUACGAGCUC&GAGCUCACAGCUGU	(((((....((((((&))))))...)))))	24,38	3,16	-1.26	-16.63	12.23	3.13
		BFRF1_3'_UTR_	434	504	UCCUAAAUUUCAAGAGCUGAACCAGAAUAAUCUCCCCAAUGAUGUUUUUCGGGAGGCUCAAAGAAGUUAC	hsa-miR-3150a-3p_MIMAT0015023_Homo_sapiens_miR-3150a-3p	CUGGGGAGAUCCUCGAGGUUGG	AUCUCCCCA&UGGGGAGAU	(((((((((&)))))))))	30,38	3,11	-7.46	-16.6	4.24	4.9
		BFRF1_3'_UTR_	0	70	UGGGCUGCCAGAGGCUGGCUGAGCCACCGAGCGCCCGCUCGGGCUGGCGGCCCCGAAUCCGGGCAGUGCU	hsa-miR-6877-3p_MIMAT0027655_Homo_sapiens_miR-6877-3p	CAGCCUCUGCCCUUGGCCUCC	GAAUCCGGGCAGUGCU&AGCCUCUGCCCUUGGCCUC	................&...................	55,70	3,21	-11.71	-16.47	1.26	3.5
		BFRF1_3'_UTR_	228	298	CCGUUUGCUCCAUCUGUCAGCAACGCCAAGCUCCAGAGGACGCCCGCGACGAGCCUCACCUGUUCUCCUC	hsa-miR-326_MIMAT0000756_Homo_sapiens_miR-326	CCUCUGGGCCCUUCCUCCAG	GAGGACGCCCGCGA&UCUGGGCCCUUCCUC	..............&...............	36,49	4,18	-3.48	-16.44	9.29	3.66
		BFRF1_3'_UTR_	515	585	GACAUCCCAGUUCUGCUACGAAGAGUACGUGCAGAGGACUUUUGGGGUGCCUCGGCGCCAACGCGCCAUA	hsa-miR-6780a-3p_MIMAT0027461_Homo_sapiens_miR-6780a-3p	CUCCUCUGUUUUCUUUCCUAG	CUACGAAGAGUACGUGCAGAGGA&UCCUCUGUUUUCUUUCCUAG	(((.(.((((.....((((((((&))))))))...))))).)))	16,38	3,22	-5.69	-16.36	10.62	0.05
		BFRF1_3'_UTR_	0	70	UGGGCUGCCAGAGGCUGGCUGAGCCACCGAGCGCCCGCUCGGGCUGGCGGCCCCGAAUCCGGGCAGUGCU	hsa-miR-3934-3p_MIMAT0022975_Homo_sapiens_miR-3934-3p	UGCUCAGGUUGCACAGCUGGGA	UCCGGGCAGUGC&GCACAGCUGGGA	(((.(((.((((&)))).))).)))	58,69	12,23	-9.76	-16.31	1.23	5.32
		BFRF1_3'_UTR_	453	523	AACCAGAAUAAUCUCCCCAAUGAUGUUUUUCGGGAGGCUCAAAGAAGUUACCUGGUAUUUCUGACAUCCC	hsa-miR-6778-3p_MIMAT0027457_Homo_sapiens_miR-6778-3p	UGCCUCCCUGACAUUCCACAG	GGGAGGC&GCCUCCC	(((((((&)))))))	32,38	3,9	-9.22	-16.3	6.61	0.47
		BFRF1_3'_UTR_	568	606	GGCGCCAACGCGCCAUAGACAAGAGGCAGAGAGCCAGU	hsa-miR-193b-3p_MIMAT0002819_Homo_sapiens_miR-193b-3p	AACUGGCCCUCAAAGUCCCGCU	GAGGCAGAGAGCCAGU&ACUGGCCCUCAAAGUCCC	................&..................	23,38	3,20	-10.97	-16.29	4.06	1.26
		BFRF1_3'_UTR_	567	606	CGGCGCCAACGCGCCAUAGACAAGAGGCAGAGAGCCAGU	hsa-miR-6504-5p_MIMAT0025464_Homo_sapiens_miR-6504-5p	UCUGGCUGUGCUGUAAUGCAG	GCAGAGAGCCAG&CUGGCUGUGCUGU	(((((.((((((&)))))).).))))	27,38	3,15	-9.25	-16.25	4.05	2.94
		BFRF1_3'_UTR_	94	164	CGACCGUGGCUCCCGCCUCUUGGAUGCCAUCAUCCCCUGCUUGGGACCCGACCGCACUUGCAUGCGGCCG	hsa-miR-6783-5p_MIMAT0027466_Homo_sapiens_miR-6783-5p	UAGGGGAAAAGUCCUGAUCCGG	UGGAUGCCAUCAUCCCCUG&UAGGGGAAAAGUCCUGAUCCG	.((((.....(.(((((((&)))))))...).....)))).	21,39	2,22	-3.58	-16.19	8.66	3.95
		BFRF1_3'_UTR_	353	423	CAGACGCGUUAUGGCACGCCGGCUGCCCAAGCCCACCCUCCAGGGGAGGCUGGAGGCGGAUUUUCCAGAC	hsa-miR-6766-5p_MIMAT0027432_Homo_sapiens_miR-6766-5p	CGGGUGGGAGCAGAUCUUAUUGAG	CCCACCC&GGGUGGG	(((((((&)))))))	32,38	3,9	-5.34	-16.1	6.95	3.81
		BFRF1_3'_UTR_	192	262	AGCUCCUGUAUUUAACUUUGCGGACAGAGGCCAGAGCCGUUUGCUCCAUCUGUCAGCAACGCCAAGCUCC	hsa-miR-6822-3p_MIMAT0027545_Homo_sapiens_miR-6822-3p	AGGCUCUAACUGGCUUUCCCUGCA	GGCCAGAGCC&GGCUCUAACUGGCU	((((((((((&))))))....))))	29,38	3,16	-6.94	-16.1	5.83	3.34
		BFRF1_3'_UTR_	160	230	GCCGGUGGUCCUGCGGGGGGUGACGGUCAGGCAGCUCCUGUAUUUAACUUUGCGGACAGAGGCCAGAGCC	hsa-miR-6500-5p_MIMAT0025454_Homo_sapiens_miR-6500-5p	AGGAGCUAUCCACUCCAGGUGUCC	GACGGUCAGGCAGCUCCU&AGGAGCUAUCCACUCCAGGUGUC	..................&.......................	22,39	2,24	-3.99	-15.98	7.42	4.57
		BFRF1_3'_UTR_	493	563	AAAGAAGUUACCUGGUAUUUCUGACAUCCCAGUUCUGCUACGAAGAGUACGUGCAGAGGACUUUUGGGGU	hsa-miR-298_MIMAT0004901_Homo_sapiens_miR-298	AGCAGAAGCAGGGAGGUUCUCCCA	AGAAGUUACCUGGUAUUUCUG&CAGAAGCAGGGAGGUUCU	((((.(..((((...((((((&))))))))))..).))))	3,23	4,21	-4.08	-15.92	3.66	8.18
		BFRF1_3'_UTR_	161	231	CCGGUGGUCCUGCGGGGGGUGACGGUCAGGCAGCUCCUGUAUUUAACUUUGCGGACAGAGGCCAGAGCCG	hsa-miR-28-5p_MIMAT0000085_Homo_sapiens_miR-28-5p	AAGGAGCUCACAGUCUAUUGAG	CGGUCAGGCAGCUCCU&AGGAGCUCACAGUCUAUUG	((((.(((((((((((&)))))))....))))))))	23,38	3,21	-6.93	-15.84	7.08	1.83
		BFRF1_3'_UTR_	352	422	UCAGACGCGUUAUGGCACGCCGGCUGCCCAAGCCCACCCUCCAGGGGAGGCUGGAGGCGGAUUUUCCAGA	hsa-miR-92a-2-5p_MIMAT0004508_Homo_sapiens_miR-92a-2-5p	GGGUGGGGAUUUGUUGCAUUAC	CCCACCC&GGGUGGG	(((((((&)))))))	33,39	2,8	-7.41	-15.8	6.74	1.65
		BFRF1_3'_UTR_	0	70	UGGGCUGCCAGAGGCUGGCUGAGCCACCGAGCGCCCGCUCGGGCUGGCGGCCCCGAAUCCGGGCAGUGCU	hsa-miR-2682-3p_MIMAT0013518_Homo_sapiens_miR-2682-3p	CGCCUCUUCAGCGCUGUCUUCC	GGGCAGUGCU&AGCGCUGUCU	((((((((((&))))))))))	61,70	11,20	-12.84	-15.8	1.22	1.74
		BFRF1_3'_UTR_	305	375	GAGGUAGAAUUGCCACCUGGUGAGCGGUGUGCGGGCUGCCGUCUCUAUCAGACGCGUUAUGGCACGCCGG	hsa-miR-4690-3p_MIMAT0019780_Homo_sapiens_miR-4690-3p	GCAGCCCAGCUGAGGCCUCUG	GGGCUGC&GCAGCCC	(((((((&)))))))	33,39	2,8	-9.17	-15.8	3.05	3.57
		BFRF1_3'_UTR_	288	358	UGUUCUCCUCCUGUUUAGAGGUAGAAUUGCCACCUGGUGAGCGGUGUGCGGGCUGCCGUCUCUAUCAGAC	hsa-miR-6753-5p_MIMAT0027406_Homo_sapiens_miR-6753-5p	CACCAGGGCAGAGCAGGGCUGA	UGCCACCUGGUG&CACCAGGGCA	(((..(((((((&))))))))))	28,39	2,11	-7.12	-15.79	6.61	2.06
		BFRF1_3'_UTR_	270	340	CCCGCGACGAGCCUCACCUGUUCUCCUCCUGUUUAGAGGUAGAAUUGCCACCUGGUGAGCGGUGUGCGGG	hsa-miR-520f-5p_MIMAT0026609_Homo_sapiens_miR-520f-5p	CCUCUAAAGGGAAGCGCUUUCU	GUUCUCCUCCUGUUUAGAGG&CCUCUAAAGGGAAGCGC	....................&.................	20,39	2,18	-4.95	-15.76	8.42	2.39
		BFRF1_3'_UTR_	553	606	CUUUUGGGGUGCCUCGGCGCCAACGCGCCAUAGACAAGAGGCAGAGAGCCAGU	hsa-miR-3655_MIMAT0018075_Homo_sapiens_miR-3655	GCUUGUCGCUGCGGUGUUGCU	AACGCGCCAUAGACAAG&CUUGUCGCUGCGGUGUU	(((((..((..((((((&))))))..))..)))))	22,38	3,19	-5.03	-15.72	6.98	3.71
		BFRF1_3'_UTR_	352	422	UCAGACGCGUUAUGGCACGCCGGCUGCCCAAGCCCACCCUCCAGGGGAGGCUGGAGGCGGAUUUUCCAGA	hsa-miR-654-5p_MIMAT0003330_Homo_sapiens_miR-654-5p	UGGUGGGCCGCAGAACAUGUGC	ACGCGUUAUGGCACGCC&GGUGGGCCGCAGAACAUGU	(((.(((.((((.((((&)))).))))...))).)))	5,21	3,21	-8.61	-15.66	4.28	2.77
		BFRF1_3'_UTR_	161	231	CCGGUGGUCCUGCGGGGGGUGACGGUCAGGCAGCUCCUGUAUUUAACUUUGCGGACAGAGGCCAGAGCCG	hsa-miR-708-5p_MIMAT0004926_Homo_sapiens_miR-708-5p	AAGGAGCUUACAAUCUAGCUGGG	CGGUCAGGCAGCUCCU&AGGAGCUUACAAUCUAGCUG	((((.(((.(((((((&))))))).....))).))))	23,38	3,22	-4.82	-15.65	7.08	3.75
		BFRF1_3'_UTR_	471	541	AAUGAUGUUUUUCGGGAGGCUCAAAGAAGUUACCUGGUAUUUCUGACAUCCCAGUUCUGCUACGAAGAGU	hsa-miR-6753-5p_MIMAT0027406_Homo_sapiens_miR-6753-5p	CACCAGGGCAGAGCAGGGCUGA	CCAGUUCUGCU&GGCAGAGCAGG	((.((((((((&)))))))).))	51,61	8,18	-11.95	-15.61	1.89	1.77
		BFRF1_3'_UTR_	486	556	GAGGCUCAAAGAAGUUACCUGGUAUUUCUGACAUCCCAGUUCUGCUACGAAGAGUACGUGCAGAGGACUU	hsa-miR-5089-5p_MIMAT0021081_Homo_sapiens_miR-5089-5p	GUGGGAUUUCUGAGUAGCAUC	UGGUAUUUCUGACAUCCCA&UGGGAUUUCUGAGUAGCA	((.(((((..((.((((((&)))))).)).))))).))	20,38	3,20	-9.6	-15.55	5.36	0.59
		BFRF1_3'_UTR_	0	70	UGGGCUGCCAGAGGCUGGCUGAGCCACCGAGCGCCCGCUCGGGCUGGCGGCCCCGAAUCCGGGCAGUGCU	hsa-miR-4767_MIMAT0019919_Homo_sapiens_miR-4767	CGCGGGCGCUCCUGGCCGCCGCC	CCGGGCAGUGC&GCGCUCCUGG	(((((.(((((&))))))))))	59,69	7,16	-10.12	-15.51	1.23	4.15
		BFRF1_3'_UTR_	128	198	CCCUGCUUGGGACCCGACCGCACUUGCAUGCGGCCGGUGGUCCUGCGGGGGGUGACGGUCAGGCAGCUCC	ebv-miR-BART13-5p_MIMAT0004818	AACCGGCUCGUGGCUCGUACAG	GUGACGGUCAGGCAGCU&GGCUCGUGGCUCGUAC	.................&................	52,68	6,21	-9.67	-15.41	2.37	3.37
		BFRF1_3'_UTR_	260	330	CCAGAGGACGCCCGCGACGAGCCUCACCUGUUCUCCUCCUGUUUAGAGGUAGAAUUGCCACCUGGUGAGC	hsa-miR-4784_MIMAT0019948_Homo_sapiens_miR-4784	UGAGGAGAUGCUGGGACUGA	CCUGUUCUCCUC&GAGGAGAUGCUGG	((.(((((((((&))))))).)).))	27,38	3,15	-8.66	-15.4	6.17	0.56
		BFRF1_3'_UTR_	285	355	ACCUGUUCUCCUCCUGUUUAGAGGUAGAAUUGCCACCUGGUGAGCGGUGUGCGGGCUGCCGUCUCUAUCA	hsa-miR-6865-5p_MIMAT0027630_Homo_sapiens_miR-6865-5p	UAGGUGGCAGAGGAGGGACUUCA	UGCCACCU&AGGUGGCA	((((((((&))))))))	31,38	3,10	-13.61	-15.2	1.51	0.08
		BFRF1_3'_UTR_	353	423	CAGACGCGUUAUGGCACGCCGGCUGCCCAAGCCCACCCUCCAGGGGAGGCUGGAGGCGGAUUUUCCAGAC	hsa-miR-363-5p_MIMAT0003385_Homo_sapiens_miR-363-5p	CGGGUGGAUCACGAUGCAAUUU	GCGUUAUGGCACGCC&GGUGGAUCACGAUGC	(((((.(((..((((&))))..))).)))))	6,20	4,18	-8.91	-15.15	4.53	1.7
		BFRF1_3'_UTR_	355	425	GACGCGUUAUGGCACGCCGGCUGCCCAAGCCCACCCUCCAGGGGAGGCUGGAGGCGGAUUUUCCAGACAG	hsa-miR-6804-5p_MIMAT0027508_Homo_sapiens_miR-6804-5p	UGAGGGUGUCAGCAGGUGACG	CGCGUUAUGGCACGCC&GGGUGUCAGCAGGUG	(((.(..((((((.(.&).))))))..).)))	3,18	5,19	-6.47	-15.12	4.76	3.89
		BFRF1_3'_UTR_	421	491	ACAGUCCCCUGCUUCCUAAAUUUCAAGAGCUGAACCAGAAUAAUCUCCCCAAUGAUGUUUUUCGGGAGGC	hsa-miR-29b-1-5p_MIMAT0004514_Homo_sapiens_miR-29b-1-5p	GCUGGUUUCAUAUGGUGGUUUAGA	CUAAAUUUCAAGAGCUGAACCAG&CUGGUUUCAUAUGGUGGUUUAG	(((((((.(.......(((((((&)))))))......).)))))))	16,38	3,24	-10.38	-15.11	3.13	1.6
		BFRF1_3'_UTR_	204	274	UAACUUUGCGGACAGAGGCCAGAGCCGUUUGCUCCAUCUGUCAGCAACGCCAAGCUCCAGAGGACGCCCG	hsa-miR-8082_MIMAT0031009_Homo_sapiens_miR-8082	UGAUGGAGCUGGGAAUACUCUG	CCAAGCUCCA&UGGAGCUGGG	((.(((((((&))))))))).	50,59	5,14	-10.37	-15.1	2.34	2.39
		BFRF1_3'_UTR_	96	166	ACCGUGGCUCCCGCCUCUUGGAUGCCAUCAUCCCCUGCUUGGGACCCGACCGCACUUGCAUGCGGCCGGU	hsa-miR-6132_MIMAT0024616_Homo_sapiens_miR-6132	AGCAGGGCUGGGGAUUGCA	AUCCCCUGCUU&GGGCUGGGGAU	((((((.(((.&.))).))))))	30,40	6,16	-8.71	-15.01	4.8	1.5
		BFRF1_3'_UTR_	231	301	UUUGCUCCAUCUGUCAGCAACGCCAAGCUCCAGAGGACGCCCGCGACGAGCCUCACCUGUUCUCCUCCUG	hsa-miR-6852-3p_MIMAT0027605_Homo_sapiens_miR-6852-3p	UGUCCUCUGUUCCUCAG	CAGAGGAC&GUCCUCUG	((((((((&))))))))	31,38	3,10	-7.41	-15	7.02	0.57
		BFRF1_3'_UTR_	164	234	GUGGUCCUGCGGGGGGUGACGGUCAGGCAGCUCCUGUAUUUAACUUUGCGGACAGAGGCCAGAGCCGUUU	hsa-miR-7151-3p_MIMAT0028213_Homo_sapiens_miR-7151-3p	CUACAGGCUGGAAUGGGCUCA	GAGGCCAGAGCC&GGCUGGAAUGGGCUC	(((.(((.((((&))))....))).)))	55,66	7,21	-6.75	-15	4.58	3.67
		BFRF1_3'_UTR_	396	466	GGGAGGCUGGAGGCGGAUUUUCCAGACAGUCCCCUGCUUCCUAAAUUUCAAGAGCUGAACCAGAAUAAUC	ebv-miR-BART20-5p_MIMAT0003719	UAGCAGGCAUGUCUUCAUUCC	AGACAGUCCCCUGCU&AGCAGGCAUGUCU	(((((....((((((&))))))..)))))	24,38	3,15	-3.37	-14.96	9.83	1.76
		BFRF1_3'_UTR_	202	272	UUUAACUUUGCGGACAGAGGCCAGAGCCGUUUGCUCCAUCUGUCAGCAACGCCAAGCUCCAGAGGACGCC	hsa-miR-6874-5p_MIMAT0027648_Homo_sapiens_miR-6874-5p	AUGGAGCUGGAACCAGAUCAGGC	CCAAGCUCCA&UGGAGCUGG	((.(((((((&)))))))))	52,61	3,11	-9.51	-14.93	2.99	2.44
		BFRF1_3'_UTR_	303	373	UAGAGGUAGAAUUGCCACCUGGUGAGCGGUGUGCGGGCUGCCGUCUCUAUCAGACGCGUUAUGGCACGCC	hsa-miR-4707-3p_MIMAT0019808_Homo_sapiens_miR-4707-3p	AGCCCGCCCCAGCCGAGGUUCU	GCGGGCU&AGCCCGC	(((((((&)))))))	33,39	2,8	-6.91	-14.9	4.62	3.38
		BFRF1_3'_UTR_	0	70	UGGGCUGCCAGAGGCUGGCUGAGCCACCGAGCGCCCGCUCGGGCUGGCGGCCCCGAAUCCGGGCAGUGCU	hsa-miR-6499-5p_MIMAT0025450_Homo_sapiens_miR-6499-5p	UCGGGCGCAAGAGCACUGCAGU	GCAGUGCU&AGCACUGC	((((((((&))))))))	63,70	13,20	-10.35	-14.9	0.62	3.94
		BFRF1_3'_UTR_	204	274	UAACUUUGCGGACAGAGGCCAGAGCCGUUUGCUCCAUCUGUCAGCAACGCCAAGCUCCAGAGGACGCCCG	hsa-miR-4534_MIMAT0019073_Homo_sapiens_miR-4534	GGAUGGAGGAGGGGUCU	AGAGCCGUUUGCUCCA&UGGAGGAGGGGUCU	(((.((.((..(((((&))))))).)).)))	21,36	5,18	-8.09	-14.88	5.85	0.95
		BFRF1_3'_UTR_	193	263	GCUCCUGUAUUUAACUUUGCGGACAGAGGCCAGAGCCGUUUGCUCCAUCUGUCAGCAACGCCAAGCUCCA	hsa-miR-6741-3p_MIMAT0027384_Homo_sapiens_miR-6741-3p	UCGGCUCUCUCCCUCACCCUAG	GGCCAGAGCCG&CGGCUCUCUCC	((..(((((((&)))))))..))	28,38	3,13	-8.4	-14.72	5.83	0.48
		BFRF1_3'_UTR_	129	199	CCUGCUUGGGACCCGACCGCACUUGCAUGCGGCCGGUGGUCCUGCGGGGGGUGACGGUCAGGCAGCUCCU	hsa-miR-181d-3p_MIMAT0026608_Homo_sapiens_miR-181d-3p	CCACCGGGGGAUGAAUGUCAC	GUGACGGUCAGGCAGCUCC&GGGGGAUGAAUGUCAC	((((((.(((.....((((&))))..))).))))))	51,69	7,22	-8.35	-14.66	4.55	1.75
		BFRF1_3'_UTR_	563	606	GCCUCGGCGCCAACGCGCCAUAGACAAGAGGCAGAGAGCCAGU	hsa-miR-6817-3p_MIMAT0027535_Homo_sapiens_miR-6817-3p	UCUCUCUGACUCCAUGGCA	GAGGCAGAGAG&CUCUCUGACUC	(((.(((((((&))))))).)))	28,38	3,13	-7.82	-14.66	6.46	0.37
		BFRF1_3'_UTR_	492	562	CAAAGAAGUUACCUGGUAUUUCUGACAUCCCAGUUCUGCUACGAAGAGUACGUGCAGAGGACUUUUGGGG	hsa-miR-589-3p_MIMAT0003256_Homo_sapiens_miR-589-3p	UCAGAACAAAUGCCGGUUCCCAGA	CUGGUAUUUCUGA&UCAGAACAAAUGCCGG	(((((((((((((&))))))...)))))))	13,25	2,17	-8.43	-14.62	3.67	2.53
		BFRF1_3'_UTR_	395	465	GGGGAGGCUGGAGGCGGAUUUUCCAGACAGUCCCCUGCUUCCUAAAUUUCAAGAGCUGAACCAGAAUAAU	hsa-miR-6132_MIMAT0024616_Homo_sapiens_miR-6132	AGCAGGGCUGGGGAUUGCA	CAGUCCCC&GGGGAUUG	((((((((&))))))))	28,35	11,18	-7.06	-14.6	5.66	1.88
		BFRF1_3'_UTR_	455	525	CCAGAAUAAUCUCCCCAAUGAUGUUUUUCGGGAGGCUCAAAGAAGUUACCUGGUAUUUCUGACAUCCCAG	hsa-miR-2114-3p_MIMAT0011157_Homo_sapiens_miR-2114-3p	CGAGCCUCAAGCAAGGGACUU	GAGGCUC&GAGCCUC	(((((((&)))))))	32,38	3,9	-6.34	-14.5	4.98	3.18
		BFRF1_3'_UTR_	433	503	UUCCUAAAUUUCAAGAGCUGAACCAGAAUAAUCUCCCCAAUGAUGUUUUUCGGGAGGCUCAAAGAAGUUA	hsa-miR-3175_MIMAT0015052_Homo_sapiens_miR-3175	CGGGGAGAGAACGCAGUGACGU	UCUCCCC&GGGGAGA	(((((((&)))))))	32,38	3,9	-9.91	-14.5	4.17	0.42
		BFRF1_3'_UTR_	259	329	UCCAGAGGACGCCCGCGACGAGCCUCACCUGUUCUCCUCCUGUUUAGAGGUAGAAUUGCCACCUGGUGAG	hsa-miR-6888-5p_MIMAT0027676_Homo_sapiens_miR-6888-5p	AAGGAGAUGCUCAGGCAGAU	CCUGUUCUCCUCCU&AGGAGAUGCUCAGG	((((..(..(((((&)))))..)..))))	28,41	3,16	-5.82	-14.49	6.24	2.43
		BFRF1_3'_UTR_	567	606	CGGCGCCAACGCGCCAUAGACAAGAGGCAGAGAGCCAGU	hsa-miR-4794_MIMAT0019967_Homo_sapiens_miR-4794	UCUGGCUAUCUCACGAGACUGU	AUAGACAAGAGGCAGAGAGCCAG&CUGGCUAUCUCACGAGACUGU	.......................&.....................	16,38	3,23	-8.17	-14.21	4.07	1.97
		BFRF1_3'_UTR_	352	422	UCAGACGCGUUAUGGCACGCCGGCUGCCCAAGCCCACCCUCCAGGGGAGGCUGGAGGCGGAUUUUCCAGA	hsa-miR-541-3p_MIMAT0004920_Homo_sapiens_miR-541-3p	UGGUGGGCACAGAAUCUGGACU	UCAGACGCGUUAUGGCACGCC&GGUGGGCACAGAAUCUGG	.((((..(....((.(.((((&))))).))..)..)))).	1,21	3,20	-7.83	-14.16	4.28	2.05
		BFRF1_3'_UTR_	391	461	UCCAGGGGAGGCUGGAGGCGGAUUUUCCAGACAGUCCCCUGCUUCCUAAAUUUCAAGAGCUGAACCAGAA	hsa-miR-365b-5p_MIMAT0022833_Homo_sapiens_miR-365b-5p	AGGGACUUUCAGGGGCAGCUGU	AGCUGAACCAGAA&UUCAGGGGCAGCU	(((((..((.((.&.)).))..)))))	58,70	9,21	-11.12	-14.11	1.15	1.84
		BFRF1_3'_UTR_	557	606	UGGGGUGCCUCGGCGCCAACGCGCCAUAGACAAGAGGCAGAGAGCCAGU	hsa-miR-2682-3p_MIMAT0013518_Homo_sapiens_miR-2682-3p	CGCCUCUUCAGCGCUGUCUUCC	AGACAAGAGGC&GCCUCUUCAGCGCUGUCU	(((((((((((&)))))).......)))))	28,38	3,20	-5.23	-14.09	7.12	1.74
		BFRF1_3'_UTR_	228	298	CCGUUUGCUCCAUCUGUCAGCAACGCCAAGCUCCAGAGGACGCCCGCGACGAGCCUCACCUGUUCUCCUC	hsa-miR-6764-3p_MIMAT0027429_Homo_sapiens_miR-6764-3p	UCUCUGGUCUUUCCUUGACAG	CUGUCAGCAACGCCAAGCUCCAGA&UCUGGUCUUUCCUUGACAG	(((((((....(..(((..(((((&))))).)))..))))))))	14,37	4,22	-2.16	-14.08	9.45	2.47
		BFRF1_3'_UTR_	190	260	GCAGCUCCUGUAUUUAACUUUGCGGACAGAGGCCAGAGCCGUUUGCUCCAUCUGUCAGCAACGCCAAGCU	hsa-miR-518c-5p_MIMAT0002847_Homo_sapiens_miR-518c-5p	UCUCUGGAGGGAAGCACUUUCUG	CAGAGCCGUUUGCUCCA&UGGAGGGAAGCACUUUCUG	(((((...(((.(((((&))))).))).....)))))	34,50	6,24	-4.03	-14.07	5.83	4.22
		BFRF1_3'_UTR_	566	606	UCGGCGCCAACGCGCCAUAGACAAGAGGCAGAGAGCCAGU	hsa-miR-8057_MIMAT0030984_Homo_sapiens_miR-8057	GUGGCUCUGUAGUAAGAUGGA	CAAGAGGCAGAGAGCCA&UGGCUCUGUAGUAAGAUG	.................&..................	22,38	3,20	-8.44	-14.03	4.07	1.52
		BFRF1_3'_UTR_	477	547	GUUUUUCGGGAGGCUCAAAGAAGUUACCUGGUAUUUCUGACAUCCCAGUUCUGCUACGAAGAGUACGUGC	hsa-miR-5680_MIMAT0022468_Homo_sapiens_miR-5680	GAGAAAUGCUGGACUAAUCUGC	AGAAGUUACCUGGUAUUUCU&AGAAAUGCUGGACUAAUCU	....................&...................	19,38	3,21	-7.32	-14.02	5.82	0.88
		BFRF1_3'_UTR_	158	228	CGGCCGGUGGUCCUGCGGGGGGUGACGGUCAGGCAGCUCCUGUAUUUAACUUUGCGGACAGAGGCCAGAG	hsa-miR-22-3p_MIMAT0000077_Homo_sapiens_miR-22-3p	AAGCUGCCAGUUGAAGAACUGU	GGCAGCU&AGCUGCC	(((((((&)))))))	32,38	3,9	-6.83	-14	4.46	2.71
		BFRF1_3'_UTR_	127	197	CCCCUGCUUGGGACCCGACCGCACUUGCAUGCGGCCGGUGGUCCUGCGGGGGGUGACGGUCAGGCAGCUC	hsa-miR-6850-3p_MIMAT0027601_Homo_sapiens_miR-6850-3p	CCCGGCCGGAACGCCGCACU	GUGACGGUCAGGC&GCCGGAACGCCGCAC	(((.((((..(((&))).....)))))))	53,65	6,20	-7.33	-13.87	0.95	5.59
		BFRF1_3'_UTR_	227	297	GCCGUUUGCUCCAUCUGUCAGCAACGCCAAGCUCCAGAGGACGCCCGCGACGAGCCUCACCUGUUCUCCU	hsa-miR-1299_MIMAT0005887_Homo_sapiens_miR-1299	UUCUGGAAUUCUGUGUGAGGGA	CCUCACCUGUUCUCC&GGAAUUCUGUGUGAGG	...............&................	55,69	6,21	-10.46	-13.82	1.93	1.43
		BFRF1_3'_UTR_	392	462	CCAGGGGAGGCUGGAGGCGGAUUUUCCAGACAGUCCCCUGCUUCCUAAAUUUCAAGAGCUGAACCAGAAU	hsa-miR-3144-5p_MIMAT0015014_Homo_sapiens_miR-3144-5p	AGGGGACCAAAGAGAUAUAUAG	GUCCCCU&AGGGGAC	(((((((&)))))))	33,39	2,8	-5.38	-13.8	8.19	0.23
		BFRF1_3'_UTR_	307	377	GGUAGAAUUGCCACCUGGUGAGCGGUGUGCGGGCUGCCGUCUCUAUCAGACGCGUUAUGGCACGCCGGCU	hsa-miR-885-3p_MIMAT0004948_Homo_sapiens_miR-885-3p	AGGCAGCGGGGUGUAGUGGAUA	AUUGCCACCUGGUG&CAGCGGGGUGUAGU	(((((..((((.((&)).))))..)))))	7,20	5,18	-8.65	-13.77	3.79	1.33
		BFRF1_3'_UTR_	369	439	CGCCGGCUGCCCAAGCCCACCCUCCAGGGGAGGCUGGAGGCGGAUUUUCCAGACAGUCCCCUGCUUCCUA	hsa-miR-6720-5p_MIMAT0027345_Homo_sapiens_miR-6720-5p	UUCCAGCCCUGGUAGGCGCCGCG	CGCCGGCUGCC&GGCGCCGCG	((.((((.(((&)))))))))	1,11	16,24	-8.16	-13.76	2.64	2.95
		BFRF1_3'_UTR_	400	470	GGCUGGAGGCGGAUUUUCCAGACAGUCCCCUGCUUCCUAAAUUUCAAGAGCUGAACCAGAAUAAUCUCCC	hsa-miR-6876-5p_MIMAT0027652_Homo_sapiens_miR-6876-5p	CAGGAAGGAGACAGGCAGUUCA	GAGCUGAACCAGAAUAAUCUCC&GGAGACAGGCAGUUC	((((((..((.(.....(((((&)))))).))))))))	48,69	8,22	-11.24	-13.74	1.68	0.83
		BFRF1_3'_UTR_	366	436	GCACGCCGGCUGCCCAAGCCCACCCUCCAGGGGAGGCUGGAGGCGGAUUUUCCAGACAGUCCCCUGCUUC	hsa-miR-6819-3p_MIMAT0027539_Homo_sapiens_miR-6819-3p	AAGCCUCUGUCCCCACCCCAG	GGGGAGGC&GCCUCUGUCCCC	((((((((&)))))...))).	30,37	4,15	-6.57	-13.72	6.98	0.17
		BFRF1_3'_UTR_	161	231	CCGGUGGUCCUGCGGGGGGUGACGGUCAGGCAGCUCCUGUAUUUAACUUUGCGGACAGAGGCCAGAGCCG	ebv-miR-BART2-3p_MIMAT0004744	AAGGAGCGAUUUGGAGAAAAUAAA	UCAGGCAGCUCCU&AGGAGCGAUUUGG	.((((..((((((&))))))..)))).	26,38	3,15	-6.36	-13.71	7.03	0.33
		BFRF1_3'_UTR_	384	454	CCCACCCUCCAGGGGAGGCUGGAGGCGGAUUUUCCAGACAGUCCCCUGCUUCCUAAAUUUCAAGAGCUGA	hsa-miR-516b-5p_MIMAT0002859_Homo_sapiens_miR-516b-5p	AUCUGGAGGUAAGAAGCACUUU	CCUCCAG&CUGGAGG	(((((((&)))))))	6,12	4,10	-8.96	-13.7	3.3	1.44
		BFRF1_3'_UTR_	528	598	UGCUACGAAGAGUACGUGCAGAGGACUUUUGGGGUGCCUCGGCGCCAACGCGCCAUAGACAAGAGGCAGA	hsa-miR-593-5p_MIMAT0003261_Homo_sapiens_miR-593-5p	AGGCACCAGCCAGGCAUUGCUCAGC	GGUGCCU&AGGCACC	(((((((&)))))))	33,39	2,8	-4.73	-13.7	6.1	2.87
		BFRF1_3'_UTR_	0	70	UGGGCUGCCAGAGGCUGGCUGAGCCACCGAGCGCCCGCUCGGGCUGGCGGCCCCGAAUCCGGGCAGUGCU	hsa-miR-4690-3p_MIMAT0019780_Homo_sapiens_miR-4690-3p	GCAGCCCAGCUGAGGCCUCUG	CAGAGGCU&GGCCUCUG	((((((((&))))))))	9,16	15,22	-6.78	-13.7	6.42	0.49
		BFRF1_3'_UTR_	353	423	CAGACGCGUUAUGGCACGCCGGCUGCCCAAGCCCACCCUCCAGGGGAGGCUGGAGGCGGAUUUUCCAGAC	hsa-miR-4483_MIMAT0019017_Homo_sapiens_miR-4483	GGGGUGGUCUGUUGUUG	GGCUGCCC&GGGUGGUC	((((((((&))))))))	21,28	3,10	-7.29	-13.61	5.97	0.34
		BFRF1_3'_UTR_	353	423	CAGACGCGUUAUGGCACGCCGGCUGCCCAAGCCCACCCUCCAGGGGAGGCUGGAGGCGGAUUUUCCAGAC	hsa-miR-1293_MIMAT0005883_Homo_sapiens_miR-1293	UGGGUGGUCUGGAGAUUUGUGC	UUUCCAGAC&GUCUGGAGA	(((((((((&)))))))))	62,70	8,16	-12.35	-13.6	0.61	0.64
		BFRF1_3'_UTR_	484	554	GGGAGGCUCAAAGAAGUUACCUGGUAUUUCUGACAUCCCAGUUCUGCUACGAAGAGUACGUGCAGAGGAC	hsa-miR-4764-5p_MIMAT0019914_Homo_sapiens_miR-4764-5p	UGGAUGUGGAAGGAGUUAUCU	GGUAUUUCUGACAUCC&GGAUGUGGAAGGAGUUAUC	(((((((((.((((((&))))))...)))))).)))	23,38	3,21	-5.54	-13.6	6.78	1.28
		BFRF1_3'_UTR_	203	273	UUAACUUUGCGGACAGAGGCCAGAGCCGUUUGCUCCAUCUGUCAGCAACGCCAAGCUCCAGAGGACGCCC	hsa-miR-4802-5p_MIMAT0019981_Homo_sapiens_miR-4802-5p	UAUGGAGGUUCUAGACCAUGUU	GGCCAGAGCCGUUUGCUCCA&UGGAGGUUCUAGACC	(((.((((((......((((&)))))))))).).))	18,37	4,18	-4.6	-13.43	5.84	2.98
		BFRF1_3'_UTR_	523	593	AGUUCUGCUACGAAGAGUACGUGCAGAGGACUUUUGGGGUGCCUCGGCGCCAACGCGCCAUAGACAAGAG	hsa-miR-186-3p_MIMAT0004612_Homo_sapiens_miR-186-3p	GCCCAAAGGUGAAUUUUUUGGG	ACUUUUGGG&CCCAAAGGU	(((((((((&)))))))))	30,38	3,11	-3.15	-13.41	3.05	7.21
		BFRF1_3'_UTR_	190	260	GCAGCUCCUGUAUUUAACUUUGCGGACAGAGGCCAGAGCCGUUUGCUCCAUCUGUCAGCAACGCCAAGCU	hsa-miR-6764-3p_MIMAT0027429_Homo_sapiens_miR-6764-3p	UCUCUGGUCUUUCCUUGACAG	GGCCAGAG&CUCUGGUC	((((((((&))))))))	31,38	3,10	-5.14	-13.4	5.81	2.45
		BFRF1_3'_UTR_	190	260	GCAGCUCCUGUAUUUAACUUUGCGGACAGAGGCCAGAGCCGUUUGCUCCAUCUGUCAGCAACGCCAAGCU	hsa-miR-6824-3p_MIMAT0027549_Homo_sapiens_miR-6824-3p	UCUCUGGUCUUGCCACCCCAG	GGCCAGAG&CUCUGGUC	((((((((&))))))))	31,38	3,10	-4.81	-13.4	5.81	2.78
		BFRF1_3'_UTR_	560	606	GGUGCCUCGGCGCCAACGCGCCAUAGACAAGAGGCAGAGAGCCAGU	hsa-miR-4727-5p_MIMAT0019847_Homo_sapiens_miR-4727-5p	AUCUGCCAGCUUCCACAGUGG	CCAUAGACAAGAGGCAGA&UCUGCCAGCUUCCACAGUGG	((((....(((.((((((&))))))..))).....))))	21,38	3,22	-4.2	-13.39	7.88	1.32
		BFRF1_3'_UTR_	378	448	CCCAAGCCCACCCUCCAGGGGAGGCUGGAGGCGGAUUUUCCAGACAGUCCCCUGCUUCCUAAAUUUCAAG	hsa-miR-605-5p_MIMAT0003273_Homo_sapiens_miR-605-5p	UAAAUCCCAUGGUGCCUUCUCCU	GGGGAGGC&GCCUUCUC	((((((((&))))))))	18,25	15,22	-2.1	-13.3	10.41	0.79
		BFRF1_3'_UTR_	13	83	GCUGGCUGAGCCACCGAGCGCCCGCUCGGGCUGGCGGCCCCGAAUCCGGGCAGUGCUGCCGCACAACGCG	hsa-miR-4632-3p_MIMAT0019688_Homo_sapiens_miR-4632-3p	UGCCGCCCUCUCGCUGCUCUAG	GGCGGC&GCCGCC	((((((&))))))	33,38	3,8	-4.16	-13.3	5.95	3.19
		BFRF1_3'_UTR_	207	277	CUUUGCGGACAGAGGCCAGAGCCGUUUGCUCCAUCUGUCAGCAACGCCAAGCUCCAGAGGACGCCCGCGA	hsa-miR-5683_MIMAT0022472_Homo_sapiens_miR-5683	UACAGAUGCAGAUUCUCUGACUUC	CAGAGCCGUUUGC&GCAGAUUCUCUG	(((((..((((((&)))))).)))))	17,29	9,20	-5.43	-13.15	4.68	3.04
		BFRF1_3'_UTR_	511	581	UUCUGACAUCCCAGUUCUGCUACGAAGAGUACGUGCAGAGGACUUUUGGGGUGCCUCGGCGCCAACGCGC	hsa-miR-3130-3p_MIMAT0014994_Homo_sapiens_miR-3130-3p	GCUGCACCGGAGACUGGGUAA	UACGAAGAGUACGUGCAG&CUGCACCGGAGACUGGGUA	(((..((....(((((((&)))))).)....))..)))	21,38	3,21	-1.46	-12.98	6.44	5.08
		BFRF1_3'_UTR_	212	282	CGGACAGAGGCCAGAGCCGUUUGCUCCAUCUGUCAGCAACGCCAAGCUCCAGAGGACGCCCGCGACGAGC	hsa-miR-628-5p_MIMAT0004809_Homo_sapiens_miR-628-5p	AUGCUGACAUAUUUACUAGAGG	UGUCAGCA&UGCUGACA	((((((((&))))))))	31,38	3,10	-9.92	-12.9	2.76	0.22
		BFRF1_3'_UTR_	568	606	GGCGCCAACGCGCCAUAGACAAGAGGCAGAGAGCCAGU	hsa-miR-193a-3p_MIMAT0000459_Homo_sapiens_miR-193a-3p	AACUGGCCUACAAAGUCCCAGU	GAGGCAGAGAGCCAGU&ACUGGCCUACAAAGUCCC	................&..................	23,38	3,20	-4.05	-12.84	4.06	4.72
		BFRF1_3'_UTR_	435	505	CCUAAAUUUCAAGAGCUGAACCAGAAUAAUCUCCCCAAUGAUGUUUUUCGGGAGGCUCAAAGAAGUUACC	hsa-miR-450a-2-3p_MIMAT0031074_Homo_sapiens_miR-450a-2-3p	AUUGGGGACAUUUUGCAUUCAU	UCCCCAAU&AUUGGGGA	((((((((&))))))))	32,39	2,9	-11.88	-12.8	0.04	0.88
		BFRF1_3'_UTR_	487	557	AGGCUCAAAGAAGUUACCUGGUAUUUCUGACAUCCCAGUUCUGCUACGAAGAGUACGUGCAGAGGACUUU	hsa-miR-619-5p_MIMAT0026622_Homo_sapiens_miR-619-5p	GCUGGGAUUACAGGCAUGAGCC	AUCCCAGU&GCUGGGAU	((((((((&))))))))	32,39	2,9	-8.84	-12.8	2.85	1.11
		BFRF1_3'_UTR_	185	255	GUCAGGCAGCUCCUGUAUUUAACUUUGCGGACAGAGGCCAGAGCCGUUUGCUCCAUCUGUCAGCAACGCC	hsa-miR-2682-3p_MIMAT0013518_Homo_sapiens_miR-2682-3p	CGCCUCUUCAGCGCUGUCUUCC	AGGCAGCUCCUG&CAGCGCUGUCU	(((((((..(((&))).)))))))	4,15	10,20	-7.62	-12.73	3.37	1.74
		BFRF1_3'_UTR_	0	70	UGGGCUGCCAGAGGCUGGCUGAGCCACCGAGCGCCCGCUCGGGCUGGCGGCCCCGAAUCCGGGCAGUGCU	hsa-miR-6819-3p_MIMAT0027539_Homo_sapiens_miR-6819-3p	AAGCCUCUGUCCCCACCCCAG	GGGCAGUGCU&AGCCUCUGUCC	((((((.(((&)))..))))))	61,70	3,13	-11.33	-12.72	1.22	0.16
		BFRF1_3'_UTR_	540	606	UACGUGCAGAGGACUUUUGGGGUGCCUCGGCGCCAACGCGCCAUAGACAAGAGGCAGAGAGCCAGU	hsa-miR-1306-3p_MIMAT0005950_Homo_sapiens_miR-1306-3p	ACGUUGGCUCUGGUGGUG	AGAGCCAG&UUGGCUCU	(((((((.&.)))))))	58,65	5,12	-9.05	-12.7	3.24	0.41
		BFRF1_3'_UTR_	370	440	GCCGGCUGCCCAAGCCCACCCUCCAGGGGAGGCUGGAGGCGGAUUUUCCAGACAGUCCCCUGCUUCCUAA	hsa-miR-3925-3p_MIMAT0019228_Homo_sapiens_miR-3925-3p	ACUCCAGUUUUAGUUCUCUUG	GGCUGGAG&CUCCAGUU	.(((((((&))))))).	31,38	3,10	-3.58	-12.7	8.97	0.16
		BFRF1_3'_UTR_	305	375	GAGGUAGAAUUGCCACCUGGUGAGCGGUGUGCGGGCUGCCGUCUCUAUCAGACGCGUUAUGGCACGCCGG	hsa-miR-5685_MIMAT0022475_Homo_sapiens_miR-5685	ACAGCCCAGCAGUUAUCACGGG	GGGCUG&CAGCCC	((((((&))))))	33,38	3,8	-7.99	-12.7	2.91	1.8
		BFRF1_3'_UTR_	249	319	AACGCCAAGCUCCAGAGGACGCCCGCGACGAGCCUCACCUGUUCUCCUCCUGUUUAGAGGUAGAAUUGCC	hsa-miR-1294_MIMAT0005884_Homo_sapiens_miR-1294	UGUGAGGUUGGCAUUGUUGUCU	AGCCUCAC&GUGAGGUU	.(((((((&))))))).	31,38	3,10	-11.39	-12.6	1.19	0.02
		BFRF1_3'_UTR_	227	297	GCCGUUUGCUCCAUCUGUCAGCAACGCCAAGCUCCAGAGGACGCCCGCGACGAGCCUCACCUGUUCUCCU	hsa-miR-5706_MIMAT0022500_Homo_sapiens_miR-5706	UUCUGGAUAACAUGCUGAAGCU	AGCCUCACCUGUUCUCC&GGAUAACAUGCUGAAGCU	(((.((((.((((.(((&))).)))).).))).)))	53,69	6,23	-9.61	-12.6	1.95	1.04
		BFRF1_3'_UTR_	182	252	ACGGUCAGGCAGCUCCUGUAUUUAACUUUGCGGACAGAGGCCAGAGCCGUUUGCUCCAUCUGUCAGCAAC	hsa-miR-6888-3p_MIMAT0027677_Homo_sapiens_miR-6888-3p	AUCUGUCUCGAUUGUUUCCAG	ACGGUCAGGCAG&CUGUCUCGAUUGU	((((((((((((&)))))).))))))	1,12	4,16	-8.12	-12.52	3.85	0.54
		BFRF1_3'_UTR_	441	511	UUUCAAGAGCUGAACCAGAAUAAUCUCCCCAAUGAUGUUUUUCGGGAGGCUCAAAGAAGUUACCUGGUAU	ebv-miR-BART4-3p_MIMAT0009204	CACAUCACGUAGGCACCAGGUGU	UACCUGGU&ACCAGGUG	((((((((&))))))))	61,68	16,23	-9.43	-12.5	0.17	2.9
		BFRF1_3'_UTR_	291	361	UCUCCUCCUGUUUAGAGGUAGAAUUGCCACCUGGUGAGCGGUGUGCGGGCUGCCGUCUCUAUCAGACGCG	hsa-miR-6511b-3p_MIMAT0025848_Homo_sapiens_miR-6511b-3p	CCUCACCACCCCUUCUGCCUGCA	UGCGGGC&GCCUGCA	(((((((&)))))))	44,50	18,24	-10.87	-12.5	1.58	0.05
		BFRF1_3'_UTR_	71	141	CCGCACAACGCGGCCUACGAGCUCGACCGUGGCUCCCGCCUCUUGGAUGCCAUCAUCCCCUGCUUGGGAC	hsa-miR-6746-5p_MIMAT0027392_Homo_sapiens_miR-6746-5p	CCGGGAGAAGGAGGUGGCCUGG	CGCCUCUU&AGGAGGUG	(((((((.&.)))))))	37,44	10,17	-11.53	-12.4	0.43	0.44
		BFRF1_3'_UTR_	453	523	AACCAGAAUAAUCUCCCCAAUGAUGUUUUUCGGGAGGCUCAAAGAAGUUACCUGGUAUUUCUGACAUCCC	hsa-miR-6791-3p_MIMAT0027483_Homo_sapiens_miR-6791-3p	UGCCUCCUUGGUCUCCGGCAG	GGAGGCUCAA&UUGGUCUCC	..........&.........	33,42	9,17	-5.57	-12.32	6.54	0.2
		BFRF1_3'_UTR_	75	145	ACAACGCGGCCUACGAGCUCGACCGUGGCUCCCGCCUCUUGGAUGCCAUCAUCCCCUGCUUGGGACCCGA	hsa-miR-3197_MIMAT0015082_Homo_sapiens_miR-3197	GGAGGCGCAGGCUCGGAAAGGCG	CGCCUCU&GGAGGCG	(((((((&)))))))	33,39	2,8	-10.26	-12.3	0.4	1.63
		BFRF1_3'_UTR_	236	306	UCCAUCUGUCAGCAACGCCAAGCUCCAGAGGACGCCCGCGACGAGCCUCACCUGUUCUCCUCCUGUUUAG	hsa-miR-6499-5p_MIMAT0025450_Homo_sapiens_miR-6499-5p	UCGGGCGCAAGAGCACUGCAGU	CGCCCG&CGGGCG	((((((&))))))	33,38	3,8	-7.95	-12.3	0.63	3.72
		BFRF1_3'_UTR_	458	528	GAAUAAUCUCCCCAAUGAUGUUUUUCGGGAGGCUCAAAGAAGUUACCUGGUAUUUCUGACAUCCCAGUUC	hsa-miR-8055_MIMAT0030982_Homo_sapiens_miR-8055	CUUUGAGCACAUGAGCAGACGGA	GCUCAAAG&CUUUGAGC	((((((((&))))))))	32,39	2,9	-7.87	-12.3	2.37	2.06
		BFRF1_3'_UTR_	567	606	CGGCGCCAACGCGCCAUAGACAAGAGGCAGAGAGCCAGU	hsa-miR-664a-5p_MIMAT0005948_Homo_sapiens_miR-664a-5p	ACUGGCUAGGGAAAAUGAUUGGAU	CAAGAGGCAGAGAGCCAGU&ACUGGCUAGGGAAAAUGAUUG	...................&.....................	21,39	2,22	-7.7	-12.26	4.06	0.5
		BFRF1_3'_UTR_	289	359	GUUCUCCUCCUGUUUAGAGGUAGAAUUGCCACCUGGUGAGCGGUGUGCGGGCUGCCGUCUCUAUCAGACG	hsa-miR-1226-3p_MIMAT0005577_Homo_sapiens_miR-1226-3p	UCACCAGCCCUGUGUUCCCUAG	GGGCUG&CAGCCC	((((((&))))))	49,54	6,11	-9.21	-12.2	2.78	0.21
		BFRF1_3'_UTR_	374	444	GCUGCCCAAGCCCACCCUCCAGGGGAGGCUGGAGGCGGAUUUUCCAGACAGUCCCCUGCUUCCUAAAUUU	hsa-miR-4485-5p_MIMAT0032116_Homo_sapiens_miR-4485-5p	ACCGCCUGCCCAGUGA	AGGCGG&CCGCCU	((((((&))))))	33,38	3,8	-6.58	-12.2	4.9	0.72
		BFRF1_3'_UTR_	224	294	AGAGCCGUUUGCUCCAUCUGUCAGCAACGCCAAGCUCCAGAGGACGCCCGCGACGAGCCUCACCUGUUCU	hsa-miR-6500-5p_MIMAT0025454_Homo_sapiens_miR-6500-5p	AGGAGCUAUCCACUCCAGGUGUCC	GGACGCC&GGUGUCC	(((((((&)))))))	42,48	19,25	-7.26	-12.2	4.85	0.09
		BFRF1_3'_UTR_	562	606	UGCCUCGGCGCCAACGCGCCAUAGACAAGAGGCAGAGAGCCAGU	hsa-miR-3191-5p_MIMAT0022732_Homo_sapiens_miR-3191-5p	CUCUCUGGCCGUCUACCUUCCA	AGAGAGCCAG&CUGGCCGUCU	(((..(((((&)))))..)))	34,43	6,15	-10.51	-12.13	1.05	0.57
		BFRF1_3'_UTR_	304	374	AGAGGUAGAAUUGCCACCUGGUGAGCGGUGUGCGGGCUGCCGUCUCUAUCAGACGCGUUAUGGCACGCCG	hsa-miR-3940-3p_MIMAT0018356_Homo_sapiens_miR-3940-3p	CAGCCCGGAUCCCAGCCCACUU	GGGCUG&CAGCCC	((((((&))))))	34,39	2,7	-9.01	-12.1	2.91	0.19
		BFRF1_3'_UTR_	162	232	CGGUGGUCCUGCGGGGGGUGACGGUCAGGCAGCUCCUGUAUUUAACUUUGCGGACAGAGGCCAGAGCCGU	hsa-miR-4768-3p_MIMAT0019921_Homo_sapiens_miR-4768-3p	CCAGGAGAUCCAGAGAGAAU	CGGUCAGGCAGCUCCUG&CAGGAGAUCCAGAGAG	.................&................	22,38	3,18	-4	-12.1	7.06	1.04
		BFRF1_3'_UTR_	487	557	AGGCUCAAAGAAGUUACCUGGUAUUUCUGACAUCCCAGUUCUGCUACGAAGAGUACGUGCAGAGGACUUU	hsa-miR-204-3p_MIMAT0022693_Homo_sapiens_miR-204-3p	GCUGGGAAGGCAAAGGGACGU	CAUCCCAGU&GCUGGGAAG	.........&.........	31,39	2,10	-6.99	-12.02	2.92	2.1
		BFRF1_3'_UTR_	224	294	AGAGCCGUUUGCUCCAUCUGUCAGCAACGCCAAGCUCCAGAGGACGCCCGCGACGAGCCUCACCUGUUCU	hsa-miR-4633-3p_MIMAT0019690_Homo_sapiens_miR-4633-3p	AGGAGCUAGCCAGGCAUAUGCA	GCCUCACCUGUUCU&GGAGCUAGCCAGGC	((((..(..(((((&)))))..)..))))	57,70	3,16	-6.51	-12.02	3.1	2.42
		BFRF1_3'_UTR_	332	402	UGUGCGGGCUGCCGUCUCUAUCAGACGCGUUAUGGCACGCCGGCUGCCCAAGCCCACCCUCCAGGGGAGG	hsa-miR-1227-3p_MIMAT0005580_Homo_sapiens_miR-1227-3p	CGUGCCACCCUUUUCCCCAG	UGGCACG&CGUGCCA	(((((((&)))))))	33,39	2,8	-6.83	-12	5.15	0.03
		BFRF1_3'_UTR_	530	600	CUACGAAGAGUACGUGCAGAGGACUUUUGGGGUGCCUCGGCGCCAACGCGCCAUAGACAAGAGGCAGAGA	hsa-miR-1827_MIMAT0006767_Homo_sapiens_miR-1827	UGAGGCAGUAGAUUGAAU	GGUGCCUC&GAGGCAGU	........&........	31,38	3,10	-4.29	-12	7.56	0.16
		BFRF1_3'_UTR_	247	317	GCAACGCCAAGCUCCAGAGGACGCCCGCGACGAGCCUCACCUGUUCUCCUCCUGUUUAGAGGUAGAAUUG	hsa-miR-3975_MIMAT0019360_Homo_sapiens_miR-3975	UGAGGCUAAUGCACUACUUCAC	AGCCUCA&UGAGGCU	(((((((&)))))))	33,39	2,8	-7.85	-12	1.16	2.99
		BFRF1_3'_UTR_	285	355	ACCUGUUCUCCUCCUGUUUAGAGGUAGAAUUGCCACCUGGUGAGCGGUGUGCGGGCUGCCGUCUCUAUCA	hsa-miR-6815-5p_MIMAT0027530_Homo_sapiens_miR-6815-5p	UAGGUGGCGCCGGAGGAGUCAUU	UCCUCCUGU&GCCGGAGGA	((((((.((&)).))))))	9,17	10,18	-7.87	-12	1.98	2.15
		BFRF1_3'_UTR_	263	333	GAGGACGCCCGCGACGAGCCUCACCUGUUCUCCUCCUGUUUAGAGGUAGAAUUGCCACCUGGUGAGCGGU	hsa-miR-4768-3p_MIMAT0019921_Homo_sapiens_miR-4768-3p	CCAGGAGAUCCAGAGAGAAU	CUGUUCUCCU&AGGAGAUCCAG	(((.((((((&))))))..)))	25,34	4,14	-6.94	-11.82	3.84	1.04
		BFRF1_3'_UTR_	434	504	UCCUAAAUUUCAAGAGCUGAACCAGAAUAAUCUCCCCAAUGAUGUUUUUCGGGAGGCUCAAAGAAGUUAC	hsa-miR-2110_MIMAT0010133_Homo_sapiens_miR-2110	UUGGGGAAACGGCCGCUGAGUG	UCCCCAA&UUGGGGA	((((((.&.))))))	33,39	2,8	-8.97	-11.8	0.04	2.79
		BFRF1_3'_UTR_	430	500	UGCUUCCUAAAUUUCAAGAGCUGAACCAGAAUAAUCUCCCCAAUGAUGUUUUUCGGGAGGCUCAAAGAAG	hsa-miR-5186_MIMAT0021116_Homo_sapiens_miR-5186	AGAGAUUGGUAGAAAUCAGGU	CUGAACCAGAAUAAUCUC&GAGAUUGGUAGAAAUCAG	((((.......(((((((&))))))).......))))	21,38	3,20	-4.63	-11.79	4.99	2.17
		BFRF1_3'_UTR_	286	356	CCUGUUCUCCUCCUGUUUAGAGGUAGAAUUGCCACCUGGUGAGCGGUGUGCGGGCUGCCGUCUCUAUCAG	hsa-miR-764_MIMAT0010367_Homo_sapiens_miR-764	GCAGGUGCUCACUUGUCCUCCU	GGUGAGC&GCUCACU	(((((((&)))))))	38,44	8,14	-6.6	-11.7	1.89	3.2
		BFRF1_3'_UTR_	415	485	UUCCAGACAGUCCCCUGCUUCCUAAAUUUCAAGAGCUGAACCAGAAUAAUCUCCCCAAUGAUGUUUUUCG	hsa-miR-6736-3p_MIMAT0027374_Homo_sapiens_miR-6736-3p	UCAGCUCCUCUCUACCCACAG	GAGCUGA&UCAGCUC	(((((((&)))))))	33,39	2,8	-10.31	-11.7	1.37	0.02
		BFRF1_3'_UTR_	386	456	CACCCUCCAGGGGAGGCUGGAGGCGGAUUUUCCAGACAGUCCCCUGCUUCCUAAAUUUCAAGAGCUGAAC	hsa-miR-4288_MIMAT0016918_Homo_sapiens_miR-4288	UUGUCUGCUGAGUUUCC	GGAUUUUCCAGACA&UGUCUGCUGAGUUUCC	(((..(((((((((&))))))..)))..)))	25,38	3,18	-6.98	-11.67	4.44	0.26
		BFRF1_3'_UTR_	278	348	GAGCCUCACCUGUUCUCCUCCUGUUUAGAGGUAGAAUUGCCACCUGGUGAGCGGUGUGCGGGCUGCCGUC	hsa-miR-5571-5p_MIMAT0022257_Homo_sapiens_miR-5571-5p	CAAUUCUCAAAGGAGCCUCCC	GAGGUAGAAUUG&CAAUUCUCAAAGGAGCCUC	((((((((((((&))))))).......)))))	28,39	2,20	-6.26	-11.62	3.8	1.56
		BFRF1_3'_UTR_	210	280	UGCGGACAGAGGCCAGAGCCGUUUGCUCCAUCUGUCAGCAACGCCAAGCUCCAGAGGACGCCCGCGACGA	hsa-miR-6730-3p_MIMAT0027362_Homo_sapiens_miR-6730-3p	CCUGACACCCCAUCUGCCCUCA	GAGGCCAGA&UCUGCCCUC	((((.((((&)))).))))	9,17	14,22	-5.33	-11.61	6.21	0.07
		BFRF1_3'_UTR_	434	504	UCCUAAAUUUCAAGAGCUGAACCAGAAUAAUCUCCCCAAUGAUGUUUUUCGGGAGGCUCAAAGAAGUUAC	hsa-miR-6857-5p_MIMAT0027614_Homo_sapiens_miR-6857-5p	UUGGGGAUUGGGUCAGGCCAGU	UCCCCAA&UUGGGGA	((((((.&.))))))	33,39	2,8	-10.57	-11.6	0.04	0.99
		BFRF1_3'_UTR_	432	502	CUUCCUAAAUUUCAAGAGCUGAACCAGAAUAAUCUCCCCAAUGAUGUUUUUCGGGAGGCUCAAAGAAGUU	hsa-miR-8085_MIMAT0031012_Homo_sapiens_miR-8085	UGGGAGAGAGGACUGUGAGGC	UCUCCCCA&UGGGAGAGA	........&.........	33,40	2,10	-6.99	-11.6	4.17	0.44
		BFRF1_3'_UTR_	257	327	GCUCCAGAGGACGCCCGCGACGAGCCUCACCUGUUCUCCUCCUGUUUAGAGGUAGAAUUGCCACCUGGUG	hsa-miR-589-5p_MIMAT0004799_Homo_sapiens_miR-589-5p	UGAGAACCACGUCUGCUCUGAG	CAGAGGACG&CGUCUGCUCUG	(((((((((&))))..)))))	5,13	11,21	-5.98	-11.54	4.23	1.33
		BFRF1_3'_UTR_	230	300	GUUUGCUCCAUCUGUCAGCAACGCCAAGCUCCAGAGGACGCCCGCGACGAGCCUCACCUGUUCUCCUCCU	hsa-miR-6780a-3p_MIMAT0027461_Homo_sapiens_miR-6780a-3p	CUCCUCUGUUUUCUUUCCUAG	CAGAGGA&UCCUCUG	(((((((&)))))))	32,38	3,9	-3.79	-11.5	7.68	0.03
		BFRF1_3'_UTR_	91	161	GCUCGACCGUGGCUCCCGCCUCUUGGAUGCCAUCAUCCCCUGCUUGGGACCCGACCGCACUUGCAUGCGG	hsa-miR-1255b-5p_MIMAT0005945_Homo_sapiens_miR-1255b-5p	CGGAUGAGCAAAGAAAGUGGUU	GCUCGACCG&CGGAUGAGC	(((((.(((&))).)))))	1,9	2,10	-9.93	-11.49	1.27	0.29
		BFRF1_3'_UTR_	0	70	UGGGCUGCCAGAGGCUGGCUGAGCCACCGAGCGCCCGCUCGGGCUGGCGGCCCCGAAUCCGGGCAGUGCU	hsa-miR-518c-5p_MIMAT0002847_Homo_sapiens_miR-518c-5p	UCUCUGGAGGGAAGCACUUUCUG	CGGGCAGUGCU&AGCACUUUCUG	((((.((((((&)))))).))))	60,70	14,24	-7.95	-11.48	1.23	2.29
		BFRF1_3'_UTR_	410	480	GGAUUUUCCAGACAGUCCCCUGCUUCCUAAAUUUCAAGAGCUGAACCAGAAUAAUCUCCCCAAUGAUGUU	hsa-miR-4635_MIMAT0019692_Homo_sapiens_miR-4635	UCUUGAAGUCAGAACCCGCAA	UGCUUCCUAAAUUUCAAGA&UCUUGAAGUCAGAACCCGCA	(((.......(((((((((&)))))))))........)))	21,39	2,21	-8.66	-11.44	2.27	0.52
		BFRF1_3'_UTR_	424	494	GUCCCCUGCUUCCUAAAUUUCAAGAGCUGAACCAGAAUAAUCUCCCCAAUGAUGUUUUUCGGGAGGCUCA	hsa-miR-4778-5p_MIMAT0019936_Homo_sapiens_miR-4778-5p	AAUUCUGUAAAGGAAGAAGAGG	CCCCUGCUUCCU&AGGAAGAAGAGG	.((((.((((((&)))))).)).))	3,14	12,23	-9.03	-11.38	0.09	2.25
		BFRF1_3'_UTR_	434	504	UCCUAAAUUUCAAGAGCUGAACCAGAAUAAUCUCCCCAAUGAUGUUUUUCGGGAGGCUCAAAGAAGUUAC	hsa-miR-6763-5p_MIMAT0027426_Homo_sapiens_miR-6763-5p	CUGGGGAGUGGCUGGGGAG	UCCCCA&UGGGGA	((((((&))))))	33,38	14,19	-8.25	-11.3	0.04	3.01
		BFRF1_3'_UTR_	0	70	UGGGCUGCCAGAGGCUGGCUGAGCCACCGAGCGCCCGCUCGGGCUGGCGGCCCCGAAUCCGGGCAGUGCU	hsa-miR-5588-5p_MIMAT0022295_Homo_sapiens_miR-5588-5p	ACUGGCAUUAGUGGGACUUUU	UCCGGGCAGUGCU&GGCAUUAGUGGGA	(((.(..((((((&))))))..).)))	58,70	5,17	-7.63	-11.24	1.23	2.38
		BFRF1_3'_UTR_	1	71	GGGCUGCCAGAGGCUGGCUGAGCCACCGAGCGCCCGCUCGGGCUGGCGGCCCCGAAUCCGGGCAGUGCUG	hsa-miR-4781-5p_MIMAT0019942_Homo_sapiens_miR-4781-5p	UAGCGGGGAUUCCAAUAUUGG	GAAUCCGGGC&GCGGGGAUUC	((((((..((&))..))))))	54,63	4,13	-8.11	-11.21	1.61	1.49
		BFRF1_3'_UTR_	283	353	UCACCUGUUCUCCUCCUGUUUAGAGGUAGAAUUGCCACCUGGUGAGCGGUGUGCGGGCUGCCGUCUCUAU	hsa-miR-3688-5p_MIMAT0019223_Homo_sapiens_miR-3688-5p	AGUGGCAAAGUCUUUCCAUAU	UUGCCAC&GUGGCAA	.((((((&)))))).	32,38	3,9	-6.89	-11.2	1.59	2.72
		BFRF1_3'_UTR_	466	536	UCCCCAAUGAUGUUUUUCGGGAGGCUCAAAGAAGUUACCUGGUAUUUCUGACAUCCCAGUUCUGCUACGA	ebv-miR-BART13-3p_MIMAT0003424	UGUAACUUGCCAGGGACGGCUGA	CCUGGU&GCCAGG	((((((&))))))	38,43	10,15	-6.19	-11.1	0.83	4.08
		BFRF1_3'_UTR_	433	503	UUCCUAAAUUUCAAGAGCUGAACCAGAAUAAUCUCCCCAAUGAUGUUUUUCGGGAGGCUCAAAGAAGUUA	hsa-miR-1343-5p_MIMAT0027038_Homo_sapiens_miR-1343-5p	UGGGGAGCGGCCCCCGGGUGGG	UCCCCA&UGGGGA	((((((&))))))	34,39	2,7	-7.24	-11.1	0.04	3.82
		BFRF1_3'_UTR_	291	361	UCUCCUCCUGUUUAGAGGUAGAAUUGCCACCUGGUGAGCGGUGUGCGGGCUGCCGUCUCUAUCAGACGCG	hsa-miR-6511a-3p_MIMAT0025479_Homo_sapiens_miR-6511a-3p	CCUCACCAUCCCUUCUGCCUGC	UGGUGAG&CUCACCA	(((((((&)))))))	32,38	3,9	-10.12	-11.1	0.96	0.02
		BFRF1_3'_UTR_	433	503	UUCCUAAAUUUCAAGAGCUGAACCAGAAUAAUCUCCCCAAUGAUGUUUUUCGGGAGGCUCAAAGAAGUUA	hsa-miR-6825-5p_MIMAT0027550_Homo_sapiens_miR-6825-5p	UGGGGAGGUGUGGAGUCAGCAU	UCCCCA&UGGGGA	((((((&))))))	34,39	2,7	-11.01	-11.1	0.04	0.05
		BFRF1_3'_UTR_	386	456	CACCCUCCAGGGGAGGCUGGAGGCGGAUUUUCCAGACAGUCCCCUGCUUCCUAAAUUUCAAGAGCUGAAC	hsa-miR-1231_MIMAT0005586_Homo_sapiens_miR-1231	GUGUCUGGGCGGACAGCUGC	CCAGAC&GUCUGG	((((((&))))))	32,37	4,9	-7.38	-11	1.99	1.63
		BFRF1_3'_UTR_	50	120	CCCCGAAUCCGGGCAGUGCUGCCGCACAACGCGGCCUACGAGCUCGACCGUGGCUCCCGCCUCUUGGAUG	hsa-miR-5704_MIMAT0022498_Homo_sapiens_miR-5704	UUAGGCCAUCAUCCCAUUAUGC	GGCCUA&UAGGCC	((((((&))))))	33,38	3,8	-4.68	-11	5.83	0.49
		BFRF1_3'_UTR_	456	526	CAGAAUAAUCUCCCCAAUGAUGUUUUUCGGGAGGCUCAAAGAAGUUACCUGGUAUUUCUGACAUCCCAGU	hsa-miR-6807-5p_MIMAT0027514_Homo_sapiens_miR-6807-5p	GUGAGCCAGUGGAAUGGAGAGG	GGCUCA&UGAGCC	((((((&))))))	33,38	3,8	-7.11	-11	1.31	2.57
		BFRF1_3'_UTR_	408	478	GCGGAUUUUCCAGACAGUCCCCUGCUUCCUAAAUUUCAAGAGCUGAACCAGAAUAAUCUCCCCAAUGAUG	hsa-miR-203a-3p_MIMAT0000264_Homo_sapiens_miR-203a-3p	GUGAAAUGUUUAGGACCACUAG	UCCUAAAUUUCA&UGAAAUGUUUAGGA	((((((((((((&))))..))))))))	27,38	3,16	-8.44	-10.95	1.17	1.33
		BFRF1_3'_UTR_	561	606	GUGCCUCGGCGCCAACGCGCCAUAGACAAGAGGCAGAGAGCCAGU	hsa-miR-6728-3p_MIMAT0027358_Homo_sapiens_miR-6728-3p	UCUCUGCUCUGCUCUCCCCAG	GAGAGCCAGU&GCUCUGCUCUC	..........&...........	36,45	7,17	-10.62	-10.94	0.02	0.29
		BFRF1_3'_UTR_	435	505	CCUAAAUUUCAAGAGCUGAACCAGAAUAAUCUCCCCAAUGAUGUUUUUCGGGAGGCUCAAAGAAGUUACC	hsa-miR-5572_MIMAT0022260_Homo_sapiens_miR-5572	GUUGGGGUGCAGGGGUCUGCU	CCCCAAU&GUUGGGG	(((((((&)))))))	33,39	2,8	-10.85	-10.9	0.04	0.01
		BFRF1_3'_UTR_	286	356	CCUGUUCUCCUCCUGUUUAGAGGUAGAAUUGCCACCUGGUGAGCGGUGUGCGGGCUGCCGUCUCUAUCAG	hsa-miR-125a-3p_MIMAT0004602_Homo_sapiens_miR-125a-3p	ACAGGUGAGGUUCUUGGGAGCC	CACCUG&CAGGUG	((((((&))))))	33,38	3,8	-6	-10.8	4.79	0.02
		BFRF1_3'_UTR_	195	265	UCCUGUAUUUAACUUUGCGGACAGAGGCCAGAGCCGUUUGCUCCAUCUGUCAGCAACGCCAAGCUCCAGA	hsa-miR-337-5p_MIMAT0004695_Homo_sapiens_miR-337-5p	GAACGGCUUCAUACAGGAGUU	UCCUGUAU&AUACAGGA	((((((((&))))))))	1,8	12,19	-5.86	-10.8	1.34	3.6
		BFRF1_3'_UTR_	0	70	UGGGCUGCCAGAGGCUGGCUGAGCCACCGAGCGCCCGCUCGGGCUGGCGGCCCCGAAUCCGGGCAGUGCU	hsa-miR-423-3p_MIMAT0001340_Homo_sapiens_miR-423-3p	AGCUCGGUCUGAGGCCCCUCAGU	CCGGGC&GCUCGG	((((((&))))))	59,64	3,8	-9.52	-10.8	1.23	0.05
		BFRF1_3'_UTR_	434	504	UCCUAAAUUUCAAGAGCUGAACCAGAAUAAUCUCCCCAAUGAUGUUUUUCGGGAGGCUCAAAGAAGUUAC	hsa-miR-6810-5p_MIMAT0027520_Homo_sapiens_miR-6810-5p	AUGGGGACAGGGAUCAGCAUGGC	UCCCCA&UGGGGA	((((((&))))))	33,38	3,8	-9.93	-10.8	0.04	0.82
		BFRF1_3'_UTR_	462	532	AAUCUCCCCAAUGAUGUUUUUCGGGAGGCUCAAAGAAGUUACCUGGUAUUUCUGACAUCCCAGUUCUGCU	hsa-miR-4778-3p_MIMAT0019937_Homo_sapiens_miR-4778-3p	UCUUCUUCCUUUGCAGAGUUGA	CAGUUCUGC&GCAGAGUUG	(((((((((&)))))))))	61,69	14,22	-8.07	-10.77	1.24	1.46
		BFRF1_3'_UTR_	174	244	GGGGGGUGACGGUCAGGCAGCUCCUGUAUUUAACUUUGCGGACAGAGGCCAGAGCCGUUUGCUCCAUCUG	hsa-miR-520h_MIMAT0002867_Homo_sapiens_miR-520h	ACAAAGUGCUUCCCUUUAGAGU	GGGGGGU&GCUUCCC	(((((((&)))))))	1,7	9,15	-1.96	-10.6	7.92	0.72
		BFRF1_3'_UTR_	103	173	CUCCCGCCUCUUGGAUGCCAUCAUCCCCUGCUUGGGACCCGACCGCACUUGCAUGCGGCCGGUGGUCCUG	hsa-miR-4433a-5p_MIMAT0020956_Homo_sapiens_miR-4433a-5p	CGUCCCACCCCCCACUCCUGU	UGGGAC&GUCCCA	((((((&))))))	33,38	3,8	-4.26	-10.5	6.21	0.03
		BFRF1_3'_UTR_	0	70	UGGGCUGCCAGAGGCUGGCUGAGCCACCGAGCGCCCGCUCGGGCUGGCGGCCCCGAAUCCGGGCAGUGCU	hsa-miR-885-3p_MIMAT0004948_Homo_sapiens_miR-885-3p	AGGCAGCGGGGUGUAGUGGAUA	AUCCGGGCAGUGCU&AGCGGGGUGUAGUGGAU	..............&.................	57,70	6,22	-7.92	-10.48	1.23	1.33
		BFRF1_3'_UTR_	278	348	GAGCCUCACCUGUUCUCCUCCUGUUUAGAGGUAGAAUUGCCACCUGGUGAGCGGUGUGCGGGCUGCCGUC	ebv-miR-BHRF1-2-5p_MIMAT0000996	AAAUUCUGUUGCAGCAGAUAGC	CUGUUUAGAGGUAGAAUU&AAUUCUGUUGCAGCAG	(((((....(((((((((&)))))))))..)))))	21,38	3,18	-2.21	-10.4	4	4.19
		BFRF1_3'_UTR_	115	185	GGAUGCCAUCAUCCCCUGCUUGGGACCCGACCGCACUUGCAUGCGGCCGGUGGUCCUGCGGGGGGUGACG	hsa-miR-519b-3p_MIMAT0002837_Homo_sapiens_miR-519b-3p	AAAGUGCAUCCUUUUAGAGGUU	GGAUGCC&GUGCAUCC	.......&........	1,7	5,12	-8.19	-10.4	0.42	1.79
		BFRF1_3'_UTR_	115	185	GGAUGCCAUCAUCCCCUGCUUGGGACCCGACCGCACUUGCAUGCGGCCGGUGGUCCUGCGGGGGGUGACG	hsa-miR-519a-3p_MIMAT0002869_Homo_sapiens_miR-519a-3p	AAAGUGCAUCCUUUUAGAGUGU	GGAUGCC&GUGCAUCC	.......&........	1,7	5,12	-8.64	-10.4	0.42	1.35
		BFRF1_3'_UTR_	454	524	ACCAGAAUAAUCUCCCCAAUGAUGUUUUUCGGGAGGCUCAAAGAAGUUACCUGGUAUUUCUGACAUCCCA	hsa-miR-6819-3p_MIMAT0027539_Homo_sapiens_miR-6819-3p	AAGCCUCUGUCCCCACCCCAG	GAGGCU&AGCCUC	((((((&))))))	33,38	3,8	-5.37	-10.4	4.91	0.12
		BFRF1_3'_UTR_	61	131	GGCAGUGCUGCCGCACAACGCGGCCUACGAGCUCGACCGUGGCUCCCGCCUCUUGGAUGCCAUCAUCCCC	hsa-miR-412-5p_MIMAT0026557_Homo_sapiens_miR-412-5p	UGGUCGACCAGUUGGAAAGUAAU	UCGACC&GGUCGA	((((((&))))))	33,38	3,8	-6.52	-10.3	2.8	0.98
		BFRF1_3'_UTR_	365	435	GGCACGCCGGCUGCCCAAGCCCACCCUCCAGGGGAGGCUGGAGGCGGAUUUUCCAGACAGUCCCCUGCUU	hsa-miR-6791-3p_MIMAT0027483_Homo_sapiens_miR-6791-3p	UGCCUCCUUGGUCUCCGGCAG	GCCGG&CCGGC	(((((&)))))	6,10	16,20	-6.66	-10.3	1.82	1.82
		BFRF1_3'_UTR_	454	524	ACCAGAAUAAUCUCCCCAAUGAUGUUUUUCGGGAGGCUCAAAGAAGUUACCUGGUAUUUCUGACAUCCCA	hsa-miR-6877-3p_MIMAT0027655_Homo_sapiens_miR-6877-3p	CAGCCUCUGCCCUUGGCCUCC	GAGGCU&AGCCUC	((((((&))))))	33,38	3,8	-4.03	-10.3	4.91	1.36
		BFRF1_3'_UTR_	283	353	UCACCUGUUCUCCUCCUGUUUAGAGGUAGAAUUGCCACCUGGUGAGCGGUGUGCGGGCUGCCGUCUCUAU	hsa-miR-891a-3p_MIMAT0026717_Homo_sapiens_miR-891a-3p	AGUGGCACAUGUUUGUUGUGAG	UGCCAC&GUGGCA	((((((&))))))	33,38	3,8	-6.52	-10.2	0.93	2.75
		BFRF1_3'_UTR_	90	160	AGCUCGACCGUGGCUCCCGCCUCUUGGAUGCCAUCAUCCCCUGCUUGGGACCCGACCGCACUUGCAUGCG	hsa-miR-3682-3p_MIMAT0018110_Homo_sapiens_miR-3682-3p	UGAUGAUACAGGUGGAGGUAG	CUCGACC&GGUGGAG	(((.(((&))).)))	3,9	12,18	-9.21	-10.1	0.85	0.03
		BFRF1_3'_UTR_	402	472	CUGGAGGCGGAUUUUCCAGACAGUCCCCUGCUUCCUAAAUUUCAAGAGCUGAACCAGAAUAAUCUCCCCA	hsa-miR-651-5p_MIMAT0003321_Homo_sapiens_miR-651-5p	UUUAGGAUAAGCUUGACUUUUG	GCUUCCUAAA&UUUAGGAUAAGC	(((((((((.&.))))))..)))	30,39	2,13	-7.07	-10.01	1.81	1.13
		BFRF1_3'_UTR_	379	449	CCAAGCCCACCCUCCAGGGGAGGCUGGAGGCGGAUUUUCCAGACAGUCCCCUGCUUCCUAAAUUUCAAGA	hsa-miR-4668-3p_MIMAT0019746_Homo_sapiens_miR-4668-3p	GAAAAUCCUUUUUGUUUUUCCAG	GGAUUUUC&GAAAAUCC	((((((((&))))))))	32,39	2,9	-3.63	-10.01	5.07	1.31
		BFRF1_3'_UTR_	188	258	AGGCAGCUCCUGUAUUUAACUUUGCGGACAGAGGCCAGAGCCGUUUGCUCCAUCUGUCAGCAACGCCAAG	hsa-miR-3190-5p_MIMAT0015073_Homo_sapiens_miR-3190-5p	UCUGGCCAGCUACGUCCCCA	GGCCA&UGGCC	(((((&)))))	33,37	4,8	-8.63	-10	0.43	0.93
		BFRF1_3'_UTR_	70	140	GCCGCACAACGCGGCCUACGAGCUCGACCGUGGCUCCCGCCUCUUGGAUGCCAUCAUCCCCUGCUUGGGA	hsa-miR-4300_MIMAT0016853_Homo_sapiens_miR-4300	UGGGAGCUGGACUACUUC	CGAGCUC&GAGCUGG	(.(((((&))))).)	19,25	5,11	-7.67	-10	1.85	0.48
		BFRF1_3'_UTR_	382	452	AGCCCACCCUCCAGGGGAGGCUGGAGGCGGAUUUUCCAGACAGUCCCCUGCUUCCUAAAUUUCAAGAGCU	hsa-miR-3978_MIMAT0019363_Homo_sapiens_miR-3978	GUGGAAAGCAUGCAUCCAGGGUGU	CACCCU&AGGGUG	((((((&))))))	5,10	19,24	-5.5	-10	2.56	1.94
		BFRF1_3'_UTR_	228	298	CCGUUUGCUCCAUCUGUCAGCAACGCCAAGCUCCAGAGGACGCCCGCGACGAGCCUCACCUGUUCUCCUC	hsa-miR-518c-5p_MIMAT0002847_Homo_sapiens_miR-518c-5p	UCUCUGGAGGGAAGCACUUUCUG	UGUUCUCCUC&GAGGGAAGCA	((((.(((((&))))).))))	61,70	8,17	-4.03	-9.97	1.73	4.21
		BFRF1_3'_UTR_	298	368	CUGUUUAGAGGUAGAAUUGCCACCUGGUGAGCGGUGUGCGGGCUGCCGUCUCUAUCAGACGCGUUAUGGC	hsa-miR-1228-3p_MIMAT0005583_Homo_sapiens_miR-1228-3p	UCACACCUGCCUCGCCCCCC	GGUGAGC&GCCUCGCC	.......&........	26,32	10,17	-9.64	-9.93	0.18	0.11
		BFRF1_3'_UTR_	0	70	UGGGCUGCCAGAGGCUGGCUGAGCCACCGAGCGCCCGCUCGGGCUGGCGGCCCCGAAUCCGGGCAGUGCU	hsa-miR-4799-3p_MIMAT0019977_Homo_sapiens_miR-4799-3p	ACUGGCAUGCUGCAUUUAUAUA	GCAGUGCU&GGCAUGCUGC	((((((((&)))..)))))	63,70	5,14	-7.92	-9.93	0.62	1.39
		BFRF1_3'_UTR_	97	167	CCGUGGCUCCCGCCUCUUGGAUGCCAUCAUCCCCUGCUUGGGACCCGACCGCACUUGCAUGCGGCCGGUG	hsa-miR-4690-5p_MIMAT0019779_Homo_sapiens_miR-4690-5p	GAGCAGGCGAGGCUGGGCUGAA	GCCUC&GAGGC	(((((&)))))	12,16	10,14	-9.05	-9.9	0.25	0.6
		BFRF1_3'_UTR_	228	298	CCGUUUGCUCCAUCUGUCAGCAACGCCAAGCUCCAGAGGACGCCCGCGACGAGCCUCACCUGUUCUCCUC	hsa-miR-6824-3p_MIMAT0027549_Homo_sapiens_miR-6824-3p	UCUCUGGUCUUGCCACCCCAG	GCAACGCCA&UGGUCUUGC	((((.((((&)))).))))	20,28	6,14	-2.49	-9.87	4.56	2.82
		BFRF1_3'_UTR_	0	70	UGGGCUGCCAGAGGCUGGCUGAGCCACCGAGCGCCCGCUCGGGCUGGCGGCCCCGAAUCCGGGCAGUGCU	hsa-miR-4691-3p_MIMAT0019782_Homo_sapiens_miR-4691-3p	CCAGCCACGGACUGAGAGUGCAU	GGCUG&CAGCC	(((((&)))))	17,21	3,7	-8.73	-9.8	0.07	1
		BFRF1_3'_UTR_	366	436	GCACGCCGGCUGCCCAAGCCCACCCUCCAGGGGAGGCUGGAGGCGGAUUUUCCAGACAGUCCCCUGCUUC	hsa-miR-6877-3p_MIMAT0027655_Homo_sapiens_miR-6877-3p	CAGCCUCUGCCCUUGGCCUCC	GGCGGA&UCUGCC	((((((&))))))	42,47	7,12	-7.94	-9.8	1.79	0.07
		BFRF1_3'_UTR_	91	161	GCUCGACCGUGGCUCCCGCCUCUUGGAUGCCAUCAUCCCCUGCUUGGGACCCGACCGCACUUGCAUGCGG	hsa-miR-1255a_MIMAT0005906_Homo_sapiens_miR-1255a	AGGAUGAGCAAAGAAAGUAGAUU	GCUCGACC&GGAUGAGC	(((((.((&)).)))))	1,8	3,10	-8.54	-9.79	0.93	0.31
		BFRF1_3'_UTR_	77	147	AACGCGGCCUACGAGCUCGACCGUGGCUCCCGCCUCUUGGAUGCCAUCAUCCCCUGCUUGGGACCCGACC	ebv-miR-BART17-5p_MIMAT0003715	UAAGAGGACGCAGGCAUACAAG	CGCCUCUU&AAGAGGACG	((((((((&)))))).))	31,38	3,11	-9.16	-9.7	0.4	0.14
		BFRF1_3'_UTR_	191	261	CAGCUCCUGUAUUUAACUUUGCGGACAGAGGCCAGAGCCGUUUGCUCCAUCUGUCAGCAACGCCAAGCUC	hsa-miR-3194-3p_MIMAT0019218_Homo_sapiens_miR-3194-3p	AGCUCUGCUGCUCACUGGCAGU	CAGAGC&GCUCUG	((((((&))))))	33,38	3,8	-4.5	-9.7	3.94	1.25
		BFRF1_3'_UTR_	353	423	CAGACGCGUUAUGGCACGCCGGCUGCCCAAGCCCACCCUCCAGGGGAGGCUGGAGGCGGAUUUUCCAGAC	hsa-miR-6745_MIMAT0027391_Homo_sapiens_miR-6745	UGGGUGGAAGAAGGUCUGGUU	CCAGAC&GUCUGG	((((((&))))))	65,70	15,20	-8.1	-9.7	0.59	1.01
		BFRF1_3'_UTR_	445	515	AAGAGCUGAACCAGAAUAAUCUCCCCAAUGAUGUUUUUCGGGAGGCUCAAAGAAGUUACCUGGUAUUUCU	hsa-miR-548ac_MIMAT0018938_Homo_sapiens_miR-548ac	CAAAAACCGGCAAUUACUUUUG	AGAAGUUACCUGGU&ACCGGCAAUUACUUUU	.(((((...(((((&))))).....))))).	51,64	7,22	-6.1	-9.68	3.29	0.28
		BFRF1_3'_UTR_	272	342	CGCGACGAGCCUCACCUGUUCUCCUCCUGUUUAGAGGUAGAAUUGCCACCUGGUGAGCGGUGUGCGGGCU	hsa-miR-6800-3p_MIMAT0027501_Homo_sapiens_miR-6800-3p	CACCUCUCCUGGCAUCGCCCC	GGUGAGC&GCAUCGCC	(((((((&)).)))))	52,58	13,20	-4.75	-9.61	2.68	2.18
		BFRF1_3'_UTR_	325	395	UGAGCGGUGUGCGGGCUGCCGUCUCUAUCAGACGCGUUAUGGCACGCCGGCUGCCCAAGCCCACCCUCCA	hsa-miR-523-3p_MIMAT0002840_Homo_sapiens_miR-523-3p	GAACGCGCUUCCCUAUAGAGGGU	AGACGCGUU&AACGCGCU	((.((((((&))))))))	30,38	3,10	-5.81	-9.6	3.71	0.09
		BFRF1_3'_UTR_	384	454	CCCACCCUCCAGGGGAGGCUGGAGGCGGAUUUUCCAGACAGUCCCCUGCUUCCUAAAUUUCAAGAGCUGA	hsa-miR-1299_MIMAT0005887_Homo_sapiens_miR-1299	UUCUGGAAUUCUGUGUGAGGGA	UUCCAGA&UCUGGAA	.((((((&)))))).	32,38	3,9	-8.58	-9.6	0.76	0.26
		BFRF1_3'_UTR_	381	451	AAGCCCACCCUCCAGGGGAGGCUGGAGGCGGAUUUUCCAGACAGUCCCCUGCUUCCUAAAUUUCAAGAGC	hsa-miR-3148_MIMAT0015021_Homo_sapiens_miR-3148	UGGAAAAAACUGGUGUGUGCUU	AAGCCCACCC&GGUGUGUGCUU	(((((((((.&)))).).))))	1,10	13,23	-5.87	-9.51	3.08	0.56
		BFRF1_3'_UTR_	70	140	GCCGCACAACGCGGCCUACGAGCUCGACCGUGGCUCCCGCCUCUUGGAUGCCAUCAUCCCCUGCUUGGGA	hsa-miR-920_MIMAT0004970_Homo_sapiens_miR-920	GGGGAGCUGUGGAAGCAGUA	UCCCC&GGGGA	(((((&)))))	57,61	2,6	-7.89	-9.5	1.61	0
		BFRF1_3'_UTR_	188	258	AGGCAGCUCCUGUAUUUAACUUUGCGGACAGAGGCCAGAGCCGUUUGCUCCAUCUGUCAGCAACGCCAAG	hsa-miR-3176_MIMAT0015053_Homo_sapiens_miR-3176	ACUGGCCUGGGACUACCGG	GGCCA&UGGCC	(((((&)))))	33,37	4,8	-7.38	-9.5	0.43	1.69
		BFRF1_3'_UTR_	188	258	AGGCAGCUCCUGUAUUUAACUUUGCGGACAGAGGCCAGAGCCGUUUGCUCCAUCUGUCAGCAACGCCAAG	hsa-miR-3922-3p_MIMAT0018197_Homo_sapiens_miR-3922-3p	UCUGGCCUUGACUUGACUCUUU	GGCCA&UGGCC	(((((&)))))	33,37	4,8	-8.83	-9.5	0.43	0.24
		BFRF1_3'_UTR_	264	334	AGGACGCCCGCGACGAGCCUCACCUGUUCUCCUCCUGUUUAGAGGUAGAAUUGCCACCUGGUGAGCGGUG	hsa-miR-4700-3p_MIMAT0019797_Homo_sapiens_miR-4700-3p	CACAGGACUGACUCCUCACCCCAGUG	GGUGAG&CUCACC	((((((&))))))	60,65	16,21	-3.23	-9.5	3.97	2.3
		BFRF1_3'_UTR_	0	70	UGGGCUGCCAGAGGCUGGCUGAGCCACCGAGCGCCCGCUCGGGCUGGCGGCCCCGAAUCCGGGCAGUGCU	hsa-miR-6824-3p_MIMAT0027549_Homo_sapiens_miR-6824-3p	UCUCUGGUCUUGCCACCCCAG	GGCAGUGCU&GGUCUUGCC	(((((.(((&))).)))))	62,70	7,15	-5.78	-9.5	0.9	2.82
		BFRF1_3'_UTR_	0	70	UGGGCUGCCAGAGGCUGGCUGAGCCACCGAGCGCCCGCUCGGGCUGGCGGCCCCGAAUCCGGGCAGUGCU	hsa-miR-6849-3p_MIMAT0027599_Homo_sapiens_miR-6849-3p	ACCAGCCUGUGUCCACCUCCAG	GGCUG&CAGCC	(((((&)))))	17,21	4,8	-9.04	-9.5	0.07	0.4
		BFRF1_3'_UTR_	9	79	AGAGGCUGGCUGAGCCACCGAGCGCCCGCUCGGGCUGGCGGCCCCGAAUCCGGGCAGUGCUGCCGCACAA	hsa-miR-6849-3p_MIMAT0027599_Homo_sapiens_miR-6849-3p	ACCAGCCUGUGUCCACCUCCAG	GGCUG&CAGCC	(((((&)))))	8,12	4,8	-9.08	-9.5	0.02	0.4
		BFRF1_3'_UTR_	291	361	UCUCCUCCUGUUUAGAGGUAGAAUUGCCACCUGGUGAGCGGUGUGCGGGCUGCCGUCUCUAUCAGACGCG	hsa-miR-6862-3p_MIMAT0027626_Homo_sapiens_miR-6862-3p	CCUCACCCAGCUCUCUGGCCCUCU	GGUGAG&CUCACC	((((((&))))))	33,38	3,8	-6.74	-9.5	0.96	1.8
		BFRF1_3'_UTR_	187	257	CAGGCAGCUCCUGUAUUUAACUUUGCGGACAGAGGCCAGAGCCGUUUGCUCCAUCUGUCAGCAACGCCAA	hsa-miR-6878-3p_MIMAT0027657_Homo_sapiens_miR-6878-3p	CUGGCCUCUUCUUUCUCCUAG	GGCCA&UGGCC	(((((&)))))	34,38	3,7	-8.85	-9.5	0.43	0.22
		BFRF1_3'_UTR_	445	515	AAGAGCUGAACCAGAAUAAUCUCCCCAAUGAUGUUUUUCGGGAGGCUCAAAGAAGUUACCUGGUAUUUCU	hsa-miR-548bb-3p_MIMAT0035704_Homo_sapiens_miR-548bb-3p	CAAAAACCAUAGUUACUUUUGC	AGAAGUUACCUGGU&ACCAUAGUUACUUUU	.(((((.((.((((&))))..)).))))).	51,64	7,21	-5.69	-9.41	3.29	0.43
		BFRF1_3'_UTR_	361	431	UUAUGGCACGCCGGCUGCCCAAGCCCACCCUCCAGGGGAGGCUGGAGGCGGAUUUUCCAGACAGUCCCCU	hsa-miR-6810-3p_MIMAT0027521_Homo_sapiens_miR-6810-3p	UCCCCUGCUCCCUUGUUCCCCAG	GGGAG&CUCCC	(((((&)))))	36,40	9,13	-5.93	-9.4	3.31	0.16
		BFRF1_3'_UTR_	362	432	UAUGGCACGCCGGCUGCCCAAGCCCACCCUCCAGGGGAGGCUGGAGGCGGAUUUUCCAGACAGUCCCCUG	hsa-miR-6826-3p_MIMAT0027553_Homo_sapiens_miR-6826-3p	CUCCCCUCUCUUUCCUGUUCAG	GGGAG&CUCCC	(((((&)))))	35,39	2,6	-4.85	-9.4	4.55	0
		BFRF1_3'_UTR_	0	70	UGGGCUGCCAGAGGCUGGCUGAGCCACCGAGCGCCCGCUCGGGCUGGCGGCCCCGAAUCCGGGCAGUGCU	hsa-miR-8088_MIMAT0031015_Homo_sapiens_miR-8088	CCUCGGUACUGGAAAGGGGUA	CAGUGCU&GGUACUG	(((((((&)))))))	64,70	6,12	-8.74	-9.4	0.55	0.11
		BFRF1_3'_UTR_	361	431	UUAUGGCACGCCGGCUGCCCAAGCCCACCCUCCAGGGGAGGCUGGAGGCGGAUUUUCCAGACAGUCCCCU	hsa-miR-331-3p_MIMAT0000760_Homo_sapiens_miR-331-3p	GCCCCUGGGCCUAUCCUAGAA	GCCCA&UGGGC	(((((&)))))	17,21	7,11	-4.2	-9.3	0.4	4.71
		BFRF1_3'_UTR_	291	361	UCUCCUCCUGUUUAGAGGUAGAAUUGCCACCUGGUGAGCGGUGUGCGGGCUGCCGUCUCUAUCAGACGCG	hsa-miR-6784-3p_MIMAT0027469_Homo_sapiens_miR-6784-3p	UCUCACCCCAACUCUGCCCCAG	GGUGAG&CUCACC	((((((&))))))	33,38	3,8	-8.33	-9.3	0.96	0.01
		BFRF1_3'_UTR_	406	476	AGGCGGAUUUUCCAGACAGUCCCCUGCUUCCUAAAUUUCAAGAGCUGAACCAGAAUAAUCUCCCCAAUGA	hsa-miR-513a-3p_MIMAT0004777_Homo_sapiens_miR-513a-3p	UAAAUUUCACCUUUCUGAGAAGG	CCUAAAUUUCAAGAGCUGAA&UUCACCUUUCUGAGAAGG	(((...(((((((((.(((.&.))).)))).))))))))	30,49	7,24	-4.17	-9.28	2.13	2.99
		BFRF1_3'_UTR_	433	503	UUCCUAAAUUUCAAGAGCUGAACCAGAAUAAUCUCCCCAAUGAUGUUUUUCGGGAGGCUCAAAGAAGUUA	hsa-miR-939-5p_MIMAT0004982_Homo_sapiens_miR-939-5p	UGGGGAGCUGAGGCUCUGGGGGUG	UCCCC&GGGGG	.((((&)))).	34,38	19,23	-9.03	-9.1	0.04	0.03
		BFRF1_3'_UTR_	361	431	UUAUGGCACGCCGGCUGCCCAAGCCCACCCUCCAGGGGAGGCUGGAGGCGGAUUUUCCAGACAGUCCCCU	hsa-miR-6801-3p_MIMAT0027503_Homo_sapiens_miR-6801-3p	ACCCCUGCCACUCACUGGCC	GGCGG&CUGCC	(((((&)))))	47,51	6,10	-2.89	-9.1	2.12	4.09
		BFRF1_3'_UTR_	174	244	GGGGGGUGACGGUCAGGCAGCUCCUGUAUUUAACUUUGCGGACAGAGGCCAGAGCCGUUUGCUCCAUCUG	hsa-miR-3973_MIMAT0019358_Homo_sapiens_miR-3973	ACAAAGUACAGCAUUAGCCUUAG	GCUCCUGUAUUU&AAGUACAGCAUUAGC	(((.((((((((&))))))))....)))	20,31	5,19	-1.8	-9.07	6.48	0.8
		BFRF1_3'_UTR_	0	70	UGGGCUGCCAGAGGCUGGCUGAGCCACCGAGCGCCCGCUCGGGCUGGCGGCCCCGAAUCCGGGCAGUGCU	hsa-miR-4720-5p_MIMAT0019833_Homo_sapiens_miR-4720-5p	CCUGGCAUAUUUGGUAUAACUU	CGAAUCCGGG&CCUGGCAUAUUUG	((((((((((&)))))...)))))	54,63	2,14	-6.8	-9.06	1.27	1
		BFRF1_3'_UTR_	427	497	CCCUGCUUCCUAAAUUUCAAGAGCUGAACCAGAAUAAUCUCCCCAAUGAUGUUUUUCGGGAGGCUCAAAG	hsa-miR-126-5p_MIMAT0000444_Homo_sapiens_miR-126-5p	CAUUAUUACUUUUGGUACGCG	GCUGAACCAGAA&UUUUGGUACGC	((.(.((((((.&.)))))).)))	23,34	11,21	-4.67	-9.03	3.71	0.65
		BFRF1_3'_UTR_	89	159	GAGCUCGACCGUGGCUCCCGCCUCUUGGAUGCCAUCAUCCCCUGCUUGGGACCCGACCGCACUUGCAUGC	hsa-miR-1322_MIMAT0005953_Homo_sapiens_miR-1322	GAUGAUGCUGCUGAUGCUG	GCACUUGCAUGC&GCUGCUGAUGC	(((...(((.((&)))))...)))	59,70	8,18	-5.07	-9.01	2.45	1.49
		BFRF1_3'_UTR_	22	92	GCCACCGAGCGCCCGCUCGGGCUGGCGGCCCCGAAUCCGGGCAGUGCUGCCGCACAACGCGGCCUACGAG	hsa-miR-4320_MIMAT0016871_Homo_sapiens_miR-4320	GGGAUUCUGUAGCUUCCU	GAAUCC&GGAUUC	((((((&))))))	33,38	3,8	-5.39	-9	0.82	2.79
		BFRF1_3'_UTR_	529	599	GCUACGAAGAGUACGUGCAGAGGACUUUUGGGGUGCCUCGGCGCCAACGCGCCAUAGACAAGAGGCAGAG	hsa-miR-3622a-5p_MIMAT0018003_Homo_sapiens_miR-3622a-5p	CAGGCACGGGAGCUCAGGUGAG	CGUGC&GCACG	(((((&)))))	14,18	5,9	-4.94	-9	2.42	1.63
		BFRF1_3'_UTR_	273	343	GCGACGAGCCUCACCUGUUCUCCUCCUGUUUAGAGGUAGAAUUGCCACCUGGUGAGCGGUGUGCGGGCUG	hsa-miR-4777-3p_MIMAT0019935_Homo_sapiens_miR-4777-3p	AUACCUCAUCUAGAAUGCUGUA	GAGGUA&UACCUC	((((((&))))))	33,38	3,8	-5.14	-9	3.4	0.45
		BFRF1_3'_UTR_	520	590	CCCAGUUCUGCUACGAAGAGUACGUGCAGAGGACUUUUGGGGUGCCUCGGCGCCAACGCGCCAUAGACAA	hsa-miR-548t-5p_MIMAT0015009_Homo_sapiens_miR-548t-5p	CAAAAGUGAUCGUGGUUUUUG	CGAAGAGUACG&CGUGGUUUUUG	((((((.((((&)))).))))))	14,24	12,22	-5.4	-8.92	2.95	0.57
		BFRF1_3'_UTR_	290	360	UUCUCCUCCUGUUUAGAGGUAGAAUUGCCACCUGGUGAGCGGUGUGCGGGCUGCCGUCUCUAUCAGACGC	hsa-miR-197-3p_MIMAT0000227_Homo_sapiens_miR-197-3p	UUCACCACCUUCUCCACCCAGC	UGGUGAG&UUCACCA	((((((.&.))))))	33,39	2,8	-7.89	-8.9	1.01	0
		BFRF1_3'_UTR_	486	556	GAGGCUCAAAGAAGUUACCUGGUAUUUCUGACAUCCCAGUUCUGCUACGAAGAGUACGUGCAGAGGACUU	hsa-miR-450b-3p_MIMAT0004910_Homo_sapiens_miR-450b-3p	UUGGGAUCAUUUUGCAUCCAUA	AUCCCAG&UUGGGAU	((((((.&.))))))	33,39	2,8	-2.9	-8.9	2.4	3.59
		BFRF1_3'_UTR_	431	501	GCUUCCUAAAUUUCAAGAGCUGAACCAGAAUAAUCUCCCCAAUGAUGUUUUUCGGGAGGCUCAAAGAAGU	hsa-miR-4683_MIMAT0019768_Homo_sapiens_miR-4683	UGGAGAUCCAGUGCUCGCCCGAU	UCGGG&CCCGA	(((((&)))))	52,56	19,23	-4.52	-8.9	4.03	0.35
		BFRF1_3'_UTR_	0	70	UGGGCUGCCAGAGGCUGGCUGAGCCACCGAGCGCCCGCUCGGGCUGGCGGCCCCGAAUCCGGGCAGUGCU	hsa-miR-8057_MIMAT0030984_Homo_sapiens_miR-8057	GUGGCUCUGUAGUAAGAUGGA	GCAGUGCU&GGCUCUGU	((((.(((&))).))))	63,70	4,11	-6.67	-8.81	0.62	1.52
		BFRF1_3'_UTR_	195	265	UCCUGUAUUUAACUUUGCGGACAGAGGCCAGAGCCGUUUGCUCCAUCUGUCAGCAACGCCAAGCUCCAGA	hsa-miR-4485-3p_MIMAT0019019_Homo_sapiens_miR-4485-3p	UAACGGCCGCGGUACCCUAA	GGCC&GGCC	((((&))))	26,29	6,9	-7.48	-8.8	0.44	0.88
		BFRF1_3'_UTR_	309	379	UAGAAUUGCCACCUGGUGAGCGGUGUGCGGGCUGCCGUCUCUAUCAGACGCGUUAUGGCACGCCGGCUGC	hsa-miR-548al_MIMAT0019024_Homo_sapiens_miR-548al	AACGGCAAUGACUUUUGUACCA	AUUGCC&GGCAAU	((((((&))))))	5,10	5,10	-4.92	-8.8	1.96	1.92
		BFRF1_3'_UTR_	331	401	GUGUGCGGGCUGCCGUCUCUAUCAGACGCGUUAUGGCACGCCGGCUGCCCAAGCCCACCCUCCAGGGGAG	hsa-miR-5590-5p_MIMAT0022299_Homo_sapiens_miR-5590-5p	UUGCCAUACAUAGACUUUAUU	UAUGGC&GCCAUA	((((((&))))))	32,37	4,9	-7.71	-8.8	1.05	0.04
		BFRF1_3'_UTR_	15	85	UGGCUGAGCCACCGAGCGCCCGCUCGGGCUGGCGGCCCCGAAUCCGGGCAGUGCUGCCGCACAACGCGGC	hsa-miR-6781-5p_MIMAT0027462_Homo_sapiens_miR-6781-5p	CGGGCCGGAGGUCAAGGGCGU	GCCC&GGGC	((((&))))	18,21	17,20	-7.41	-8.8	0.06	1.33
		BFRF1_3'_UTR_	0	70	UGGGCUGCCAGAGGCUGGCUGAGCCACCGAGCGCCCGCUCGGGCUGGCGGCCCCGAAUCCGGGCAGUGCU	hsa-miR-326_MIMAT0000756_Homo_sapiens_miR-326	CCUCUGGGCCCUUCCUCCAG	GGGC&GCCC	((((&))))	61,64	9,12	-6.62	-8.7	1.2	0.88
		BFRF1_3'_UTR_	383	453	GCCCACCCUCCAGGGGAGGCUGGAGGCGGAUUUUCCAGACAGUCCCCUGCUUCCUAAAUUUCAAGAGCUG	hsa-miR-875-3p_MIMAT0004923_Homo_sapiens_miR-875-3p	CCUGGAAACACUGAGGUUGUG	UUCCAG&CUGGAA	.(((((&))))).	33,38	3,8	-7.38	-8.7	0.13	1.19
		BFRF1_3'_UTR_	319	389	ACCUGGUGAGCGGUGUGCGGGCUGCCGUCUCUAUCAGACGCGUUAUGGCACGCCGGCUGCCCAAGCCCAC	hsa-miR-3192-3p_MIMAT0027027_Homo_sapiens_miR-3192-3p	CUCUGAUCGCCCUCUCAGCUC	GGGC&GCCC	((((&))))	19,22	10,13	-7.55	-8.7	1.13	0.02
		BFRF1_3'_UTR_	0	70	UGGGCUGCCAGAGGCUGGCUGAGCCACCGAGCGCCCGCUCGGGCUGGCGGCCCCGAAUCCGGGCAGUGCU	hsa-miR-4284_MIMAT0016915_Homo_sapiens_miR-4284	GGGCUCACAUCACCCCAU	GCCC&GGGC	((((&))))	33,36	2,5	-5.97	-8.7	0	2.73
		BFRF1_3'_UTR_	384	454	CCCACCCUCCAGGGGAGGCUGGAGGCGGAUUUUCCAGACAGUCCCCUGCUUCCUAAAUUUCAAGAGCUGA	hsa-miR-4782-5p_MIMAT0019944_Homo_sapiens_miR-4782-5p	UUCUGGAUAUGAAGACAAUCAA	UCCAGA&UCUGGA	((((((&))))))	33,38	3,8	-7.09	-8.7	0.76	0.85
		BFRF1_3'_UTR_	0	70	UGGGCUGCCAGAGGCUGGCUGAGCCACCGAGCGCCCGCUCGGGCUGGCGGCCCCGAAUCCGGGCAGUGCU	hsa-miR-5685_MIMAT0022475_Homo_sapiens_miR-5685	ACAGCCCAGCAGUUAUCACGGG	GGCUG&CAGCC	(((((&)))))	17,21	3,7	-6.84	-8.7	0.07	1.8
		BFRF1_3'_UTR_	8	78	CAGAGGCUGGCUGAGCCACCGAGCGCCCGCUCGGGCUGGCGGCCCCGAAUCCGGGCAGUGCUGCCGCACA	hsa-miR-5685_MIMAT0022475_Homo_sapiens_miR-5685	ACAGCCCAGCAGUUAUCACGGG	GGCUG&CAGCC	(((((&)))))	9,13	3,7	-6.88	-8.7	0.02	1.8
		BFRF1_3'_UTR_	558	606	GGGGUGCCUCGGCGCCAACGCGCCAUAGACAAGAGGCAGAGAGCCAGU	hsa-miR-6836-3p_MIMAT0027575_Homo_sapiens_miR-6836-3p	AUGCCUCCCCCGGCCCCGCAG	GGGG&CCCC	((((&))))	1,4	9,12	-6.44	-8.5	2.06	0.01
		BFRF1_3'_UTR_	30	100	GCGCCCGCUCGGGCUGGCGGCCCCGAAUCCGGGCAGUGCUGCCGCACAACGCGGCCUACGAGCUCGACCG	hsa-miR-6890-3p_MIMAT0027681_Homo_sapiens_miR-6890-3p	CCACUGCCUAUGCCCCACAG	UGGCGGC&GCCCCA	(((.(((&))))))	15,21	13,18	-6.24	-8.5	2.06	0.2
		BFRF1_3'_UTR_	445	515	AAGAGCUGAACCAGAAUAAUCUCCCCAAUGAUGUUUUUCGGGAGGCUCAAAGAAGUUACCUGGUAUUUCU	hsa-miR-548d-3p_MIMAT0003323_Homo_sapiens_miR-548d-3p	CAAAAACCACAGUUUCUUUUGC	AGAAGUUACCUGGU&ACCACAGUUUCUUUU	.((((..((.((((&))))..))..)))).	51,64	7,21	-4.49	-8.47	3.29	0.69
		BFRF1_3'_UTR_	331	401	GUGUGCGGGCUGCCGUCUCUAUCAGACGCGUUAUGGCACGCCGGCUGCCCAAGCCCACCCUCCAGGGGAG	hsa-miR-4659a-5p_MIMAT0019726_Homo_sapiens_miR-4659a-5p	CUGCCAUGUCUAAGAAGAAAAC	UAUGGC&GCCAUG	((((((&))))))	32,37	4,9	-7.3	-8.4	1.05	0.05
		BFRF1_3'_UTR_	331	401	GUGUGCGGGCUGCCGUCUCUAUCAGACGCGUUAUGGCACGCCGGCUGCCCAAGCCCACCCUCCAGGGGAG	hsa-miR-4659b-5p_MIMAT0019733_Homo_sapiens_miR-4659b-5p	UUGCCAUGUCUAAGAAGAA	UAUGGC&GCCAUG	((((((&))))))	32,37	4,9	-7.33	-8.4	1.05	0.03
		BFRF1_3'_UTR_	186	256	UCAGGCAGCUCCUGUAUUUAACUUUGCGGACAGAGGCCAGAGCCGUUUGCUCCAUCUGUCAGCAACGCCA	hsa-miR-4757-5p_MIMAT0019901_Homo_sapiens_miR-4757-5p	AGGCCUCUGUGACGUCACGGUGU	GGCC&GGCC	((((&))))	35,38	3,6	-7.02	-8.4	0.43	0.95
		BFRF1_3'_UTR_	206	276	ACUUUGCGGACAGAGGCCAGAGCCGUUUGCUCCAUCUGUCAGCAACGCCAAGCUCCAGAGGACGCCCGCG	hsa-miR-1245b-3p_MIMAT0019951_Homo_sapiens_miR-1245b-3p	UCAGAUGAUCUAAAGGCCUAUA	GGCC&GGCC	((((&))))	15,18	16,19	-7.91	-8.4	0.46	0.04
		BFRF1_3'_UTR_	0	70	UGGGCUGCCAGAGGCUGGCUGAGCCACCGAGCGCCCGCUCGGGCUGGCGGCCCCGAAUCCGGGCAGUGCU	hsa-miR-6781-3p_MIMAT0027463_Homo_sapiens_miR-6781-3p	UGCCUCUUUUCCACGGCCUCAG	GGCUG&CGGCC	(((((&)))))	17,21	15,19	-5.9	-8.4	0.07	2.43
		BFRF1_3'_UTR_	185	255	GUCAGGCAGCUCCUGUAUUUAACUUUGCGGACAGAGGCCAGAGCCGUUUGCUCCAUCUGUCAGCAACGCC	hsa-miR-6781-3p_MIMAT0027463_Homo_sapiens_miR-6781-3p	UGCCUCUUUUCCACGGCCUCAG	GGCC&GGCC	((((&))))	36,39	16,19	-5.54	-8.4	0.43	2.43
		BFRF1_3'_UTR_	230	300	GUUUGCUCCAUCUGUCAGCAACGCCAAGCUCCAGAGGACGCCCGCGACGAGCCUCACCUGUUCUCCUCCU	hsa-miR-7111-3p_MIMAT0028120_Homo_sapiens_miR-7111-3p	AUCCUCUCUUCCCUCCUCCCAG	AGAGGA&UCCUCU	((((((&))))))	33,38	3,8	-0.73	-8.4	7.67	0
		BFRF1_3'_UTR_	0	70	UGGGCUGCCAGAGGCUGGCUGAGCCACCGAGCGCCCGCUCGGGCUGGCGGCCCCGAAUCCGGGCAGUGCU	hsa-miR-7150_MIMAT0028211_Homo_sapiens_miR-7150	CUGGCAGGGGGAGAGGUA	CGAAUCCGGGCAG&CUGGCAGGGGGAG	.............&.............	54,66	2,14	-6.66	-8.39	1.27	0.46
		BFRF1_3'_UTR_	190	260	GCAGCUCCUGUAUUUAACUUUGCGGACAGAGGCCAGAGCCGUUUGCUCCAUCUGUCAGCAACGCCAAGCU	hsa-miR-326_MIMAT0000756_Homo_sapiens_miR-326	CCUCUGGGCCCUUCCUCCAG	GGCC&GGCC	((((&))))	31,34	8,11	-4.39	-8.3	0.43	3.48
		BFRF1_3'_UTR_	186	256	UCAGGCAGCUCCUGUAUUUAACUUUGCGGACAGAGGCCAGAGCCGUUUGCUCCAUCUGUCAGCAACGCCA	hsa-miR-6744-3p_MIMAT0027390_Homo_sapiens_miR-6744-3p	GGGCCUCUCUUGUCAUCCUGCAG	GGCC&GGCC	((((&))))	35,38	3,6	-7.07	-8.3	0.43	0.8
		BFRF1_3'_UTR_	515	585	GACAUCCCAGUUCUGCUACGAAGAGUACGUGCAGAGGACUUUUGGGGUGCCUCGGCGCCAACGCGCCAUA	hsa-miR-6881-3p_MIMAT0027663_Homo_sapiens_miR-6881-3p	AUCCUCUUUCGUCCUUCCCACU	ACGAAGAG&CUCUUUCGU	((((((((&))))).)))	18,25	5,13	-5.31	-8.3	2.95	0.04
		BFRF1_3'_UTR_	257	327	GCUCCAGAGGACGCCCGCGACGAGCCUCACCUGUUCUCCUCCUGUUUAGAGGUAGAAUUGCCACCUGGUG	hsa-miR-7153-5p_MIMAT0028216_Homo_sapiens_miR-7153-5p	UGAGAACUGACAAAUGUGGUAGG	UGCCAC&GUGGUA	((((((&))))))	59,64	17,22	-6.19	-8.3	0.76	1.36
		BFRF1_3'_UTR_	406	476	AGGCGGAUUUUCCAGACAGUCCCCUGCUUCCUAAAUUUCAAGAGCUGAACCAGAAUAAUCUCCCCAAUGA	hsa-miR-513c-3p_MIMAT0022728_Homo_sapiens_miR-513c-3p	UAAAUUUCACCUUUCUGAGAAGA	UUUCAAGAGCUGAA&UUCACCUUUCUGAGA	(((((((((.(((.&.))).)))).)))))	36,49	7,21	-4.18	-8.25	2.11	1.96
		BFRF1_3'_UTR_	409	479	CGGAUUUUCCAGACAGUCCCCUGCUUCCUAAAUUUCAAGAGCUGAACCAGAAUAAUCUCCCCAAUGAUGU	hsa-miR-510-3p_MIMAT0026613_Homo_sapiens_miR-510-3p	AUUGAAACCUCUAAGAGUGGA	CUGCUUCCUAAAUUUCAA&UUGAAACCUCUAAGAGUGG	((((((......(((((.&.))))).......))))))	21,38	3,21	-4.66	-8.12	1.99	1.47
		BFRF1_3'_UTR_	227	297	GCCGUUUGCUCCAUCUGUCAGCAACGCCAAGCUCCAGAGGACGCCCGCGACGAGCCUCACCUGUUCUCCU	hsa-miR-516b-5p_MIMAT0002859_Homo_sapiens_miR-516b-5p	AUCUGGAGGUAAGAAGCACUUU	CUGUUCUCC&GGAGGUAAG	((..(((((&)))))..))	61,69	6,14	-5.69	-8.1	0.91	1.5
		BFRF1_3'_UTR_	383	453	GCCCACCCUCCAGGGGAGGCUGGAGGCGGAUUUUCCAGACAGUCCCCUGCUUCCUAAAUUUCAAGAGCUG	hsa-miR-6128_MIMAT0024611_Homo_sapiens_miR-6128	ACUGGAAUUGGAGUCAAAA	UUCCAG&CUGGAA	.(((((&))))).	33,38	3,8	-7.37	-8.1	0.13	0.6
		BFRF1_3'_UTR_	28	98	GAGCGCCCGCUCGGGCUGGCGGCCCCGAAUCCGGGCAGUGCUGCCGCACAACGCGGCCUACGAGCUCGAC	hsa-miR-18a-3p_MIMAT0002891_Homo_sapiens_miR-18a-3p	ACUGCCCUAAGUGCUCCUUCUGG	GGCGG&CUGCC	(((((&)))))	18,22	3,7	-5.22	-8	1.71	1.07
		BFRF1_3'_UTR_	519	589	UCCCAGUUCUGCUACGAAGAGUACGUGCAGAGGACUUUUGGGGUGCCUCGGCGCCAACGCGCCAUAGACA	hsa-miR-6507-3p_MIMAT0025471_Homo_sapiens_miR-6507-3p	CAAAGUCCUUCCUAUUUUUCCC	GGACUU&AAGUCC	((((((&))))))	32,37	4,9	-5.76	-8	2.16	0.09
		BFRF1_3'_UTR_	502	572	ACCUGGUAUUUCUGACAUCCCAGUUCUGCUACGAAGAGUACGUGCAGAGGACUUUUGGGGUGCCUCGGCG	hsa-miR-6515-3p_MIMAT0025487_Homo_sapiens_miR-6515-3p	UCUCUUCAUCUACCCCCCAG	GAAGAG&CUCUUC	((((((&))))))	33,38	3,8	-5.74	-8	2.26	0
		BFRF1_3'_UTR_	520	590	CCCAGUUCUGCUACGAAGAGUACGUGCAGAGGACUUUUGGGGUGCCUCGGCGCCAACGCGCCAUAGACAA	hsa-miR-548az-5p_MIMAT0025456_Homo_sapiens_miR-548az-5p	CAAAAGUGAUUGUGGUUUUUGC	CGAAGAGUAC&GUGGUUUUUG	((((((.(((&))).))))))	14,23	13,22	-4.14	-7.92	2.95	0.83
		BFRF1_3'_UTR_	502	572	ACCUGGUAUUUCUGACAUCCCAGUUCUGCUACGAAGAGUACGUGCAGAGGACUUUUGGGGUGCCUCGGCG	hsa-miR-1236-3p_MIMAT0005591_Homo_sapiens_miR-1236-3p	CCUCUUCCCCUUGUCUCUCCAG	GAAGAG&CUCUUC	((((((&))))))	33,38	3,8	-5.63	-7.9	2.26	0.01
		BFRF1_3'_UTR_	162	232	CGGUGGUCCUGCGGGGGGUGACGGUCAGGCAGCUCCUGUAUUUAACUUUGCGGACAGAGGCCAGAGCCGU	hsa-miR-4459_MIMAT0018981_Homo_sapiens_miR-4459	CCAGGAGGCGGAGGAGGUGGAG	CUUUGC&GCGGAG	((((((&))))))	46,51	9,14	-5.55	-7.81	1.59	0.66
		BFRF1_3'_UTR_	393	463	CAGGGGAGGCUGGAGGCGGAUUUUCCAGACAGUCCCCUGCUUCCUAAAUUUCAAGAGCUGAACCAGAAUA	hsa-miR-6783-5p_MIMAT0027466_Homo_sapiens_miR-6783-5p	UAGGGGAAAAGUCCUGAUCCGG	CGGAUU&GAUCCG	((((((&))))))	17,22	17,22	-6.67	-7.8	0.66	0.47
		BFRF1_3'_UTR_	550	606	GGACUUUUGGGGUGCCUCGGCGCCAACGCGCCAUAGACAAGAGGCAGAGAGCCAGU	hsa-miR-4796-5p_MIMAT0019970_Homo_sapiens_miR-4796-5p	UGUCUAUACUCUGUCACUUUAC	AUAGACA&UGUCUAU	(((((((&)))))))	33,39	2,8	-7.41	-7.7	0	0.29
		BFRF1_3'_UTR_	394	464	AGGGGAGGCUGGAGGCGGAUUUUCCAGACAGUCCCCUGCUUCCUAAAUUUCAAGAGCUGAACCAGAAUAA	hsa-miR-6798-5p_MIMAT0027496_Homo_sapiens_miR-6798-5p	CCAGGGGGAUGGGCGAGCUUGGG	GCUUCCU&GGGAUGGGC	(((((((&))))..)))	38,44	7,15	-6.42	-7.67	1.03	0.22
		BFRF1_3'_UTR_	93	163	UCGACCGUGGCUCCCGCCUCUUGGAUGCCAUCAUCCCCUGCUUGGGACCCGACCGCACUUGCAUGCGGCC	ebv-miR-BART6-3p_MIMAT0003415	CGGGGAUCGGACUAGCCUUAGA	CCCG&CGGG	((((&))))	48,51	2,5	-5.28	-7.6	1.03	1.29
		BFRF1_3'_UTR_	395	465	GGGGAGGCUGGAGGCGGAUUUUCCAGACAGUCCCCUGCUUCCUAAAUUUCAAGAGCUGAACCAGAAUAAU	hsa-miR-6836-5p_MIMAT0027574_Homo_sapiens_miR-6836-5p	CGCAGGGCCCUGGCGCAGGCAU	UGAACCAG&CUGGCGCA	((..((((&))))..))	57,64	11,18	-5.55	-7.6	0.49	1.56
		BFRF1_3'_UTR_	432	502	CUUCCUAAAUUUCAAGAGCUGAACCAGAAUAAUCUCCCCAAUGAUGUUUUUCGGGAGGCUCAAAGAAGUU	hsa-miR-6878-5p_MIMAT0027656_Homo_sapiens_miR-6878-5p	AGGGAGAAAGCUAGAAGCUGAAG	CUUCCU&AGGGAG	((((((&))))))	1,6	2,7	-7.59	-7.6	0	0.01
		BFRF1_3'_UTR_	563	606	GCCUCGGCGCCAACGCGCCAUAGACAAGAGGCAGAGAGCCAGU	hsa-miR-7110-3p_MIMAT0028118_Homo_sapiens_miR-7110-3p	UCUCUCUCCCACUUCCCUGCAG	AGAGAG&CUCUCU	((((((&))))))	33,38	3,8	-7.57	-7.6	0.03	0.01
		BFRF1_3'_UTR_	515	585	GACAUCCCAGUUCUGCUACGAAGAGUACGUGCAGAGGACUUUUGGGGUGCCUCGGCGCCAACGCGCCAUA	hsa-miR-7111-3p_MIMAT0028120_Homo_sapiens_miR-7111-3p	AUCCUCUCUUCCCUCCUCCCAG	GAAGAG&CUCUUC	((((((&))))))	20,25	7,12	-5.34	-7.6	2.26	0
		BFRF1_3'_UTR_	257	327	GCUCCAGAGGACGCCCGCGACGAGCCUCACCUGUUCUCCUCCUGUUUAGAGGUAGAAUUGCCACCUGGUG	hsa-miR-146a-5p_MIMAT0000449_Homo_sapiens_miR-146a-5p	UGAGAACUGAAUUCCAUGGGUU	GCCCGCG&CAUGGGU	.......&.......	13,19	16,22	-3.82	-7.51	2.53	1.15
		BFRF1_3'_UTR_	115	185	GGAUGCCAUCAUCCCCUGCUUGGGACCCGACCGCACUUGCAUGCGGCCGGUGGUCCUGCGGGGGGUGACG	hsa-miR-519c-3p_MIMAT0002832_Homo_sapiens_miR-519c-3p	AAAGUGCAUCUUUUUAGAGGAU	GGAUGC&GCAUCU	((((((&))))))	1,6	7,12	-5.18	-7.4	0.25	1.98
		BFRF1_3'_UTR_	309	379	UAGAAUUGCCACCUGGUGAGCGGUGUGCGGGCUGCCGUCUCUAUCAGACGCGUUAUGGCACGCCGGCUGC	hsa-miR-4445-3p_MIMAT0018964_Homo_sapiens_miR-4445-3p	CACGGCAAAAGAAACAAUCCA	UUGCC&GGCAA	.((((&)))).	6,10	5,9	-5.37	-7.4	1.96	0.08
		BFRF1_3'_UTR_	86	156	UACGAGCUCGACCGUGGCUCCCGCCUCUUGGAUGCCAUCAUCCCCUGCUUGGGACCCGACCGCACUUGCA	hsa-miR-183-5p_MIMAT0000261_Homo_sapiens_miR-183-5p	UAUGGCACUGGUAGAAUUCACU	GCCAU&AUGGC	(((((&)))))	34,38	3,7	-5.11	-7.3	2.08	0.12
		BFRF1_3'_UTR_	432	502	CUUCCUAAAUUUCAAGAGCUGAACCAGAAUAAUCUCCCCAAUGAUGUUUUUCGGGAGGCUCAAAGAAGUU	hsa-miR-6731-5p_MIMAT0027363_Homo_sapiens_miR-6731-5p	UGGGAGAGCAGGGUAUUGUGGA	UCCCCA&UGGGAGA	......&.......	35,40	2,8	-7.2	-7.3	0.04	0.06
		BFRF1_3'_UTR_	96	166	ACCGUGGCUCCCGCCUCUUGGAUGCCAUCAUCCCCUGCUUGGGACCCGACCGCACUUGCAUGCGGCCGGU	hsa-miR-6836-5p_MIMAT0027574_Homo_sapiens_miR-6836-5p	CGCAGGGCCCUGGCGCAGGCAU	CUUGC&GCAGG	(((((&)))))	55,59	3,7	-6.22	-7.2	0	0.98
		BFRF1_3'_UTR_	97	167	CCGUGGCUCCCGCCUCUUGGAUGCCAUCAUCCCCUGCUUGGGACCCGACCGCACUUGCAUGCGGCCGGUG	ebv-miR-BART20-5p_MIMAT0003719	UAGCAGGCAUGUCUUCAUUCC	CUGCU&AGCAG	(((((&)))))	34,38	3,7	-5.2	-7.1	0.44	1.46
		BFRF1_3'_UTR_	365	435	GGCACGCCGGCUGCCCAAGCCCACCCUCCAGGGGAGGCUGGAGGCGGAUUUUCCAGACAGUCCCCUGCUU	hsa-miR-6829-3p_MIMAT0027559_Homo_sapiens_miR-6829-3p	UGCCUCCUCCGUGGCCUCAG	GCGGA&UCCGU	(((((&)))))	44,48	9,13	-6.12	-7.1	0.87	0.11
		BFRF1_3'_UTR_	372	442	CGGCUGCCCAAGCCCACCCUCCAGGGGAGGCUGGAGGCGGAUUUUCCAGACAGUCCCCUGCUUCCUAAAU	hsa-miR-6829-3p_MIMAT0027559_Homo_sapiens_miR-6829-3p	UGCCUCCUCCGUGGCCUCAG	GCGGA&UCCGU	(((((&)))))	37,41	9,13	-6.24	-7.1	0.75	0.11
		BFRF1_3'_UTR_	520	590	CCCAGUUCUGCUACGAAGAGUACGUGCAGAGGACUUUUGGGGUGCCUCGGCGCCAACGCGCCAUAGACAA	hsa-miR-548n_MIMAT0005916_Homo_sapiens_miR-548n	CAAAAGUAAUUGUGGAUUUUGU	ACUUUUG&CAAAAGU	(((((((&)))))))	33,39	2,8	-3.16	-7	3.09	0.75
		BFRF1_3'_UTR_	115	185	GGAUGCCAUCAUCCCCUGCUUGGGACCCGACCGCACUUGCAUGCGGCCGGUGGUCCUGCGGGGGGUGACG	hsa-miR-302a-3p_MIMAT0000684_Homo_sapiens_miR-302a-3p	UAAGUGCUUCCAUGUUUUGGUGA	GGAUGCC&GUGCUUCC	.......&........	1,7	5,12	-4.5	-6.94	0.42	2.02
		BFRF1_3'_UTR_	115	185	GGAUGCCAUCAUCCCCUGCUUGGGACCCGACCGCACUUGCAUGCGGCCGGUGGUCCUGCGGGGGGUGACG	hsa-miR-302b-3p_MIMAT0000715_Homo_sapiens_miR-302b-3p	UAAGUGCUUCCAUGUUUUAGUAG	GGAUGCC&GUGCUUCC	.......&........	1,7	5,12	-5.64	-6.94	0.42	0.87
		BFRF1_3'_UTR_	115	185	GGAUGCCAUCAUCCCCUGCUUGGGACCCGACCGCACUUGCAUGCGGCCGGUGGUCCUGCGGGGGGUGACG	hsa-miR-302c-3p_MIMAT0000717_Homo_sapiens_miR-302c-3p	UAAGUGCUUCCAUGUUUCAGUGG	GGAUGCC&GUGCUUCC	.......&........	1,7	5,12	-4.06	-6.94	0.42	2.46
		BFRF1_3'_UTR_	115	185	GGAUGCCAUCAUCCCCUGCUUGGGACCCGACCGCACUUGCAUGCGGCCGGUGGUCCUGCGGGGGGUGACG	hsa-miR-302d-3p_MIMAT0000718_Homo_sapiens_miR-302d-3p	UAAGUGCUUCCAUGUUUGAGUGU	GGAUGCC&GUGCUUCC	.......&........	1,7	5,12	-5.14	-6.94	0.42	1.38
		BFRF1_3'_UTR_	445	515	AAGAGCUGAACCAGAAUAAUCUCCCCAAUGAUGUUUUUCGGGAGGCUCAAAGAAGUUACCUGGUAUUUCU	hsa-miR-548ah-3p_MIMAT0020957_Homo_sapiens_miR-548ah-3p	CAAAAACUGCAGUUACUUUUGC	AGAAGUUACCUG&CAGUUACUUUU	............&...........	51,62	11,21	-1.75	-6.91	3.29	1.87
		BFRF1_3'_UTR_	445	515	AAGAGCUGAACCAGAAUAAUCUCCCCAAUGAUGUUUUUCGGGAGGCUCAAAGAAGUUACCUGGUAUUUCU	hsa-miR-548am-3p_MIMAT0019076_Homo_sapiens_miR-548am-3p	CAAAAACUGCAGUUACUUUUGU	AGAAGUUACCUG&CAGUUACUUUU	............&...........	51,62	11,21	-2.6	-6.91	3.29	1.02
		BFRF1_3'_UTR_	0	70	UGGGCUGCCAGAGGCUGGCUGAGCCACCGAGCGCCCGCUCGGGCUGGCGGCCCCGAAUCCGGGCAGUGCU	hsa-miR-575_MIMAT0003240_Homo_sapiens_miR-575	GAGCCAGUUGGACAGGAGC	GGCU&AGCC	((((&))))	17,20	3,6	-5.59	-6.9	0.07	1.25
		BFRF1_3'_UTR_	0	70	UGGGCUGCCAGAGGCUGGCUGAGCCACCGAGCGCCCGCUCGGGCUGGCGGCCCCGAAUCCGGGCAGUGCU	hsa-miR-4676-5p_MIMAT0019758_Homo_sapiens_miR-4676-5p	GAGCCAGUGGUGAGACAGUGA	GGCU&AGCC	((((&))))	17,20	3,6	-4.13	-6.9	0.07	2.7
		BFRF1_3'_UTR_	230	300	GUUUGCUCCAUCUGUCAGCAACGCCAAGCUCCAGAGGACGCCCGCGACGAGCCUCACCUGUUCUCCUCCU	hsa-miR-6881-3p_MIMAT0027663_Homo_sapiens_miR-6881-3p	AUCCUCUUUCGUCCUUCCCACU	GACGA&UCGUC	(((((&)))))	46,50	10,14	-4.51	-6.9	2.35	0.03
		BFRF1_3'_UTR_	439	509	AAUUUCAAGAGCUGAACCAGAAUAAUCUCCCCAAUGAUGUUUUUCGGGAGGCUCAAAGAAGUUACCUGGU	hsa-miR-382-3p_MIMAT0022697_Homo_sapiens_miR-382-3p	AAUCAUUCACGGACAACACUU	UCCCCAAUGAU&AUCAUUCACGGA	(((..((((((&))))))...)))	28,38	3,14	-2.87	-6.83	3.82	0.13
		BFRF1_3'_UTR_	441	511	UUUCAAGAGCUGAACCAGAAUAAUCUCCCCAAUGAUGUUUUUCGGGAGGCUCAAAGAAGUUACCUGGUAU	hsa-miR-499a-3p_MIMAT0004772_Homo_sapiens_miR-499a-3p	AACAUCACAGCAAGUCUGUGCU	UGAUGUU&AACAUCA	(((((((&)))))))	33,39	2,8	-3.97	-6.8	1.48	1.36
		BFRF1_3'_UTR_	441	511	UUUCAAGAGCUGAACCAGAAUAAUCUCCCCAAUGAUGUUUUUCGGGAGGCUCAAAGAAGUUACCUGGUAU	hsa-miR-499b-3p_MIMAT0019898_Homo_sapiens_miR-499b-3p	AACAUCACUGCAAGUCUUAACA	UGAUGUU&AACAUCA	(((((((&)))))))	33,39	2,8	-5.23	-6.8	1.48	0.1
		BFRF1_3'_UTR_	0	70	UGGGCUGCCAGAGGCUGGCUGAGCCACCGAGCGCCCGCUCGGGCUGGCGGCCCCGAAUCCGGGCAGUGCU	hsa-miR-6868-5p_MIMAT0027636_Homo_sapiens_miR-6868-5p	ACUGGCAGAACACUGAAGCAGC	CAGUG&CACUG	(((((&)))))	64,68	12,16	-4.54	-6.8	0.49	1.78
		BFRF1_3'_UTR_	115	185	GGAUGCCAUCAUCCCCUGCUUGGGACCCGACCGCACUUGCAUGCGGCCGGUGGUCCUGCGGGGGGUGACG	hsa-miR-302e_MIMAT0005931_Homo_sapiens_miR-302e	UAAGUGCUUCCAUGCUU	GGAUGC&GCUUCC	(((.((&)).)))	1,6	7,12	-5.53	-6.74	0.25	0.96
		BFRF1_3'_UTR_	286	356	CCUGUUCUCCUCCUGUUUAGAGGUAGAAUUGCCACCUGGUGAGCGGUGUGCGGGCUGCCGUCUCUAUCAG	hsa-miR-3934-5p_MIMAT0018349_Homo_sapiens_miR-3934-5p	UCAGGUGUGGAAACUGAGGCAG	UGCC&GGCA	((((&))))	30,33	19,22	-6.35	-6.7	0.32	0.03
		BFRF1_3'_UTR_	164	234	GUGGUCCUGCGGGGGGUGACGGUCAGGCAGCUCCUGUAUUUAACUUUGCGGACAGAGGCCAGAGCCGUUU	hsa-miR-5095_MIMAT0020600_Homo_sapiens_miR-5095	UUACAGGCGUGAACCACCGCG	GUGGU&ACCAC	(((((&)))))	1,5	14,18	-5.33	-6.7	0.98	0.39
		BFRF1_3'_UTR_	405	475	GAGGCGGAUUUUCCAGACAGUCCCCUGCUUCCUAAAUUUCAAGAGCUGAACCAGAAUAAUCUCCCCAAUG	hsa-miR-32-3p_MIMAT0004505_Homo_sapiens_miR-32-3p	CAAUUUAGUGUGUGUGAUAUUU	AUUUCAAGAGCUGAA&UUUAGUGUGUGUGAU	(((.((...(((((.&.)))))...)).)))	36,50	5,19	-4.23	-6.63	1.63	0.77
		BFRF1_3'_UTR_	135	205	UGGGACCCGACCGCACUUGCAUGCGGCCGGUGGUCCUGCGGGGGGUGACGGUCAGGCAGCUCCUGUAUUU	hsa-miR-4436a_MIMAT0018952_Homo_sapiens_miR-4436a	GCAGGACAGGCAGAAGUGGAU	CUUGC&GCAGG	(((((&)))))	16,20	2,6	-6.22	-6.6	0	0.38
		BFRF1_3'_UTR_	136	206	GGGACCCGACCGCACUUGCAUGCGGCCGGUGGUCCUGCGGGGGGUGACGGUCAGGCAGCUCCUGUAUUUA	hsa-miR-4722-5p_MIMAT0019836_Homo_sapiens_miR-4722-5p	GGCAGGAGGGCUGUGCCAGGUUG	CUUGC&GCAGG	(((((&)))))	15,19	3,7	-3.43	-6.6	0	3.16
		BFRF1_3'_UTR_	395	465	GGGGAGGCUGGAGGCGGAUUUUCCAGACAGUCCCCUGCUUCCUAAAUUUCAAGAGCUGAACCAGAAUAAU	hsa-miR-1909-3p_MIMAT0007883_Homo_sapiens_miR-1909-3p	CGCAGGGGCCGGGUGCUCACCG	GAGC&GCUC	((((&))))	53,56	16,19	-5.25	-6.5	0.49	0.77
		BFRF1_3'_UTR_	288	358	UGUUCUCCUCCUGUUUAGAGGUAGAAUUGCCACCUGGUGAGCGGUGUGCGGGCUGCCGUCUCUAUCAGAC	hsa-miR-1911-3p_MIMAT0007886_Homo_sapiens_miR-1911-3p	CACCAGGCAUUGUGGUCUCC	UGCC&GGCA	((((&))))	28,31	7,10	-6.02	-6.5	0.08	0.4
		BFRF1_3'_UTR_	529	599	GCUACGAAGAGUACGUGCAGAGGACUUUUGGGGUGCCUCGGCGCCAACGCGCCAUAGACAAGAGGCAGAG	hsa-miR-5582-5p_MIMAT0022279_Homo_sapiens_miR-5582-5p	UAGGCACACUUAAAGUUAUAGC	GUGC&GCAC	((((&))))	15,18	5,8	-5.71	-6.5	0.43	0.36
		BFRF1_3'_UTR_	115	185	GGAUGCCAUCAUCCCCUGCUUGGGACCCGACCGCACUUGCAUGCGGCCGGUGGUCCUGCGGGGGGUGACG	hsa-miR-520b_MIMAT0002843_Homo_sapiens_miR-520b	AAAGUGCUUCCUUUUAGAGGG	GGAUGCC&GUGCUUCC	.......&........	1,7	5,12	-3.06	-6.44	0.42	2.96
		BFRF1_3'_UTR_	258	328	CUCCAGAGGACGCCCGCGACGAGCCUCACCUGUUCUCCUCCUGUUUAGAGGUAGAAUUGCCACCUGGUGA	hsa-miR-4434_MIMAT0018950_Homo_sapiens_miR-4434	AGGAGAAGUAAAGUAGAA	CUCC&GGAG	((((&))))	1,4	3,6	-4.95	-6.3	1.34	0
		BFRF1_3'_UTR_	483	553	CGGGAGGCUCAAAGAAGUUACCUGGUAUUUCUGACAUCCCAGUUCUGCUACGAAGAGUACGUGCAGAGGA	hsa-miR-219b-5p_MIMAT0019747_Homo_sapiens_miR-219b-5p	AGAUGUCCAGCCACAAUUCUCG	GGCU&AGCC	((((&))))	6,9	10,13	-5.15	-6.3	1.12	0.03
		BFRF1_3'_UTR_	115	185	GGAUGCCAUCAUCCCCUGCUUGGGACCCGACCGCACUUGCAUGCGGCCGGUGGUCCUGCGGGGGGUGACG	hsa-miR-520e_MIMAT0002825_Homo_sapiens_miR-520e	AAAGUGCUUCCUUUUUGAGGG	GGAUGC&GCUUCC	(((.((&)).)))	1,6	7,12	-3.13	-6.24	0.25	2.86
		BFRF1_3'_UTR_	460	530	AUAAUCUCCCCAAUGAUGUUUUUCGGGAGGCUCAAAGAAGUUACCUGGUAUUUCUGACAUCCCAGUUCUG	hsa-miR-6844_MIMAT0027589_Homo_sapiens_miR-6844	UUCUUUGUUUUUAAUUCACAG	CAAAGAA&UUCUUUG	((((((.&.))))))	33,39	2,8	-4.67	-6.2	1.38	0.15
		BFRF1_3'_UTR_	0	70	UGGGCUGCCAGAGGCUGGCUGAGCCACCGAGCGCCCGCUCGGGCUGGCGGCCCCGAAUCCGGGCAGUGCU	hsa-miR-330-5p_MIMAT0004693_Homo_sapiens_miR-330-5p	UCUCUGGGCCUGUGUCUUAGGC	CCGGG&UCUGG	((((.&.))))	59,63	4,8	-4.63	-5.9	1.22	0.06
		BFRF1_3'_UTR_	315	385	UGCCACCUGGUGAGCGGUGUGCGGGCUGCCGUCUCUAUCAGACGCGUUAUGGCACGCCGGCUGCCCAAGC	hsa-miR-3976_MIMAT0019361_Homo_sapiens_miR-3976	UAUAGAGAGCAGGAAGAUUAAUGU	CUGC&GCAG	((((&))))	26,29	10,13	-3.8	-5.9	1.86	0.24
		BFRF1_3'_UTR_	0	70	UGGGCUGCCAGAGGCUGGCUGAGCCACCGAGCGCCCGCUCGGGCUGGCGGCCCCGAAUCCGGGCAGUGCU	hsa-miR-6764-3p_MIMAT0027429_Homo_sapiens_miR-6764-3p	UCUCUGGUCUUUCCUUGACAG	GAAUCCGGG&UCUGGUCUUUC	.........&...........	55,63	4,14	-2.2	-5.9	1.25	2.44
		BFRF1_3'_UTR_	406	476	AGGCGGAUUUUCCAGACAGUCCCCUGCUUCCUAAAUUUCAAGAGCUGAACCAGAAUAAUCUCCCCAAUGA	hsa-miR-3606-3p_MIMAT0022965_Homo_sapiens_miR-3606-3p	AAAAUUUCUUUCACUACUUAG	AAGAGCUGAACCAGAA&UUCUUUCACUACUU	(((((.((((..(((.&.))))))))).)))	40,55	7,20	-3.49	-5.87	2.35	0.03
		BFRF1_3'_UTR_	115	185	GGAUGCCAUCAUCCCCUGCUUGGGACCCGACCGCACUUGCAUGCGGCCGGUGGUCCUGCGGGGGGUGACG	hsa-miR-520a-3p_MIMAT0002834_Homo_sapiens_miR-520a-3p	AAAGUGCUUCCCUUUGGACUGU	GGAUGC&GCUUCC	(((.((&)).)))	1,6	7,12	-3	-5.84	0.25	2.59
		BFRF1_3'_UTR_	174	244	GGGGGGUGACGGUCAGGCAGCUCCUGUAUUUAACUUUGCGGACAGAGGCCAGAGCCGUUUGCUCCAUCUG	hsa-miR-520g-3p_MIMAT0002858_Homo_sapiens_miR-520g-3p	ACAAAGUGCUUCCCUUUAGAGUGU	ACUUUG&CAAAGU	((((((&))))))	33,38	3,8	-1.77	-5.8	3.77	0.27
		BFRF1_3'_UTR_	199	269	GUAUUUAACUUUGCGGACAGAGGCCAGAGCCGUUUGCUCCAUCUGUCAGCAACGCCAAGCUCCAGAGGAC	hsa-miR-548p_MIMAT0005934_Homo_sapiens_miR-548p	UAGCAAAAACUGCAGUUACUUU	AGCUCCAG&CUGCAGUU	.(((.(((&))).))).	58,65	11,18	-2.63	-5.73	1.18	1.93
		BFRF1_3'_UTR_	196	266	CCUGUAUUUAACUUUGCGGACAGAGGCCAGAGCCGUUUGCUCCAUCUGUCAGCAACGCCAAGCUCCAGAG	hsa-miR-553_MIMAT0003216_Homo_sapiens_miR-553	AAAACGGUGAGAUUUUGUUUU	CGCC&GGUG	((((&))))	56,59	7,10	-3.69	-5.7	0.45	1.56
		BFRF1_3'_UTR_	445	515	AAGAGCUGAACCAGAAUAAUCUCCCCAAUGAUGUUUUUCGGGAGGCUCAAAGAAGUUACCUGGUAUUUCU	hsa-miR-548j-3p_MIMAT0026737_Homo_sapiens_miR-548j-3p	CAAAAACUGCAUUACUUUUGC	AGAAGUUACCUGGU&ACUGCAUUACUUUU	.(((((.....(((&))).....))))).	51,64	7,20	-1.32	-5.6	3.29	0.98
		BFRF1_3'_UTR_	359	429	CGUUAUGGCACGCCGGCUGCCCAAGCCCACCCUCCAGGGGAGGCUGGAGGCGGAUUUUCCAGACAGUCCC	hsa-miR-3690_MIMAT0018119_Homo_sapiens_miR-3690	ACCUGGACCCAGCGUAGACAAAG	GUCC&GGAC	((((&))))	66,69	6,9	-3.46	-5.6	0.06	2.08
		BFRF1_3'_UTR_	311	381	GAAUUGCCACCUGGUGAGCGGUGUGCGGGCUGCCGUCUCUAUCAGACGCGUUAUGGCACGCCGGCUGCCC	hsa-miR-483-5p_MIMAT0004761_Homo_sapiens_miR-483-5p	AAGACGGGAGGAAAGAAGGGAG	CCACCU&GGGAGG	((.(((&))).))	7,12	7,12	-5.08	-5.3	0.17	0.05
		BFRF1_3'_UTR_	257	327	GCUCCAGAGGACGCCCGCGACGAGCCUCACCUGUUCUCCUCCUGUUUAGAGGUAGAAUUGCCACCUGGUG	hsa-miR-146b-5p_MIMAT0002809_Homo_sapiens_miR-146b-5p	UGAGAACUGAAUUCCAUAGGCU	GCC&GGC	(((&)))	60,62	20,22	-4.56	-5.3	0.65	0.1
		BFRF1_3'_UTR_	78	148	ACGCGGCCUACGAGCUCGACCGUGGCUCCCGCCUCUUGGAUGCCAUCAUCCCCUGCUUGGGACCCGACCG	hsa-miR-335-5p_MIMAT0000765_Homo_sapiens_miR-335-5p	UCAAGAGCAAUAACGAAAAAUGU	GCCUCUU&AAGAGC	.......&......	31,37	4,9	-4.9	-5.23	0.26	0.07
		BFRF1_3'_UTR_	359	429	CGUUAUGGCACGCCGGCUGCCCAAGCCCACCCUCCAGGGGAGGCUGGAGGCGGAUUUUCCAGACAGUCCC	hsa-miR-4254_MIMAT0016884_Homo_sapiens_miR-4254	GCCUGGAGCUACUCCACCAUCUC	GGC&GCC	(((&)))	7,9	2,4	-2.61	-5.2	2.55	0.04
		BFRF1_3'_UTR_	115	185	GGAUGCCAUCAUCCCCUGCUUGGGACCCGACCGCACUUGCAUGCGGCCGGUGGUCCUGCGGGGGGUGACG	hsa-miR-373-3p_MIMAT0000726_Homo_sapiens_miR-373-3p	GAAGUGCUUCGAUUUUGGGGUGU	AUGCCA&UGGGGU	((.(((&))).))	3,8	17,22	-1.33	-5.1	0.41	3.36
		BFRF1_3'_UTR_	0	70	UGGGCUGCCAGAGGCUGGCUGAGCCACCGAGCGCCCGCUCGGGCUGGCGGCCCCGAAUCCGGGCAGUGCU	hsa-miR-3128_MIMAT0014991_Homo_sapiens_miR-3128	UCUGGCAAGUAAAAAACUCUCAU	GCC&GGC	(((&)))	33,35	5,7	-4.62	-4.9	0	0.28
		BFRF1_3'_UTR_	445	515	AAGAGCUGAACCAGAAUAAUCUCCCCAAUGAUGUUUUUCGGGAGGCUCAAAGAAGUUACCUGGUAUUUCU	hsa-miR-548aj-3p_MIMAT0018990_Homo_sapiens_miR-548aj-3p	UAAAAACUGCAAUUACUUUUA	AGAAGUUACCUGGU&ACUGCAAUUACUUUU	..............&...............	51,64	7,21	-1.44	-4.79	3.29	0.06
		BFRF1_3'_UTR_	556	606	UUGGGGUGCCUCGGCGCCAACGCGCCAUAGACAAGAGGCAGAGAGCCAGU	hsa-miR-877-3p_MIMAT0004950_Homo_sapiens_miR-877-3p	UCCUCUUCUCCCUCCUCCCAG	GAGAG&CUCUU	(((((&)))))	41,45	4,8	-4.69	-4.7	0.01	0
		BFRF1_3'_UTR_	375	445	CUGCCCAAGCCCACCCUCCAGGGGAGGCUGGAGGCGGAUUUUCCAGACAGUCCCCUGCUUCCUAAAUUUC	hsa-miR-6084_MIMAT0023709_Homo_sapiens_miR-6084	UUCCGCCAGUCGGUGGCCGG	CCAGAC&GUCGG	((.(((&)))))	43,48	10,14	-3.93	-4.61	0.19	0.48
		BFRF1_3'_UTR_	33	103	CCCGCUCGGGCUGGCGGCCCCGAAUCCGGGCAGUGCUGCCGCACAACGCGGCCUACGAGCUCGACCGUGG	hsa-miR-3065-3p_MIMAT0015378_Homo_sapiens_miR-3065-3p	UCAGCACCAGGAUAUUGUUGGAG	AUCC&GGAU	((((&))))	24,27	11,14	-3.74	-4.6	0.63	0.23
		BFRF1_3'_UTR_	420	490	GACAGUCCCCUGCUUCCUAAAUUUCAAGAGCUGAACCAGAAUAAUCUCCCCAAUGAUGUUUUUCGGGAGG	hsa-miR-218-1-3p_MIMAT0004565_Homo_sapiens_miR-218-1-3p	AUGGUUCCGUCAAGCACCAUGG	UGAUG&CGUCA	(((((&)))))	54,58	9,13	-4.07	-4.5	0.27	0.16
		BFRF1_3'_UTR_	0	70	UGGGCUGCCAGAGGCUGGCUGAGCCACCGAGCGCCCGCUCGGGCUGGCGGCCCCGAAUCCGGGCAGUGCU	hsa-miR-3194-5p_MIMAT0015078_Homo_sapiens_miR-3194-5p	GGCCAGCCACCAGGAGGGCUG	GCC&GGC	(((&)))	33,35	2,4	-2.9	-4.5	0	1.6
		BFRF1_3'_UTR_	517	587	CAUCCCAGUUCUGCUACGAAGAGUACGUGCAGAGGACUUUUGGGGUGCCUCGGCGCCAACGCGCCAUAGA	hsa-miR-6838-3p_MIMAT0027579_Homo_sapiens_miR-6838-3p	AAGUCCUGCUUCUGUUGCAG	GACUU&AAGUC	(((((&)))))	35,39	2,6	-4.3	-4.5	0.2	0
		BFRF1_3'_UTR_	115	185	GGAUGCCAUCAUCCCCUGCUUGGGACCCGACCGCACUUGCAUGCGGCCGGUGGUCCUGCGGGGGGUGACG	hsa-miR-520d-3p_MIMAT0002856_Homo_sapiens_miR-520d-3p	AAAGUGCUUCUCUUUGGUGGGU	GCCA&UGGU	((((&))))	5,8	16,19	-3.7	-4.4	0.41	0.28
		BFRF1_3'_UTR_	210	280	UGCGGACAGAGGCCAGAGCCGUUUGCUCCAUCUGUCAGCAACGCCAAGCUCCAGAGGACGCCCGCGACGA	hsa-miR-6719-3p_MIMAT0025850_Homo_sapiens_miR-6719-3p	UCUGACAUCAGUGAUUCUCCUG	CAGA&UCUG	((((&))))	14,17	2,5	-2.83	-4.3	1.04	0.43
		BFRF1_3'_UTR_	115	185	GGAUGCCAUCAUCCCCUGCUUGGGACCCGACCGCACUUGCAUGCGGCCGGUGGUCCUGCGGGGGGUGACG	hsa-miR-520c-3p_MIMAT0002846_Homo_sapiens_miR-520c-3p	AAAGUGCUUCCUUUUAGAGGGU	GCAU&GUGC	((((&))))	39,42	5,8	-2.9	-4	0.95	0.16
		BFRF1_3'_UTR_	489	559	GCUCAAAGAAGUUACCUGGUAUUUCUGACAUCCCAGUUCUGCUACGAAGAGUACGUGCAGAGGACUUUUG	hsa-miR-582-3p_MIMAT0004797_Homo_sapiens_miR-582-3p	UAACUGGUUGAACAACUGAACC	CAGU&ACUG	((((&))))	34,37	16,19	-1.64	-4	1.69	0.67
		BFRF1_3'_UTR_	115	185	GGAUGCCAUCAUCCCCUGCUUGGGACCCGACCGCACUUGCAUGCGGCCGGUGGUCCUGCGGGGGGUGACG	hsa-miR-372-3p_MIMAT0000724_Homo_sapiens_miR-372-3p	AAAGUGCUGCGACAUUUGAGCGU	UUGC&GCGA	((((&))))	37,40	10,13	-2.88	-3.7	0	0.82
		BFRF1_3'_UTR_	445	515	AAGAGCUGAACCAGAAUAAUCUCCCCAAUGAUGUUUUUCGGGAGGCUCAAAGAAGUUACCUGGUAUUUCU	hsa-miR-548h-3p_MIMAT0022723_Homo_sapiens_miR-548h-3p	CAAAAACCGCAAUUACUUUUGCA	GGU&ACC	(((&)))	62,64	7,9	-3.2	-3.4	0.2	0
		BFRF1_3'_UTR_	445	515	AAGAGCUGAACCAGAAUAAUCUCCCCAAUGAUGUUUUUCGGGAGGCUCAAAGAAGUUACCUGGUAUUUCU	hsa-miR-548z_MIMAT0018446_Homo_sapiens_miR-548z	CAAAAACCGCAAUUACUUUUGCA	GGU&ACC	(((&)))	62,64	7,9	-3.2	-3.4	0.2	0
		BFRF1_3'_UTR_	135	205	UGGGACCCGACCGCACUUGCAUGCGGCCGGUGGUCCUGCGGGGGGUGACGGUCAGGCAGCUCCUGUAUUU	hsa-miR-5000-3p_MIMAT0021020_Homo_sapiens_miR-5000-3p	UCAGGACACUUCUGAACUUGGA	GUC&GAC	(((&)))	51,53	6,8	-1.67	-3.3	0	1.63
		BFRF1_3'_UTR_	228	298	CCGUUUGCUCCAUCUGUCAGCAACGCCAAGCUCCAGAGGACGCCCGCGACGAGCCUCACCUGUUCUCCUC	hsa-miR-330-5p_MIMAT0004693_Homo_sapiens_miR-330-5p	UCUCUGGGCCUGUGUCUUAGGC	CCA&UGG	(((&)))	26,28	6,8	-3.14	-3.2	0	0.06
		BFRF1_3'_UTR_	116	186	GAUGCCAUCAUCCCCUGCUUGGGACCCGACCGCACUUGCAUGCGGCCGGUGGUCCUGCGGGGGGUGACGG	hsa-miR-6513-3p_MIMAT0025483_Homo_sapiens_miR-6513-3p	UCAAGUGUCAUCUGUCCCUAG	GAUG&CAUC	((((&))))	1,4	10,13	-3	-3.2	0	0.2
		BFRF1_3'_UTR_	435	505	CCUAAAUUUCAAGAGCUGAACCAGAAUAAUCUCCCCAAUGAUGUUUUUCGGGAGGCUCAAAGAAGUUACC	hsa-miR-4260_MIMAT0016881_Homo_sapiens_miR-4260	CUUGGGGCAUGGAGUCCCA	CCA&UGG	(((&)))	35,37	11,13	-3.1	-3.1	0	0
		BFRF1_3'_UTR_	227	297	GCCGUUUGCUCCAUCUGUCAGCAACGCCAAGCUCCAGAGGACGCCCGCGACGAGCCUCACCUGUUCUCCU	hsa-miR-4782-5p_MIMAT0019944_Homo_sapiens_miR-4782-5p	UUCUGGAUAUGAAGACAAUCAA	UCC&GGA	(((&)))	67,69	6,8	-2.91	-3.1	0.09	0.1
		BFRF1_3'_UTR_	204	274	UAACUUUGCGGACAGAGGCCAGAGCCGUUUGCUCCAUCUGUCAGCAACGCCAAGCUCCAGAGGACGCCCG	hsa-miR-3134_MIMAT0015000_Homo_sapiens_miR-3134	UGAUGGAUAAAAGACUACAUAUU	CCA&UGG	(((&)))	50,52	5,7	-2.29	-2.9	0.08	0.52
		BFRF1_3'_UTR_	269	339	GCCCGCGACGAGCCUCACCUGUUCUCCUCCUGUUUAGAGGUAGAAUUGCCACCUGGUGAGCGGUGUGCGG	hsa-miR-4799-5p_MIMAT0019976_Homo_sapiens_miR-4799-5p	AUCUAAAUGCAGCAUGCCAGUC	UGC&GCA	(((&)))	47,49	13,15	-2.63	-2.7	0.03	0.04
		BFRF1_3'_UTR_	495	565	AGAAGUUACCUGGUAUUUCUGACAUCCCAGUUCUGCUACGAAGAGUACGUGCAGAGGACUUUUGGGGUGC	hsa-miR-4524a-5p_MIMAT0019062_Homo_sapiens_miR-4524a-5p	AUAGCAGCAUGAACCUGUCUCA	GAG&CUC	(((&)))	43,45	20,22	-2.42	-2.6	0.04	0.14
		BFRF1_3'_UTR_	67	137	GCUGCCGCACAACGCGGCCUACGAGCUCGACCGUGGCUCCCGCCUCUUGGAUGCCAUCAUCCCCUGCUUG	hsa-miR-449b-3p_MIMAT0009203_Homo_sapiens_miR-449b-3p	CAGCCACAACUACCCUGCCACU	GCU&AGC	(((&)))	1,3	3,5	-2.31	-2.5	0.03	0.16
		BFRF1_3'_UTR_	173	243	CGGGGGGUGACGGUCAGGCAGCUCCUGUAUUUAACUUUGCGGACAGAGGCCAGAGCCGUUUGCUCCAUCU	hsa-miR-561-3p_MIMAT0003225_Homo_sapiens_miR-561-3p	CAAAGUUUAAGAUCCUUGAAGU	AACUU&AAGUU	(((((&)))))	33,37	4,8	-0.56	-2.2	0	1.64
		BFRF1_3'_UTR_	495	565	AGAAGUUACCUGGUAUUUCUGACAUCCCAGUUCUGCUACGAAGAGUACGUGCAGAGGACUUUUGGGGUGC	hsa-miR-4524b-5p_MIMAT0022255_Homo_sapiens_miR-4524b-5p	AUAGCAGCAUAAGCCUGUCUC	GAG&CUC	(((&)))	43,45	20,22	-1.15	-1.3	0.04	0.11
		BFRF1_3'_UTR_	445	515	AAGAGCUGAACCAGAAUAAUCUCCCCAAUGAUGUUUUUCGGGAGGCUCAAAGAAGUUACCUGGUAUUUCU	hsa-miR-548x-3p_MIMAT0015081_Homo_sapiens_miR-548x-3p	UAAAAACUGCAAUUACUUUC	GGU&ACU	(((&)))	62,64	7,9	-0.79	-1	0.2	0.01
		BFRF1_3'_UTR_	445	515	AAGAGCUGAACCAGAAUAAUCUCCCCAAUGAUGUUUUUCGGGAGGCUCAAAGAAGUUACCUGGUAUUUCU	hsa-miR-548aq-3p_MIMAT0022264_Homo_sapiens_miR-548aq-3p	CAAAAACUGCAAUUACUUUUGC	GGU&ACU	(((&)))	62,64	7,9	-0.79	-1	0.2	0
		BFRF1_3'_UTR_	445	515	AAGAGCUGAACCAGAAUAAUCUCCCCAAUGAUGUUUUUCGGGAGGCUCAAAGAAGUUACCUGGUAUUUCU	hsa-miR-548ae-3p_MIMAT0018954_Homo_sapiens_miR-548ae-3p	CAAAAACUGCAAUUACUUUCA	GAA&UUC	((.&.))	8,10	19,21	-0.88	-0.9	0	0.02
